# Supplementary material for: Fauna Europaea – Orthopteroid orders
Source: Biodivers Data J. 2016 Jun 29;(4):e8905. doi: 10.3897/BDJ.4.e8905 (PMC5018117; doi:10.3897/BDJ.4.e8905)
Supplement: Supplementary material 3 — Orthopteroids — Fauna Europaea mapping [file biodiversity_data_journal-4-e8905-s003.xlsx]

## Sheet: Orthoptera Species File
Scientificname OrthoFile	Status in OrthoFile	TaxonNameID OrthoFile	Valid Name Fauna Europaea	Authority in Fauna Europaea	Status in Fauna Europaea	GUID Fauna Europaea	GUID Fauna Europaea valid name	Match Type	Validation comment		Global Names Index ID	Global Names Index (GNI) LSID
Acanthacris ruficornis ruficornis (Fabricius, 1787)	subspecies	1112599	Acanthacris ruficornis	(Fabricius, 1787)	accepted	urn:lsid:faunaeur.org:taxname:402656		unbiased infra rank	As nominal subspecies in OSF		11639721	urn:lsid:globalnames.org:index:93084db9-63a8-5b1a-afac-29aeef541d4f
Acanthogryllus acus Gorochov, 1988	species	1122567	Acanthogryllus acus	Gorochov, 1988	accepted	urn:lsid:faunaeur.org:taxname:403025		exact			817302	urn:lsid:globalnames.org:index:fe833b31-2ed1-5e91-af58-3937b981967e
Acheta domesticus (Linnaeus, 1758)	species	1122540	Acheta domesticus	(Linnaeus, 1758)	accepted	urn:lsid:faunaeur.org:taxname:403019		exact
Acheta gossypii (Costa, 1855)	species	1122555	Acheta gossypii	(Costa, 1855)	accepted	urn:lsid:faunaeur.org:taxname:403020		exact
Acheta hispanicus Rambur, 1838	species	1122552	Acheta hispanicus	Rambur, 1839	accepted	urn:lsid:faunaeur.org:taxname:403021		exact			817299	urn:lsid:globalnames.org:index:95d4a4c0-7f60-5e59-b448-a6210464e1c3
Acheta meridionalis (Uvarov, 1921)	species	1122545	Acheta meridionalis	(Uvarov, 1921)	accepted	urn:lsid:faunaeur.org:taxname:403022		exact
Gryllulus canariensis Chopard, 1938	synonym species	1122546	Acheta meridionalis	Chopard, 1938	is subjective synonym of	urn:lsid:faunaeur.org:taxname:403023	urn:lsid:faunaeur.org:taxname:403022	exact
Acinipe calabra (Costa, 1836)	species	1116767	Acinipe calabra	(Costa, 1828)	accepted	urn:lsid:faunaeur.org:taxname:402811		exact
Acinipe comptei Llorente del Moral, 1980	species	1116769	Acinipe comptei	Llorente, 1978	accepted	urn:lsid:faunaeur.org:taxname:402812		near	As nominal subspecies in OSF. Authorship correction.
Acinipe deceptoria (Bolívar, 1878)	species	1116785	Acinipe deceptoria	(Bolivar, 1878)	accepted	urn:lsid:faunaeur.org:taxname:402813		exact
Acinipe eulaliae Olmo-Vidal, 2009	species	1116801	Acinipe eulaliae	Olmo-Vidal, 2009	accepted	urn:lsid:faunaeur.org:taxname:402814		exact
Acinipe galvagnii Cusimano & Massa, 1977	species	1116772	Acinipe galvagnii	Cusimano & Massa, 1977	accepted	urn:lsid:faunaeur.org:taxname:402815		exact
Acinipe hesperica hesperica Rambur, 1838	subspecies	1116789	Acinipe hesperica	Rambur, 1838	accepted	urn:lsid:faunaeur.org:taxname:402816		unbiased infra rank	As nominal subspecies in OSF		666406	urn:lsid:globalnames.org:index:f936892e-fc5c-56b9-9cf3-7b5ef235e476
Acinipe ignatii Llorente del Moral & Presa, 1983	species	1116773	Acinipe ignatii	Presa, 1983	accepted	urn:lsid:faunaeur.org:taxname:402817		near	Authorship correction.
Acinipe mabillei (Bolívar, 1878)	species	1116774	Acinipe mabillei	(Bolivar, 1878)	accepted	urn:lsid:faunaeur.org:taxname:402818		exact
Acinipe paulinoi (Bolívar, 1887)	species	1116778	Acinipe paulinoi	(Saussure, 1887)	accepted	urn:lsid:faunaeur.org:taxname:402819		exact
Acinipe perisi Llorente del Moral & Presa, 1983	species		Acinipe perisi	Presa, 1883	accepted	urn:lsid:faunaeur.org:taxname:402820		near	Authorship correction.
Acinipe segurensis (Bolívar, 1908)	species	1116787	Acinipe segurensis	(Bolivar, 1908)	accepted	urn:lsid:faunaeur.org:taxname:402821		exact
Acinipe tibialis (Fieber, 1853)	species	1116783	Acinipe tibialis	(Fieber, 1853)	accepted	urn:lsid:faunaeur.org:taxname:402822		exact
Acrida bicolor (Thunberg, 1815)	species	1111348	Acrida bicolor	(Thunberg, 1815)	accepted	urn:lsid:faunaeur.org:taxname:402763		exact
Acrida oxycephala (Pallas, 1771)	species		Acrida oxycephala	(Pallas, 1771)	accepted	urn:lsid:faunaeur.org:taxname:402764		exact
Acrida turrita (Linnaeus, 1758)	species	1111405	Acrida turrita	(Linnaeus, 1758)	accepted	urn:lsid:faunaeur.org:taxname:402765		exact			11639835	urn:lsid:globalnames.org:index:6b6452cf-532c-5679-aba4-88b9f0a4268b
Acrida ungarica ungarica (Herbst, 1786)	subspecies	1111415	Acrida ungarica	(Herbst, 1786)	accepted	urn:lsid:faunaeur.org:taxname:402766		unbiased infra rank	As nominal subspecies in OSF
Acrometopa cretensis cretensis Ramme, 1927	subspecies	1137186	Acrometopa cretensis	Ramme, 1927	accepted	urn:lsid:faunaeur.org:taxname:403203		unbiased infra rank	As nominal subspecies in OSF		618392	urn:lsid:globalnames.org:index:940b501e-76b6-57c1-a406-867d4cb41a03
Acrometopa servillea (Brullé, 1832)	species	1137178	Acrometopa servillea	(Brullé, 1832)	accepted	urn:lsid:faunaeur.org:taxname:403205		exact
Acrometopa italica Ramme, 1927	species	1137180	Acrometopa servillea italica	Ramme, 1927	accepted	urn:lsid:faunaeur.org:taxname:403206		unbiased infra rank	As species in OSF		16961391	urn:lsid:globalnames.org:index:c3c8a77a-36cf-5ae9-8f09-ab3f4b5150fd
Acrometopa macropoda (Burmeister, 1838)	species	1137181	Acrometopa servillea macropoda	(Burmeister, 1838)	accepted	urn:lsid:faunaeur.org:taxname:403207		unbiased infra rank	As species in OSF
Acrometopa servillea (Brullé, 1832)	species	1137178	Acrometopa servillea servillea	(Brullé, 1832)	accepted	urn:lsid:faunaeur.org:taxname:403208		unbiased infra rank	As species in OSF
Acrometopa syriaca Brunner von Wattenwyl, 1878	species	1137187	Acrometopa syriaca	Brunner von Wattenwyl, 1878	accepted	urn:lsid:faunaeur.org:taxname:403209		exact			812250	urn:lsid:globalnames.org:index:24edeed8-07a9-5ebb-aff2-807ed3120e05
Acroneuroptila puddui Cadeddu, 1970	species	1124000	Acroneuroptila puddui	Cadeddu, 1970	accepted	urn:lsid:faunaeur.org:taxname:402977		exact			818395	urn:lsid:globalnames.org:index:32ce5a3a-52c2-5cb6-83cd-3c5f1652741c
Acroneuroptila sardoa Baccetti, 1959	species	1124001	Acroneuroptila sardoa	Baccetti, 1959	accepted	urn:lsid:faunaeur.org:taxname:402978		exact			818396	urn:lsid:globalnames.org:index:b9869578-bfbb-5278-ad65-7c6d665c1e54
Acrostira bellamyi (Uvarov, 1922)	species	1116904	Acrostira bellamyi	(Uvarov, 1922)	accepted	urn:lsid:faunaeur.org:taxname:402807		exact
Acrostira euphorbiae Garcia-Becerra & Oromí, 1992	species	1116906	Acrostira euphorbiae	Garcia-Becerra & Oromi, 1992	accepted	urn:lsid:faunaeur.org:taxname:402808		exact
Acrostira tamarani Baez, 1984	species	1116907	Acrostira tamarani	Baez, 1984	accepted	urn:lsid:faunaeur.org:taxname:402809		exact			807715	urn:lsid:globalnames.org:index:8f87afbb-ba0f-5758-90e5-1995fb3c242a
Acrostira tenerifae Perez & López, 2005	species	1116908	Acrostira tenerifae	Pérez & López, 2005	accepted	urn:lsid:faunaeur.org:taxname:402810		exact
Acrotylus insubricus braudi Defaut, 2005	subspecies	1104101	Acrotylus braudi	Defaut, 2005	accepted	urn:lsid:faunaeur.org:taxname:402415		unbiased infra rank	As subspecies in OSF		808241	urn:lsid:globalnames.org:index:dac8a72a-a6cf-53f6-83b6-450bcd25d526
Acrotylus fischeri Azam, 1901	species	1104059	Acrotylus fischeri	Azam, 1901	accepted	urn:lsid:faunaeur.org:taxname:402416		exact			808259	urn:lsid:globalnames.org:index:83610f8f-6a81-59c2-8a6c-3fc33224ffcb
Acrotylus insubricus insubricus (Scopoli, 1786)	subspecies	1104103	Acrotylus insubricus	(Scopoli, 1786)	accepted	urn:lsid:faunaeur.org:taxname:402417		unbiased infra rank	As nominal subspecies in OSF
Acrotylus longipes longipes (Charpentier, 1845)	subspecies	1104091	Acrotylus longipes	(Charpentier, 1845)	accepted	urn:lsid:faunaeur.org:taxname:402418		unbiased infra rank	As nominal subspecies in OSF
Acrotylus patruelis (Herrich-Schäffer, 1838)	species	1104080	Acrotylus patruelis	(Herrich-Schäffer, 1838)	accepted	urn:lsid:faunaeur.org:taxname:402419		exact
Aeropedellus variegatus variegatus (Fischer von Waldheim, 1846)	subspecies	1106239	Aeropedellus variegatus	(Fischer de Waldheim, 1846)	accepted	urn:lsid:faunaeur.org:taxname:402629		unbiased infra rank	As nominal subspecies in OSF
Aeropedellus volgensis (Predtechenskii, 1928)	species	1106236	Aeropedellus volgensis	(Predtetshenskii, 1928)	accepted	urn:lsid:faunaeur.org:taxname:402630		exact
Aiolopus puissanti Defaut, 2005	species	1103337	Aiolopus puissanti	Defaut, 2005	accepted	urn:lsid:faunaeur.org:taxname:402410		exact			808745	urn:lsid:globalnames.org:index:fcbbc50d-3f59-5509-a795-27ce25254416
Aiolopus simulatrix simulatrix (Walker, 1870)	subspecies	1103303	Aiolopus simulatrix	(Walker, 1870)	accepted	urn:lsid:faunaeur.org:taxname:402411		unbiased infra rank	As nominal subspecies in OSF
Aiolopus strepens strepens (Latreille, 1804)	subspecies	1103310	Aiolopus strepens	(Latreille, 1804)	accepted	urn:lsid:faunaeur.org:taxname:402412		unbiased infra rank	As nominal subspecies in OSF
Aiolopus thalassinus thalassinus (Fabricius, 1781)	subspecies	1103316	Aiolopus thalassinus	(Fabricius, 1781)	accepted	urn:lsid:faunaeur.org:taxname:402413		unbiased infra rank	As nominal subspecies in OSF
Albarracinia zapaterii (Bolívar, 1877)	species	1132537	Albarracinia zapaterii	(Bolivar, 1877)	accepted	urn:lsid:faunaeur.org:taxname:403111		exact
Amedegnatiana vicheti (Delmas & Rambier, 1950)	species	1142449	Amedegnatiana vicheti	(Delmas & Rambur, 1950)	accepted	urn:lsid:faunaeur.org:taxname:403575		exact
Amphiestris baetica (Rambur, 1838)	species	1142718	Amphiestris baetica	(Rambur, 1839)	accepted	urn:lsid:faunaeur.org:taxname:403390		exact
Anacridium aegyptium (Linnaeus, 1764)	species	1112463	Anacridium aegyptium	(Linnaeus, 1764)	accepted	urn:lsid:faunaeur.org:taxname:402654		exact
Anadrymadusa (Anadrymadusa) brevipennis (Brunner von Wattenwyl, 1882)	species	1141887	Anadrymadusa brevipennis	(Brunner von Wattenwyl, 1882)	accepted	urn:lsid:faunaeur.org:taxname:403393		exact
Anadrymadusa (Anadrymadusa) ornatipennis (Ramme, 1926)	species	1141894	Anadrymadusa ornatipennis	(Ramme, 1926)	accepted	urn:lsid:faunaeur.org:taxname:403395		exact
Anadrymadusa (Anadrymadusa) retowskii (Adelung, 1907)	species	1141888	Anadrymadusa retowskii	(Adelung, 1907)	accepted	urn:lsid:faunaeur.org:taxname:403396		exact
Ancistrura nigrovittata (Brunner von Wattenwyl, 1878)	species	1137713	Ancistrura nigrovittata	(Brunner von Wattenwyl, 1878)	accepted	urn:lsid:faunaeur.org:taxname:403211		exact
Andreiniimon nuptialis (Karny, 1918)	species	1137710	Andreiniimon nuptialis	(Karny, 1918)	accepted	urn:lsid:faunaeur.org:taxname:403214		exact
Angaracris barabensis (Pallas, 1773)	species	1104200	Angaracris barabensis	(Pallas, 1773)	accepted	urn:lsid:faunaeur.org:taxname:402408		exact
Oedipoda rhodopa Fischer von Waldheim, 1836	synonym species	1104201	Angaracris barabensis	Fischer de Waldheim, 1836	is subjective synonym of	urn:lsid:faunaeur.org:taxname:402409	urn:lsid:faunaeur.org:taxname:402408	exact
Anonconotus alpinus (Yersin, 1858)	species	1142114	Anonconotus alpinus	(Yersin, 1858)	accepted	urn:lsid:faunaeur.org:taxname:403399		exact
Anonconotus apenninigenus (Targioni-Tozzetti, 1881)	species	1142116	Anonconotus apenninigenus	(Targioni-Tozzetti, 1881)	accepted	urn:lsid:faunaeur.org:taxname:403400		exact			1264166	urn:lsid:globalnames.org:index:3e9f3106-e32d-5dff-baf4-cd632ee01fa5
Anonconotus baracunensis Nadig, 1987	species	1142107	Anonconotus baracunensis	Nadig, 1987	accepted	urn:lsid:faunaeur.org:taxname:403401		exact			622547	urn:lsid:globalnames.org:index:95f476d8-39d6-582f-ab9a-43ee0e27c58d
Anonconotus ghilianii Camerano, 1878	species	1142117	Anonconotus ghilianii	Camerano, 1878	accepted	urn:lsid:faunaeur.org:taxname:403403		exact			17254605	urn:lsid:globalnames.org:index:36cd9739-49a3-52c3-97b3-89f2dff81234
Anonconotus italoaustriacus Nadig, 1987	species	1142115	Anonconotus italoaustriacus	Nadig, 1987	accepted	urn:lsid:faunaeur.org:taxname:403404		exact			1264167	urn:lsid:globalnames.org:index:0352f129-d200-577d-a266-369063ecc37c
Anonconotus ligustinus Galvagni, 2002	species	1142105	Anonconotus ligustinus	Galvagni, 2002	accepted	urn:lsid:faunaeur.org:taxname:403405		exact			1264169	urn:lsid:globalnames.org:index:5166eb9e-cee3-5afd-9556-3efb39b8bd4f
Anonconotus mercantouri Galvagni & Fontana, 2003	species	1142111	Anonconotus mercantouri	Galvagni & Fontana, 2003	accepted	urn:lsid:faunaeur.org:taxname:403406		exact
Anonconotus occidentalis Carron & Wermeille, 2002	species	1142108	Anonconotus occidentalis	Carron & Wermeille, 2002	accepted	urn:lsid:faunaeur.org:taxname:403402		exact
Anonconotus pusillus Carron & Sardet, 2002	species	1142110	Anonconotus pusillus	Carron & Sardet, 2002	accepted	urn:lsid:faunaeur.org:taxname:403407		exact
Anonconotus sibyllinus Galvagni, 2002	species	1142106	Anonconotus sibyllinus	Galvagni, 2002	accepted	urn:lsid:faunaeur.org:taxname:403408		exact			1264170	urn:lsid:globalnames.org:index:77dc33e3-c792-5b3e-bbda-f34cb8ba6fc1
Antaxius (Chopardius) beieri Harz, 1966	species	1142132	Antaxius beieri	Harz, 1966	accepted	urn:lsid:faunaeur.org:taxname:403410		exact			1264190	urn:lsid:globalnames.org:index:b53e2798-a1cb-55bd-a67e-80c187ac5fb9
Antaxius (Cyrnantaxius) bouvieri Chopard, 1924	species	1142139	Antaxius bouveri	Chopard, 1923	accepted	urn:lsid:faunaeur.org:taxname:403411		phonetic	Authorship correction
Antaxius capellei Cazurro y Ruiz, 1888	synonym species	1142131	Antaxius capellei	Cazurro, 1888	accepted	urn:lsid:faunaeur.org:taxname:403412		exact			13077513	urn:lsid:globalnames.org:index:5987a6cd-0f8d-5ddd-b48f-e660c1522295
Antaxius (Chopardius) chopardi Morales-Agacino, 1936	species	1142133	Antaxius chopardi	Morales Agacino, 1936	accepted	urn:lsid:faunaeur.org:taxname:403413		exact			1264188	urn:lsid:globalnames.org:index:3bb2e1be-5a77-56ef-ae9e-010639939ef4
Antaxius (Hoelzeliana) difformis (Brunner von Wattenwyl, 1861)	species	1142120	Antaxius difformis	(Brunner von Wattenwyl, 1861)	accepted	urn:lsid:faunaeur.org:taxname:403414		exact
Antaxius (Chopardius) florezi Bolívar, 1900	species	1142122	Antaxius florezi	Bolivar, 1900	accepted	urn:lsid:faunaeur.org:taxname:403415		exact
Antaxius (Chopardius) hispanicus Bolívar, 1884	species	1142129	Antaxius hispanicus	Bolivar, 1887	accepted	urn:lsid:faunaeur.org:taxname:403416		exact
Antaxius (Antaxius) kraussii (Bolívar, 1878)	species	1142124	Antaxius kraussii	(Bolivar, 1878)	accepted	urn:lsid:faunaeur.org:taxname:403417		exact
Antaxius kraussi Brunner von Wattenwyl, 1882	synonym species	1142130	Antaxius kraussii	(Bolivar, 1878)	accepted	urn:lsid:faunaeur.org:taxname:403417	urn:lsid:faunaeur.org:taxname:403417	phonetic	Authorship correction?
Antaxius (Chopardius) pedestris pedestris (Fabricius, 1787)	subspecies	1142136	Antaxius pedestris	(Fabricius, 1787)	accepted	urn:lsid:faunaeur.org:taxname:403418		unbiased infra rank	As nominal subspecies in OSF. Subgenus name correction
Antaxius (Chopardius) sorrezensis (Marquet, 1877)	species	1142137	Antaxius sorrezensis	(Marquet, 1877)	accepted	urn:lsid:faunaeur.org:taxname:403419		exact
Antaxius (Chopardius) spinibrachius (Fischer, 1853)	species	1142126	Antaxius spinibrachius	(Fischer, 1853)	accepted	urn:lsid:faunaeur.org:taxname:403420		exact
Anterastes serbicus Brunner von Wattenwyl, 1882	species	1142147	Anterastes serbicus	Brunner von Wattenwyl, 1882	accepted	urn:lsid:faunaeur.org:taxname:403422		exact			1264183	urn:lsid:globalnames.org:index:eef07506-cd23-50c2-84ef-47737da98e9f
Arachnocephalus vestitus Costa, 1855	species	1128701	Arachnocephalus vestitus	Costa, 1855	accepted	urn:lsid:faunaeur.org:taxname:403042		exact
Arcyptera (Arcyptera) fusca (Pallas, 1773)	species	1105389	Arcyptera (Arcyptera) fusca	(Pallas, 1773)	accepted	urn:lsid:faunaeur.org:taxname:402618		exact
Arcyptera (Arcyptera) tornosi Bolívar, 1884	species	1105384	Arcyptera (Arcyptera) tornosi	Bolivar, 1884	accepted	urn:lsid:faunaeur.org:taxname:402619		exact
Arcyptera (Pararcyptera) alzonai Capra, 1938	species	1105404	Arcyptera (Pararcyptera) brevipennis	Capra, 1938	is subjective synonym of	urn:lsid:faunaeur.org:taxname:402623	urn:lsid:faunaeur.org:taxname:402621	exact
Arcyptera (Pararcyptera) mariae Navás, 1908	species	1105405	Arcyptera (Pararcyptera) brevipennis	Navàs, 1908	is subjective synonym of	urn:lsid:faunaeur.org:taxname:402622	urn:lsid:faunaeur.org:taxname:402621	exact
Arcyptera (Pararcyptera) kheili Azam, 1900	species	1105400	Arcyptera (Pararcyptera) kheili	Azam, 1900	accepted	urn:lsid:faunaeur.org:taxname:402624		exact
Arcyptera (Pararcyptera) labiata (Brullé, 1832)	species	1105401	Arcyptera (Pararcyptera) labiata	(Brullé, 1832)	accepted	urn:lsid:faunaeur.org:taxname:402625		exact
Arcyptera (Pararcyptera) microptera microptera (Fischer von Waldheim, 1833)	subspecies	1105409	Arcyptera (Pararcyptera) microptera	(Fischer de Waldheim, 1833)	accepted	urn:lsid:faunaeur.org:taxname:402626		unbiased infra rank	As nominal subspecies in OSF
Ariagona margaritae Krauss, 1892	species	1142163	Ariagona margaritae	Krauss, 1892	accepted	urn:lsid:faunaeur.org:taxname:403424		exact			1264200	urn:lsid:globalnames.org:index:41e522eb-b57a-5d95-8a71-da2d805be66a
Arminda brunneri Krauss, 1892	species	1108737	Arminda (Arminda) brunneri	Krauss, 1892	accepted	urn:lsid:faunaeur.org:taxname:402735		exact
Arminda burri Uvarov, 1935	species	1108740	Arminda (Arminda) burri	Uvarov, 1935	accepted	urn:lsid:faunaeur.org:taxname:402736		exact
Arminda fuerteventurae Holzapfel, 1972	species	1108744	Arminda (Arminda) fuerteventurae	Holzapfel, 1972	accepted	urn:lsid:faunaeur.org:taxname:402737		exact
Arminda hierroensis Enderlein, 1930	species	1108741	Arminda (Arminda) hierroensis	Enderlein, 1930	accepted	urn:lsid:faunaeur.org:taxname:402738		exact
Arminda lancerottensis Holzapfel, 1972	species	1108743	Arminda (Arminda) lancerottensis	Holzapfel, 1972	accepted	urn:lsid:faunaeur.org:taxname:402739		exact
Arminda latifrons Enderlein, 1930	species	1108742	Arminda (Arminda) latifrons	Enderlein, 1930	accepted	urn:lsid:faunaeur.org:taxname:402740		exact
Chopardminda canariensis Morales-Agacino, 1941	species	1108941	Arminda (Chopardminda) canariensis	Morales Agacino, 1941	accepted	urn:lsid:faunaeur.org:taxname:402742		near	Subgenus name correction
Asiotmethis limbatus limbatus (Charpentier, 1845)	subspecies	1117418	Asiotmethis limbatus	(Charpentier, 1845)	accepted	urn:lsid:faunaeur.org:taxname:402837		unbiased infra rank	As nominal subspecies in OSF
Asiotmethis muricatus muricatus (Pallas, 1771)	subspecies	1117421	Asiotmethis muricatus	(Pallas, 1771)	accepted	urn:lsid:faunaeur.org:taxname:402838		unbiased infra rank	As nominal subspecies in OSF
Asiotmethis nigripedis Steinmann, 1966	species	1117406	Asiotmethis muricatus	Steinmann, 1966	is subjective synonym of	urn:lsid:faunaeur.org:taxname:402839	urn:lsid:faunaeur.org:taxname:402838	exact
Asiotmethis tauricus tauricus (Tarbinsky, 1930)	subspecies	1117431	Asiotmethis tauricus	(Tarbinsky, 1930)	accepted	urn:lsid:faunaeur.org:taxname:402840		unbiased infra rank	As nominal subspecies in OSF
Asiotridactylus fasciatus (Guérin-Méneville, 1844)	species	1100242	Asiotridactylus fasciatus	(Guérin-Méneville, 1844)	accepted	urn:lsid:faunaeur.org:taxname:402299		exact
Baetica ustulata (Rambur, 1838)	species	1132332	Baetica ustulata	(Rambur, 1838)	accepted	urn:lsid:faunaeur.org:taxname:403074		exact
Barbitistes constrictus Brunner von Wattenwyl, 1878	species	1137718	Barbitistes constrictus	Brunner von Wattenwyl, 1878	accepted	urn:lsid:faunaeur.org:taxname:403215		exact			618453	urn:lsid:globalnames.org:index:bd715e39-9336-591a-b2fd-136b789f7298
Barbitistes fischeri (Yersin, 1854)	species	1137720	Barbitistes fischeri	(Yersin, 1854)	accepted	urn:lsid:faunaeur.org:taxname:403217		exact
Barbitistes kaltenbachi Harz, 1965	species	1137723	Barbitistes kaltenbachi	Harz, 1965	accepted	urn:lsid:faunaeur.org:taxname:403218		exact			812188	urn:lsid:globalnames.org:index:daafc713-967d-5181-b5e2-6ab42d1edf49
Barbitistes obtusus Targioni-Tozzetti, 1881	species	1137724	Barbitistes obtusus	Targioni-Tozzetti, 1881	accepted	urn:lsid:faunaeur.org:taxname:403219		exact			812187	urn:lsid:globalnames.org:index:d2a456b1-e837-5fc5-9aa7-9fb33158942a
Barbitistes ocskayi Charpentier, 1850	species	1137726	Barbitistes ocskayi	Charpentier, 1850	accepted	urn:lsid:faunaeur.org:taxname:403220		exact			812186	urn:lsid:globalnames.org:index:b130bb80-e056-595a-acba-6fbee894ab94
Barbitistes serricauda (Fabricius, 1794)	species	1137729	Barbitistes serricauda	(Fabricius, 1798)	accepted	urn:lsid:faunaeur.org:taxname:403221		exact
Barbitistes vicetinus Galvagni & Fontana, 1993	species	1137733	Barbitistes vicetinus	Galvagni & Fontana, 1993	accepted	urn:lsid:faunaeur.org:taxname:403222		exact
Barbitistes yersini Brunner von Wattenwyl, 1878	species	1137734	Barbitistes yersini	Brunner von Wattenwyl, 1878	accepted	urn:lsid:faunaeur.org:taxname:403223		exact			16849441	urn:lsid:globalnames.org:index:bbe6984d-f99e-50f1-b910-591b42e7188e
Bicolorana bicolor (Philippi, 1830)	species	1142483	Bicoloriana bicolor	(Philippi, 1830)	accepted	urn:lsid:faunaeur.org:taxname:403499		near	Species name correction
Metrioptera kuntzeni Ramme, 1931	synonym species	1142490	Bicoloriana kuntzeni	(Ramme, 1931)	accepted	urn:lsid:faunaeur.org:taxname:403508		near	Genus & status correction
Brachycrotaphus tryxalicerus (Fischer, 1853)	species	1106955	Brachycrotaphus tryxalicerus	(Fischer, 1853)	accepted	urn:lsid:faunaeur.org:taxname:402615		exact
Brachytrupes megacephalus (Lefebvre, 1827)	species	1123814	Brachytrupes megacephalus	(Lefebvre, 1827)	accepted	urn:lsid:faunaeur.org:taxname:403018		exact
Bradyporus (Bradyporus) dasypus (Illiger, 1800)	species	1132301	Bradyporus (Bradyporus) dasypus	(Illiger, 1800)	accepted	urn:lsid:faunaeur.org:taxname:403067		exact
Bradyporus (Callimenus) macrogaster macrogaster (Lefebvre, 1831)	subspecies	1132277	Bradyporus (Callimenus) macrogaster	(Lefebvre, 1831)	accepted	urn:lsid:faunaeur.org:taxname:403069		unbiased infra rank	As nominal subspecies in OSF
Bradyporus (Callimenus) montandoni (Burr, 1898)	species	1132296	Bradyporus (Callimenus) montandoni	Burr, 1898	accepted	urn:lsid:faunaeur.org:taxname:403070		exact
Bradyporus (Callimenus) multituberculatus (Fischer von Waldheim, 1833)	species	1132272	Bradyporus (Callimenus) multituberculatus	(Fischer de Waldheim, 1833)	accepted	urn:lsid:faunaeur.org:taxname:403071		exact
Bradyporus (Callimenus) oniscus (Burmeister, 1838)	species	1132297	Bradyporus (Callimenus) oniscus	Burmeister, 1838	accepted	urn:lsid:faunaeur.org:taxname:403072		exact
Broughtonia arnoldi (Ramme, 1933)	species	1142266	Broughtonia arnoldi	(Ramme, 1933)	accepted	urn:lsid:faunaeur.org:taxname:403504		exact
Broughtonia domogledi (Brunner von Wattenwyl, 1882)	species	1142267	Broughtonia domogledi	(Brunner von Wattenwyl, 1882)	accepted	urn:lsid:faunaeur.org:taxname:403503		exact
Bruntridactylus irremipes (Uvarov, 1934)	species	1100199	Bruntridactylus irremipes	(Uvarov, 1934)	accepted	urn:lsid:faunaeur.org:taxname:402296		exact
Bruntridactylus tartarus (Saussure, 1874)	species	1100204	Bruntridactylus tartarus	(Saussure, 1874)	accepted	urn:lsid:faunaeur.org:taxname:402297		exact
Bryodemella (Bryodemella) tuberculata tuberculata (Fabricius, 1775)	subspecies	1104271	Bryodemella tuberculata	(Fabricius, 1775)	accepted	urn:lsid:faunaeur.org:taxname:402406		unbiased infra rank	As nominal subspecies in OSF
Bucephaloptera bucephala (Brunner von Wattenwyl, 1882)	species	1142168	Bucephaloptera bucephala	(Brunner von Wattenwyl, 1882)	accepted	urn:lsid:faunaeur.org:taxname:403426		exact
Bucephaloptera cypria Ramme, 1933	species	1142172	Bucephaloptera cypria	Ramme, 1933	accepted	urn:lsid:faunaeur.org:taxname:403427		exact			1264205	urn:lsid:globalnames.org:index:4e228b09-854f-5848-a523-c08de61f4736
Calephorus compressicornis (Latreille, 1804)	species	1111450	Calephorus compressicornis	(Latreille, 1804)	accepted	urn:lsid:faunaeur.org:taxname:402404		exact
Callicrania (Callicrania) belarrensis Barat, 2007	species	1132526	Callicrania (Callicrania) belarrensis	Barat, 2007	accepted	urn:lsid:faunaeur.org:taxname:403077		exact
Callicrania (Callicrania) denticulata Barat, 2007	species	1132527	Callicrania (Callicrania) denticulata	Barat, 2007	accepted	urn:lsid:faunaeur.org:taxname:403078		exact
Callicrania (Callicrania) plaxicauda Barat, 2007	species	1132528	Callicrania (Callicrania) plaxicauda	Barat, 2007	accepted	urn:lsid:faunaeur.org:taxname:403079		exact
Callicrania (Callicrania) ramburii (Bolívar, 1878)	species	1132524	Callicrania (Callicrania) ramburii	(Bolivar, 1878)	accepted	urn:lsid:faunaeur.org:taxname:403080		exact
Callicrania (Mucrocallicrania) demandae (Schroeter & Pfau, 1987)	species	1132530	Callicrania (Mucrocallicania) demandae	(Schroeter & Pfau, 1987)	accepted	urn:lsid:faunaeur.org:taxname:403083		exact
Callicrania (Mucrocallicrania) faberi (Harz, 1975)	species	1132531	Callicrania (Mucrocallicania) faberi	(Harz, 1975)	accepted	urn:lsid:faunaeur.org:taxname:403084		exact
Callicrania (Mucrocallicrania) vicentae Barat, 2007	species	1132532	Callicrania (Mucrocallicania) vicentae	Barat, 2007	accepted	urn:lsid:faunaeur.org:taxname:403085		exact
Calliphona (Calliphonides) alluaudi Bolívar, 1893	species	1142043	Calliphona alluaudi	Bolivar, 1893	accepted	urn:lsid:faunaeur.org:taxname:403429		exact
Calliphona (Calliphona) koenigi Krauss, 1892	species	1142040	Calliphona koenigi	Krauss, 1892	accepted	urn:lsid:faunaeur.org:taxname:403430		exact			1264126	urn:lsid:globalnames.org:index:2c018b49-2d8d-51bf-8128-8415a7dee788
Calliphona (Calliphonides) palmensis Bolívar, 1940	species	1142044	Calliphona palmensis	Bolivar, 1940	accepted	urn:lsid:faunaeur.org:taxname:403431		exact			18230816	urn:lsid:globalnames.org:index:b8659f53-271b-5f46-8bcf-dccfc94c72fd
Calliptamus barbarus barbarus (Costa, 1836)	subspecies	1112916	Calliptamus barbarus	(Costa, 1836)	accepted	urn:lsid:faunaeur.org:taxname:402749		unbiased infra rank	As nominal subspecies in OSF
Calliptamus coelesyriensis Giglio-Tos, 1893	species	1112932	Calliptamus coelesyriensis	(Giglio-Tos, 1893)	accepted	urn:lsid:faunaeur.org:taxname:402750		exact			1264435	urn:lsid:globalnames.org:index:5d0554fa-7f02-5d3b-8eea-a91e90fe5272
Calliptamus italicus italicus (Linnaeus, 1758)	subspecies	1112939	Calliptamus italicus	(Linnaeus, 1758)	accepted	urn:lsid:faunaeur.org:taxname:402751		unbiased infra rank	As nominal subspecies in OSF
Calliptamus madeirae Uvarov, 1937	species	1112897	Calliptamus madeirae	Uvarov, 1937	accepted	urn:lsid:faunaeur.org:taxname:402752		exact			1264351	urn:lsid:globalnames.org:index:57bf64f3-1ca3-5962-a1a4-6e9d0fd4b7fd
Calliptamus plebeius plebeius (Walker, 1870)	subspecies	1112959	Calliptamus plebeius	(Walker, 1870)	accepted	urn:lsid:faunaeur.org:taxname:402753		unbiased infra rank	As nominal subspecies in OSF
Calliptamus siciliae Ramme, 1927	species	1112898	Calliptamus siciliae	Ramme, 1927	accepted	urn:lsid:faunaeur.org:taxname:402754		exact			1264355	urn:lsid:globalnames.org:index:b3b30b74-7f31-5c57-ab94-abad239a274a
Calliptamus tenuicercis Tarbinsky, 1930	species	1112901	Calliptamus tenuicercis	Tarbinskii, 1930	accepted	urn:lsid:faunaeur.org:taxname:402755		exact
Calliptamus wattenwylianus Pantel, 1896	species	1112909	Calliptamus wattenwylianus	(Pantel, 1896)	accepted	urn:lsid:faunaeur.org:taxname:402756		exact			1264382	urn:lsid:globalnames.org:index:6b1d8c58-577f-56fa-832d-c9f951c94b09
Canariola emarginata emarginata Newman, 1964	subspecies	1217234	Canariola emarginata	Newman, 1964	accepted	urn:lsid:faunaeur.org:taxname:403188		unbiased infra rank	As nominal subspecies in OSF		17810195	urn:lsid:globalnames.org:index:ad4a396d-64e4-5ba5-9e38-5b67e127bb5e
Canariola nubigena (Krauss, 1892)	species	1134735	Canariola nubigena	(Krauss, 1892)	accepted	urn:lsid:faunaeur.org:taxname:403189		exact
Canariola quinonesi Llucià Pomares & Iñiguez Yarza, 2010	species	1134737	Canariola quinonesi	Llucià-Pomares & Iñiguez Yarza, 2010	accepted	urn:lsid:faunaeur.org:taxname:403190		exact
Canariola willemsei Morales-Agacino, 1959	species	1134732	Canariola willemsei	Morales Agacino, 1959	accepted	urn:lsid:faunaeur.org:taxname:403191		exact			812430	urn:lsid:globalnames.org:index:946af496-cb5f-5db7-893e-edab2db4cd60
Celes variabilis variabilis (Pallas, 1771)	subspecies	1103554	Celes variabilis	(Pallas, 1771)	accepted	urn:lsid:faunaeur.org:taxname:402402		unbiased infra rank	As nominal subspecies in OSF
Ceraeocercus fuscipennis fuscipennis Uvarov, 1910	subspecies	1141924	Ceraeocercus fuscipennis	Uvarov, 1910	accepted	urn:lsid:faunaeur.org:taxname:403433		unbiased infra rank	As nominal subspecies in OSF		621980	urn:lsid:globalnames.org:index:0b45a509-12ce-559b-9fb8-6b46d6c867e6
Chorthippus (Glyptobothrus) acroleucus (Müller, 1924)	species	1105930	Chorthippus acroleucus	(Muller, 1924)	accepted	urn:lsid:faunaeur.org:taxname:402548		exact
Chorthippus (Chorthippus) albomarginatus albomarginatus (De Geer, 1773)	subspecies	1105775	Chorthippus albomarginatus	(De Geer, 1773)	accepted	urn:lsid:faunaeur.org:taxname:402549		near	Subgenus name correction. As nominal subspecies in OSF
Chorthippus (Glyptobothrus) alticola Ramme, 1921	species	1105992	Chorthippus alticola	Ramme, 1921	accepted	urn:lsid:faunaeur.org:taxname:402550		near	Subgenus name correction		673740	urn:lsid:globalnames.org:index:13d2e2a8-5011-5fb4-88d8-3ca87ade69a1
Chorthippus (Glyptobothrus) alticola alticola Ramme, 1921	subspecies	1105993	Chorthippus alticola alticola	Ramme, 1921	accepted	urn:lsid:faunaeur.org:taxname:402551		near	Subgenus name correction
Chorthippus (Glyptobothrus) alticola rammei (Ebner, 1928)	subspecies	1105994	Chorthippus alticola rammei	(Ebner, 1928)	accepted	urn:lsid:faunaeur.org:taxname:402552		near	Subgenus name correction
Chorthippus (Glyptobothrus) apicalis apicalis (Herrich-Schäffer, 1840)	subspecies	1105945	Chorthippus apicalis	(Herrich-Schäffer, 1840)	accepted	urn:lsid:faunaeur.org:taxname:402553		near	Subgenus name correction
Chorthippus (Glyptobothrus) apricarius apricarius (Linnaeus, 1758)	subspecies	1105950	Chorthippus apricarius	(Linnaeus, 1758)	accepted	urn:lsid:faunaeur.org:taxname:402554		near	Subgenus name correction. As nominal subspecies in OSF
Chorthippus (Glyptobothrus) ariasi (Bolívar, 1908)	species	1105931	Chorthippus ariasi	(Bolivar, 1908)	accepted	urn:lsid:faunaeur.org:taxname:402555		exact
Chorthippus (Glyptobothrus) biguttulus (Linnaeus, 1758)	species	1106017	Chorthippus biguttulus	(Linnaeus, 1758)	accepted	urn:lsid:faunaeur.org:taxname:402556		near	Subgenus name correction		11697345	urn:lsid:globalnames.org:index:4c1d78f9-a936-5267-a51d-fe9888ba050a
Chorthippus (Glyptobothrus) biguttulus biguttulus (Linnaeus, 1758)	subspecies	1106018	Chorthippus biguttulus biguttulus	(Linnaeus, 1758)	accepted	urn:lsid:faunaeur.org:taxname:402557		near	Subgenus name correction
Chorthippus (Glyptobothrus) biguttulus euhedickei Helversen, 1989	subspecies	1106031	Chorthippus biguttulus euhedickei	(Helversen, 1989)	accepted	urn:lsid:faunaeur.org:taxname:402558		near	Subgenus name correction		6072633	urn:lsid:globalnames.org:index:40b9e462-a95e-5f55-b0fc-2784d7c6dca0
Chorthippus (Glyptobothrus) binotatus binotatus (Charpentier, 1825)	subspecies	1106000	Chorthippus binotatus	(Charpentier, 1825)	accepted	urn:lsid:faunaeur.org:taxname:402559		near	Subgenus name correction. As nominal subspecies in OSF
Chorthippus (Glyptobothrus) biroi (Kuthy, 1907)	species	1105924	Chorthippus biroi	(Kuthy, 1907)	accepted	urn:lsid:faunaeur.org:taxname:402560		exact
Chorthippus (Glyptobothrus) bornhalmi Harz, 1971	species	1106051	Chorthippus bornhalmi	Harz, 1971	accepted	urn:lsid:faunaeur.org:taxname:402561		exact			673755	urn:lsid:globalnames.org:index:1df8a36c-034e-550e-b539-35d8ba08c098
Chorthippus (Glyptobothrus) brunneus brunneus (Thunberg, 1815)	subspecies	1106057	Chorthippus brunneus	(Thunberg, 1815)	accepted	urn:lsid:faunaeur.org:taxname:402562		near	Subgenus name correction. As nominal subspecies in OSF
Chorthippus (Chorthippus) karelini bruttius Fontana & La Greca, 1999	subspecies	1105793	Chorthippus bruttius	Fontana & La Greca, 1999	accepted	urn:lsid:faunaeur.org:taxname:402563		near	Subgenus & speciesname correction
Chorthippus (Glyptobothrus) cazurroi (Bolívar, 1898)	species	1105929	Chorthippus cazurroi	(Bolivar, 1898)	accepted	urn:lsid:faunaeur.org:taxname:402564		exact
Chorthippus (Glyptobothrus) chloroticus (Bolívar, 1908)	species	1105926	Chorthippus chloroticus	(Bolivar, 1908)	accepted	urn:lsid:faunaeur.org:taxname:402565		exact
Chorthippus cialancensis Nadig, 1986	species	1105823	Chorthippus cialancensis	Nadig, 1986	accepted	urn:lsid:faunaeur.org:taxname:402566		exact			809862	urn:lsid:globalnames.org:index:f1db28b7-d427-549f-b1a2-af5de6b562fa
Chorthippus (Glyptobothrus) corsicus (Chopard, 1924)	species	1105966	Chorthippus corsicus	(Chopard, 1923)	accepted	urn:lsid:faunaeur.org:taxname:402567		exact
Chorthippus (Glyptobothrus) crassiceps Ramme, 1926	species	1105927	Chorthippus crassiceps	(Ramme, 1926)	accepted	urn:lsid:faunaeur.org:taxname:402568		exact			673757	urn:lsid:globalnames.org:index:ef1c0f12-b2e0-50d6-ac8c-afe995008ae9
Chorthippus (Glyptobothrus) vagans cypriotus Uvarov, 1936	subspecies	1105972	Chorthippus cypriotus	Uvarov, 1936	accepted	urn:lsid:faunaeur.org:taxname:402569		near	Subgenus name correction. As nominal subspecies in OSF		809863	urn:lsid:globalnames.org:index:7ee8963c-c879-5d9e-a96b-f30bca5a3090
Chorthippus (Chorthippus) dichrous (Eversmann, 1859)	species	1105796	Chorthippus dichrous	(Eversmann, 1859)	accepted	urn:lsid:faunaeur.org:taxname:402570		exact
Chorthippus (Chorthippus) dorsatus dorsatus (Zetterstedt, 1821)	subspecies	1105803	Chorthippus dorsatus	(Zetterstedt, 1821)	accepted	urn:lsid:faunaeur.org:taxname:402571		near	Subgenus name correction. As nominal subspecies in OSF
Chorthippus (Glyptobothrus) dubius (Zubovski, 1898)	species	1105932	Chorthippus dubius	(Zubovskii, 1898)	accepted	urn:lsid:faunaeur.org:taxname:402572		exact
Chorthippus (Glyptobothrus) eisentrauti (Ramme, 1931)	species	1105934	Chorthippus eisentrauti	(Ramme, 1931)	accepted	urn:lsid:faunaeur.org:taxname:402573		exact
Chorthippus (Glyptobothrus) jacobsi Harz, 1975	species	1106053	Chorthippus jacobsi	Harz, 1975	accepted	urn:lsid:faunaeur.org:taxname:402574		exact			673754	urn:lsid:globalnames.org:index:2cecb4c3-f3c0-57cd-932b-d73e3ae534ae
Chorthippus (Chorthippus) jucundus (Fischer, 1853)	species	1105759	Chorthippus jucundus	(Fischer, 1853)	accepted	urn:lsid:faunaeur.org:taxname:402575		exact
Chorthippus (Glyptobothrus) jutlandica Fogh Nielsen, 2003	species	1105988	Chorthippus jutlandicus	Fogh Nielsen, 2003	accepted	urn:lsid:faunaeur.org:taxname:402576		near	Species name correction
Chorthippus (Chorthippus) karelini karelini (Uvarov, 1910)	subspecies	1105792	Chorthippus karelini	(Uvarov, 1910)	accepted	urn:lsid:faunaeur.org:taxname:402577		near	Subgenus name correction. As nominal subspecies in OSF
Chorthippus (Chorthippus) lacustris La Greca & Messina, 1975	species	1105773	Chorthippus lacustris	La Greca & Messina, 1975	accepted	urn:lsid:faunaeur.org:taxname:402578		exact
Chorthippus (Chorthippus) loratus (Fischer von Waldheim, 1846)	species	1105798	Chorthippus loratus	(Fischer de Waldheim, 1846)	accepted	urn:lsid:faunaeur.org:taxname:402579		exact
Chorthippus dessyi Jannone, 1936	synonym species	1105799	Chorthippus loratus	Jannone, 1936	is subjective synonym of	urn:lsid:faunaeur.org:taxname:402580	urn:lsid:faunaeur.org:taxname:402579	exact
Chorthippus (Glyptobothrus) marocanus Nadig, 1976	species	1106012	Chorthippus macrocerus	(Fischer de Waldheim, 1846)	accepted	urn:lsid:faunaeur.org:taxname:402581		near	Authorship & species name correction
Chorthippus (Glyptobothrus) maritimus maritimus Mishchenko, 1951	subspecies	1106042	Chorthippus maritimus	Mistshenko, 1951	accepted	urn:lsid:faunaeur.org:taxname:402582		near	Subgenus name correction. As nominal subspecies in OSF		6318312	urn:lsid:globalnames.org:index:b2a46114-f228-5891-bf28-ba40b4b26c23
Chorthippus (Glyptobothrus) miramae Ramme, 1939	species	1106054	Chorthippus maritimus	Ramme, 1951	is subjective synonym of	urn:lsid:faunaeur.org:taxname:402583	urn:lsid:faunaeur.org:taxname:402582	exact
Chorthippus miramaellus Woznessenskij, 1996	synonym species	1106055	Chorthippus maritimus	Woznessenskij, 1996	is subjective synonym of	urn:lsid:faunaeur.org:taxname:402584	urn:lsid:faunaeur.org:taxname:402582	exact
Chorthippus sinuatus Mishchenko & Woznessenskij, 1996	synonym species	1106044	Chorthippus maritimus	Mistshenko & Woznessenskij, 1996	is subjective synonym of	urn:lsid:faunaeur.org:taxname:402585	urn:lsid:faunaeur.org:taxname:402582	exact
Chorthippus (Glyptobothrus) mollis mollis (Charpentier, 1825)	subspecies	1106037	Chorthippus mollis	(Charpentier, 1825)	accepted	urn:lsid:faunaeur.org:taxname:402587		near	Subgenus name correction. As nominal subspecies in OSF
Chorthippus moreanus Willemse, Helversen & Odé, 2009	species	1106129	Chorthippus moreanus	Willemse, Helversen & Ode, 2009	accepted	urn:lsid:faunaeur.org:taxname:402590		exact
Chorthippus nevadensis Pascual, 1976	species	1105865	Chorthippus nevadensis	Pascual, 1978	accepted	urn:lsid:faunaeur.org:taxname:402591		exact			19162288	urn:lsid:globalnames.org:index:28a4e46f-62dc-5ace-af50-8ff3009badb1
Chorthippus nevadensis Pascual, 1976		1105865	Chorthippus nevadensis	Pascual, 1978	accepted	urn:lsid:faunaeur.org:taxname:402591		near	Subgenus name correction. As nominal subspecies in OSF		19162288	urn:lsid:globalnames.org:index:28a4e46f-62dc-5ace-af50-8ff3009badb1
Chorthippus (Chorthippus) oschei oschei Helversen, 1986	subspecies	1105789	Chorthippus oschei	Helversen, 1986	accepted	urn:lsid:faunaeur.org:taxname:402592		unbiased infra rank	As nominal subspecies in OSF
Chorthippus parnon Willemse, Helversen & Odé, 2009	species	1106130	Chorthippus parnon	Willemse, Helversen & Ode, 2009	accepted	urn:lsid:faunaeur.org:taxname:402598		exact
Chorthippus (Glyptobothrus) porphyropterus (Voroncovskij, 1928)	species	1105984	Chorthippus porphyropterus	(Vorontzovsky, 1928)	accepted	urn:lsid:faunaeur.org:taxname:402599		exact
Chorthippus (Glyptobothrus) pulloides Ramme, 1926	species	1105938	Chorthippus pulloides	(Ramme, 1926)	accepted	urn:lsid:faunaeur.org:taxname:402600		exact			673719	urn:lsid:globalnames.org:index:8bdc830f-e390-591b-b9f9-3814be5172b3
Chorthippus (Glyptobothrus) pullus (Philippi, 1830)	species	1105939	Chorthippus pullus	(Philippi, 1830)	accepted	urn:lsid:faunaeur.org:taxname:402601		exact
Chorthippus (Glyptobothrus) reissingeri Harz, 1972	species	1105965	Chorthippus reissingeri	Harz, 1972	accepted	urn:lsid:faunaeur.org:taxname:402602		exact			673748	urn:lsid:globalnames.org:index:98d000de-ce33-5853-a0f8-a4923501101e
Chorthippus (Glyptobothrus) rubratibialis Schmidt, 1978	species	1106013	Chorthippus rubratibialis	Schmidt, 1978	accepted	urn:lsid:faunaeur.org:taxname:402603		exact
Chorthippus sampeyrensis Nadig, 1986	species	1105878	Chorthippus sampeyrensis	Nadig, 1986	accepted	urn:lsid:faunaeur.org:taxname:402604		exact			673856	urn:lsid:globalnames.org:index:a6dbc78e-62f0-544b-92a3-7f62cc7d6261
Chorthippus (Glyptobothrus) sangiorgii (Finot, 1902)	species	1105942	Chorthippus sangiorgii	(Finot, 1902)	accepted	urn:lsid:faunaeur.org:taxname:402605		exact
Chorthippus (Glyptobothrus) saulcyi saulcyi (Krauss, 1888)	subspecies	1106009	Chorthippus saulcyi	(Krauss, 1888)	accepted	urn:lsid:faunaeur.org:taxname:456293		near	Subgenus name correction. As nominal subspecies in OSF
Pseudochorthippus tatrae (Harz, 1971)		1106353	Chorthippus tatrae	Harz, 1971	accepted	urn:lsid:faunaeur.org:taxname:402606		near	Genus name correction		673843	urn:lsid:globalnames.org:index:c043d94b-8775-5d14-bc63-6bab714ae5f5
			Chorthippus trinacriae	(La Greca, di Mauro, Viglianisi & Monelli, 2000)	accepted	urn:lsid:faunaeur.org:taxname:402607		no match	Gap
Chorthippus (Glyptobothrus) vagans (Eversmann, 1848)	species	1105971	Chorthippus vagans	(Eversmann, 1848)	accepted	urn:lsid:faunaeur.org:taxname:402608		near	Subgenus name correction
Chorthippus (Glyptobothrus) vagans cypriotus Uvarov, 1936	subspecies	1105972	Chorthippus vagans cypriotus	Uvarov, 1936	accepted	urn:lsid:faunaeur.org:taxname:402610		near	Subgenus name correction
Chorthippus (Glyptobothrus) vagans dissimilis Willemse, Helversen & Odé, 2009	subspecies	1105977	Chorthippus vagans dissimilis	Willemse, Helversen & Ode, 2009	accepted	urn:lsid:faunaeur.org:taxname:402611		near	Subgenus name correction
Chorthippus (Glyptobothrus) vagans vagans (Eversmann, 1848)	subspecies	1105973	Chorthippus vagans vagans	(Eversmann, 1848)	accepted	urn:lsid:faunaeur.org:taxname:402609		near	Subgenus name correction
Chorthippus (Glyptobothrus) willemsei Harz, 1971	species	1105943	Chorthippus willemsei	Harz, 1971	accepted	urn:lsid:faunaeur.org:taxname:402612		exact			673718	urn:lsid:globalnames.org:index:f784f233-e48e-5085-ae89-b6f2e0cc37c3
Chorthippus (Glyptobothrus) yersini Harz, 1975	species	1106014	Chorthippus yersini	Harz, 1975	accepted	urn:lsid:faunaeur.org:taxname:402613		exact			673758	urn:lsid:globalnames.org:index:2657c424-3a90-5129-bd7d-b877a5752b75
Chortopodisma cobellii (Krauss, 1883)	species	1110861	Chortopodisma cobellii	(Krauss, 1883)	accepted	urn:lsid:faunaeur.org:taxname:402732		exact
Chrysochraon beybienkoi Galvagni, 1968	species	1106357	Chrysochraon beybienkoi	Galvagni, 1968	accepted	urn:lsid:faunaeur.org:taxname:402545		exact			810096	urn:lsid:globalnames.org:index:505dabc0-a043-5c9f-a42c-e5043a816799
Chrysochraon dispar dispar (Germar, 1834)	subspecies	1106360	Chrysochraon dispar	(Germar, 1834)	accepted	urn:lsid:faunaeur.org:taxname:402547		unbiased infra rank	As nominal subspecies in OSF
Conocephalus (Conocephalus) chavesi (Bolívar, 1905)	species	1133506	Conocephalus chavesi	(Bolivar, 1905)	accepted	urn:lsid:faunaeur.org:taxname:403173		exact
Conocephalus (Anisoptera) concolor concolor (Burmeister, 1838)	subspecies	1133427	Conocephalus concolor	(Burmeister, 1839)	accepted	urn:lsid:faunaeur.org:taxname:403174		near	Subgenus name correction
Conocephalus (Anisoptera) concolor hispanicus Heller, 1988	subspecies	1133428	Conocephalus concolor hispanicus	Heller, 1988	accepted	urn:lsid:faunaeur.org:taxname:403175		near	Subgenus name correction		16961392	urn:lsid:globalnames.org:index:6ba24588-1daf-5f38-bdd5-5b1712e806d5
Conocephalus (Conocephalus) conocephalus (Linnaeus, 1767)	species	1133557	Conocephalus conocephalus	(Linnaeus, 1767)	accepted	urn:lsid:faunaeur.org:taxname:403176		exact
Conocephalus (Anisoptera) dorsalis (Latreille, 1804)	species	1133433	Conocephalus dorsalis	(Latreille, 1804)	accepted	urn:lsid:faunaeur.org:taxname:403177		exact
Conocephalus (Conocephalus) ebneri Harz, 1966	species	1133532	Conocephalus ebneri	Harz, 1966	accepted	urn:lsid:faunaeur.org:taxname:403178		exact			819056	urn:lsid:globalnames.org:index:8b272c06-1dce-5a24-a1c5-c561612b04ff
Conocephalus discolor Thunberg, 1815	synonym species	1133578	Conocephalus fuscus	Thunberg, 1815	is subjective synonym of	urn:lsid:faunaeur.org:taxname:403180	urn:lsid:faunaeur.org:taxname:403179	exact
Conocephalus (Conocephalus) grebenchikovi Uvarov, 1942	species	1133536	Conocephalus grebenchikovi	Uvarov, 1942	accepted	urn:lsid:faunaeur.org:taxname:403181		exact			819051	urn:lsid:globalnames.org:index:f335d62e-52c2-5656-9f97-e49f6859d1f5
Conocephalus (Anisoptera) hastatus hastatus (Charpentier, 1825)	subspecies	1133555	Conocephalus hastatus	(Charpentier, 1825)	accepted	urn:lsid:faunaeur.org:taxname:403182		near	Subgenus name correction. As nominal subspecies in OSF
Conocephalus (Conocephalus) kisi kisi Harz, 1967	subspecies	1133477	Conocephalus kisi	Harz, 1967	accepted	urn:lsid:faunaeur.org:taxname:403183		near	Subgenus name correction. As nominal subspecies in OSF		617487	urn:lsid:globalnames.org:index:971da31d-7167-5636-b0c1-bee3125ab88f
Conocephalus (Anisoptera) maculatus (Le Guillou, 1841)	species	1133389	Conocephalus maculatus	(Le Guillou, 1841)	accepted	urn:lsid:faunaeur.org:taxname:403184		exact
Cophopodisma pyrenaea (Fischer, 1853)	species	1110865	Cophopodisma pyrenaea	(Fischer, 1853)	accepted	urn:lsid:faunaeur.org:taxname:402729		exact
Cophopodisma ibera Ramme, 1951	species	1110864	Cophopodisma pyrenaea	Ramme, 1951	is subjective synonym of	urn:lsid:faunaeur.org:taxname:402730	urn:lsid:faunaeur.org:taxname:402729	exact
Coracinotus notarioi (Gomez Ladrón de Guevara, Pardo & Llorente del Moral, 1998)	species	1132541	Coracinotus notarioi	(Gómez, Pardo & Llorente, 1998)	accepted	urn:lsid:faunaeur.org:taxname:403142		exact
Coracinotus politus (Bolívar, 1901)	species	1132539	Coracinotus politus	(Bolivar, 1901)	accepted	urn:lsid:faunaeur.org:taxname:403147		exact
Coracinotus squamiferus (Bolívar, 1907)	species	1132540	Coracinotus squamiferus	Bolivar, 1907	accepted	urn:lsid:faunaeur.org:taxname:403150		exact
Corsteropleurus chopardi (Rungs, 1952)	species	1132543	Corsteropleurus chopardi	(Ebner, 1938)	accepted	urn:lsid:faunaeur.org:taxname:403134		exact
Ctenodecticus bolivari bolivari Targioni-Tozzetti, 1881	subspecies	1142902	Ctenodecticus bolivari	Targioni-Tozzetti, 1881	accepted	urn:lsid:faunaeur.org:taxname:403435		unbiased infra rank	As nominal subspecies in OSF		622190	urn:lsid:globalnames.org:index:8e39b93e-5d57-5d3d-85f9-cd570f381ebd
Ctenodecticus granatensis Pascual, 1978	species	1142910	Ctenodecticus granatensis	Pascual, 1978	accepted	urn:lsid:faunaeur.org:taxname:403436		exact			1264893	urn:lsid:globalnames.org:index:22296d09-6922-5405-8823-28e6e695bad0
Ctenodecticus lusitanicus Barranco & Pascual, 1992	species	1142911	Ctenodecticus lusitanicus	Barranco & Pascual, 1992	accepted	urn:lsid:faunaeur.org:taxname:403437		exact
Ctenodecticus major Pascual, 1978	species	1142912	Ctenodecticus major	Pascual, 1978	accepted	urn:lsid:faunaeur.org:taxname:403438		exact			1264900	urn:lsid:globalnames.org:index:0eda19d1-62cd-5782-9416-516c43776153
Ctenodecticus masferreri Bolívar, 1894	species	1142913	Ctenodecticus masferreri	Bolivar, 1894	accepted	urn:lsid:faunaeur.org:taxname:403439		exact
Ctenodecticus pupulus Bolívar, 1877	species	1142914	Ctenodecticus pupulus	Bolivar, 1876	accepted	urn:lsid:faunaeur.org:taxname:403440		exact
Ctenodecticus ramburi Morales-Agacino, 1956	species	1142915	Ctenodecticus ramburi	Morales Agacino, 1956	accepted	urn:lsid:faunaeur.org:taxname:403441		exact			1264904	urn:lsid:globalnames.org:index:97cdb03b-d384-5673-b0ed-779cd4a41f8e
Ctenodecticus thymi Olmo-Vidal, 1999	species	1142907	Ctenodecticus thymi	Olmo-Vidal, 1999	accepted	urn:lsid:faunaeur.org:taxname:403442		exact			1264902	urn:lsid:globalnames.org:index:3d211a11-d545-5b60-bc27-51919d0e7cf9
Cycloptiloides sp. 1 [temporary name]	temporary species	1128386	Cycloptiloides	Sjostedt, 1909	accepted	urn:lsid:faunaeur.org:taxname:403043	urn:lsid:faunaeur.org:taxname:403043	exact			12924759	urn:lsid:globalnames.org:index:b9c4fc65-f753-5cb4-baeb-a35d25f21b36
Cycloptiloides canariensis (Bolívar, 1914)	species	1128374	Cycloptiloides canariensis	(Bolivar, 1914)	accepted	urn:lsid:faunaeur.org:taxname:403045		exact
Cycloptiloides orientalis Chopard, 1925	species	1128378	Cycloptiloides orientalis	Chopard, 1925	accepted	urn:lsid:faunaeur.org:taxname:403044		exact			816879	urn:lsid:globalnames.org:index:b1ca6cb1-a968-50c7-9811-e5b6e6344e8c
Cyrtaspis scutata (Charpentier, 1825)	species	1134843	Cyrtaspis scutata	(Charpentier, 1825)	accepted	urn:lsid:faunaeur.org:taxname:403193		exact
Cyrtaspis tuberculata Barranco, 2005	species	1134845	Cyrtaspis tuberculata	Barranco, 2005	accepted	urn:lsid:faunaeur.org:taxname:403194		exact
Incertana decorata (Fieber, 1853)	species	1142604	Decorana decorata	(Fieber, 1853)	accepted	urn:lsid:faunaeur.org:taxname:403445		near	Genus name correction
Incertana drepanensis (Massa, Fontana & Buzzetti, 2006)	species	1142593	Decorana drepanensis	(Massa, Fontana & Buzzetti, 2006)	accepted	urn:lsid:faunaeur.org:taxname:403446		near	Genus name correction
Incertana incerta (Brunner von Wattenwyl, 1882)	species	1142596	Decorana incerta	(Brunner von Wattenwyl, 1882)	accepted	urn:lsid:faunaeur.org:taxname:403589		near	Genus name correction
Decticus albifrons (Fabricius, 1775)	species	1142922	Decticus albifrons	(Fabricius, 1775)	accepted	urn:lsid:faunaeur.org:taxname:403448		exact
Decticus loudoni Ramme, 1933	species	1142936	Decticus loudoni	Ramme, 1933	accepted	urn:lsid:faunaeur.org:taxname:403449		exact			622144	urn:lsid:globalnames.org:index:6edbe5b6-5c1e-50d9-9971-03619e034401
Decticus verrucivorus assiduus Ingrisch, Willemse & Heller, 1992	subspecies	1142931	Decticus verrucivorus assiduus	Ingrisch, F. Willemse & Heller, 1992	accepted	urn:lsid:faunaeur.org:taxname:403452		near	Authorship correction
Decticus verrucivorus verrucivorus (Linnaeus, 1758)	subspecies	1142925	Decticus verrucivorus verrucivorus	(Linnaeus, 1758)	accepted	urn:lsid:faunaeur.org:taxname:403451		exact
Tetrix depressa Brisout de Barneville, 1848	species	1102172	Depressotetrix depressus	(Brisout de Barneville, 1849)	accepted	urn:lsid:faunaeur.org:taxname:402290		near	Genus name correction
Dericorys carthagonovae Bolívar, 1897	species	1117736	Dericorys carthagonovae	Bolivar, 1877	accepted	urn:lsid:faunaeur.org:taxname:402647		exact
Dericorys lobata lobata (Brullé, 1840)	subspecies	1117757	Dericorys lobata	(Brullé, 1840)	accepted	urn:lsid:faunaeur.org:taxname:402648		unbiased infra rank	As nominal subspecies in OSF
Dericorys tibialis (Pallas, 1773)	species	1117746	Dericorys tibialis	(Pallas, 1773)	accepted	urn:lsid:faunaeur.org:taxname:402649		exact
Petaloptila (Petaloptila) clauseri (Schmidt, 1991)	species	1123911	Discoptila clauseri	Schmidt, 1991	accepted	urn:lsid:faunaeur.org:taxname:402973		near	(Sub)genus name correction		16966109	urn:lsid:globalnames.org:index:307f0ffa-78e2-504b-8454-324cd465cd48
Petaloptila (Petaloptila) fragosoi (Bolívar, 1885)	species	1123912	Discoptila fragosoi	(Bolivar, 1885)	accepted	urn:lsid:faunaeur.org:taxname:402974		near	(Sub)genus name correction
Petaloptila (Petaloptila) sbordonii (Baccetti, 1979)	species	1123914	Discoptila sbordonii	Baccetti, 1979	accepted	urn:lsid:faunaeur.org:taxname:402975		near	(Sub)genus name correction		818430	urn:lsid:globalnames.org:index:f74c4365-625a-54f9-bd46-c477ddf9a219
Dociostaurus (Kazakia) brevicollis (Eversmann, 1848)	species	1105587	Dociostaurus brevicollis	(Eversmann, 1848)	accepted	urn:lsid:faunaeur.org:taxname:402535		exact
Dociostaurus (Stauronotulus) crassiusculus crassiusculus (Pantel, 1886)	subspecies	1105602	Dociostaurus crassiusculus	(Pantel, 1886)	accepted	urn:lsid:faunaeur.org:taxname:402536		near	Subgenus name correction. As nominal subspecies in OSF
Dociostaurus (Kazakia) genei genei (Ocskay, 1832)	subspecies	1105590	Dociostaurus genei	(Ocskay, 1833)	accepted	urn:lsid:faunaeur.org:taxname:402537		near	Subgenus name correction. As nominal subspecies in OSF
Dociostaurus (Dociostaurus) hispanicus Bolívar, 1898	species	1105580	Dociostaurus hispanicus	Bolivar, 1898	accepted	urn:lsid:faunaeur.org:taxname:402538		exact
Dociostaurus monserrati García & Presa, 1984	synonym species	1105597	Dociostaurus jagoi	Garcia & Presa, 1984	is subjective synonym of	urn:lsid:faunaeur.org:taxname:402541	urn:lsid:faunaeur.org:taxname:402540	exact
Dociostaurus (Stauronotulus) kraussi (Ingenitskii, 1897)	species	1105605	Dociostaurus kraussi	(Ingenizkij, 1897)	accepted	urn:lsid:faunaeur.org:taxname:402539		exact
Dociostaurus (Dociostaurus) maroccanus (Thunberg, 1815)	species	1105560	Dociostaurus maroccanus	(Thunberg, 1815)	accepted	urn:lsid:faunaeur.org:taxname:402542		exact
Dociostaurus (Dociostaurus) minutus La Greca, 1962	species	1105567	Dociostaurus minutus	La Greca, 1962	accepted	urn:lsid:faunaeur.org:taxname:402543		exact			809662	urn:lsid:globalnames.org:index:02674b6d-dace-50a5-a183-22ebf405e9c5
Dociostaurus (Kazakia) tartarus Stshelkanovtzev, 1921	species	1105571	Dociostaurus tartarus	Uvarov, 1921	accepted	urn:lsid:faunaeur.org:taxname:402544		exact
Dolichopoda (Capraiacris) aegilion Baccetti, 1977	species	1129834	Dolichopoda aegilion	Baccetti, 1977	accepted	urn:lsid:faunaeur.org:taxname:402869		exact			941151	urn:lsid:globalnames.org:index:69170d4b-20b1-54d0-a001-1d6a1a8edcfb
Dolichopoda (Dolichopoda) annae Boudou-Saltet, 1973	species	1129847	Dolichopoda annae	Boudou-Saltet, 1973	accepted	urn:lsid:faunaeur.org:taxname:402870		exact			941158	urn:lsid:globalnames.org:index:87fe9c3b-a0dc-5267-8feb-31775407507c
Dolichopoda (Dolichopoda) araneiformis (Burmeister, 1838)	species	1129849	Dolichopoda araneiformis	(Burmeister, 1838)	accepted	urn:lsid:faunaeur.org:taxname:402871		exact
Dolichopoda (Dolichopoda) azami Saulcy, 1893	species	1129850	Dolichopoda azami	Saulcy, 1893	accepted	urn:lsid:faunaeur.org:taxname:402872		near	Subgenus name correction		941162	urn:lsid:globalnames.org:index:0ed06979-0dd9-5f16-8a11-1a85b73cc187
Dolichopoda (Capraiacris) baccettii Capra, 1957	species	1129835	Dolichopoda baccettii	Capra, 1957	accepted	urn:lsid:faunaeur.org:taxname:402873		exact			941152	urn:lsid:globalnames.org:index:4b212fbc-73ec-59dc-ae6c-3e3bd034e504
Dolichopoda (Dolichopoda) bolivari Chopard, 1916	species	1129852	Dolichopoda bolivari	Chopard, 1915	accepted	urn:lsid:faunaeur.org:taxname:402874		exact
Dolichopoda (Chopardina) bormansi Brunner von Wattenwyl, 1882	species	1129837	Dolichopoda bormansi	Brunner von Wattenwyl, 1882	accepted	urn:lsid:faunaeur.org:taxname:402875		exact			941153	urn:lsid:globalnames.org:index:a29a2753-44ba-544e-8d14-3a7094c7f9a5
Dolichopoda calabra Galvagni, 1968	synonym species	1129853	Dolichopoda calabra	Galvagni, 1968	accepted	urn:lsid:faunaeur.org:taxname:402876		exact			941164	urn:lsid:globalnames.org:index:b52f4d9b-e5c4-5591-8c2c-94258fec7299
Dolichopoda (Dolichopoda) calidnae Rampini & Di Russo, 2012	species	1129893	Dolichopoda calidnae	Rampini & di Russo, 2012	accepted	urn:lsid:faunaeur.org:taxname:454696		exact
Dolichopoda (Dolichopoda) capreensis Capra, 1968	species	1129854	Dolichopoda capreensis	Capra, 1968	accepted	urn:lsid:faunaeur.org:taxname:402878		exact			941165	urn:lsid:globalnames.org:index:ee84bbc8-cd08-5e64-a018-de10a7a711cb
Dolichopoda (Petrochilosina) cassagnaui Boudou-Saltet, 1971	species	1129898	Dolichopoda cassagnaui	Boudou-Saltet, 1971	accepted	urn:lsid:faunaeur.org:taxname:402877		exact			19213318	urn:lsid:globalnames.org:index:ce083219-db58-580b-bb03-a993a14a7fb7
Dolichopoda (Dolichopoda) chopardi Baccetti, 1966	species	1129855	Dolichopoda chopardi	Baccetti, 1966	accepted	urn:lsid:faunaeur.org:taxname:402879		exact			941166	urn:lsid:globalnames.org:index:bec8f300-1c96-5f89-845a-36cb02ed71f1
Dolichopoda (Chopardina) cyrnensis Chopard, 1950	species	1129839	Dolichopoda cyrnensis	Chopard, 1950	accepted	urn:lsid:faunaeur.org:taxname:402880		exact			941154	urn:lsid:globalnames.org:index:14dfb4fd-3af8-52a7-97db-97b7425939ad
Dolichopoda (Dolichopoda) dalensi Boudou-Saltet, 1972	species	1129856	Dolichopoda dalensi	Boudou-Saltet, 1972	accepted	urn:lsid:faunaeur.org:taxname:402881		exact			941167	urn:lsid:globalnames.org:index:f4d6c460-ca84-5bb6-b6c9-788e25b9f221
Dolichopoda (Dolichopoda) geniculata geniculata (Costa, 1860)	subspecies	1129870	Dolichopoda geniculata	(Costa, 1860)	accepted	urn:lsid:faunaeur.org:taxname:402882		near	Subgenus name correction. As nominal subspecies in OSF
Dolichopoda (Dolichopoda) giulianae Rampini & Di Russo, 2012	species	1129891	Dolichopoda giulianae	Rampini & di Russo, 2012	accepted	urn:lsid:faunaeur.org:taxname:454694		exact
Dolichopoda (Dolichopoda) graeca Chopard, 1964	species	1129858	Dolichopoda graeca	Chopard, 1964	accepted	urn:lsid:faunaeur.org:taxname:402883		exact			941170	urn:lsid:globalnames.org:index:4e7d6502-cb04-55b4-869f-e3f53d43b7ca
Dolichopoda (Dolichopoda) hussoni Chopard, 1934	species	1129859	Dolichopoda hussoni	Chopard, 1934	accepted	urn:lsid:faunaeur.org:taxname:402884		exact			941171	urn:lsid:globalnames.org:index:054ca3e1-e1d5-5892-8a27-81d621a96ac1
Dolichopoda (Petrochilosina) insignis Chopard, 1955	species	1129895	Dolichopoda insignis	Chopard, 1955	accepted	urn:lsid:faunaeur.org:taxname:402885		exact			941172	urn:lsid:globalnames.org:index:0e012347-36c5-5a2e-8b52-7284b86182c1
Dolichopoda (Dolichopoda) kalithea Di Russo & Rampini, 2012	species	1129892	Dolichopoda kalithea	Di Russo & Rampini, 2012	accepted	urn:lsid:faunaeur.org:taxname:454695		exact
Dolichopoda (Dolichopoda) laetitiae laetitiae Minozzi, 1920	subspecies	1223660	Dolichopoda laetitiae	Minozzi, 1920	accepted	urn:lsid:faunaeur.org:taxname:402886		near	Subgenus name correction. As nominal subspecies in OSF		616812	urn:lsid:globalnames.org:index:2fc07c85-43de-56ae-92e5-f3b4adb43f49
Dolichopoda (Dolichopoda) azami ligustica Baccetti & Capra, 1959	subspecies	1129873	Dolichopoda ligustica	Baccetti & Capra, 1958	accepted	urn:lsid:faunaeur.org:taxname:402887		near	Subgenus & speciesname correction
Dolichopoda (Dolichopoda) linderii (Dufour, 1861)	species	1129860	Dolichopoda linderi	(Dufour, 1861)	accepted	urn:lsid:faunaeur.org:taxname:402888		phonetic	Misspelling species name
Dolichopoda (Petrochilosina) makrykapa Boudou-Saltet, 1980	species	1129896	Dolichopoda makrykapa	Boudou-Saltet, 1980	accepted	urn:lsid:faunaeur.org:taxname:402889		exact			941174	urn:lsid:globalnames.org:index:c2e987f9-b324-5b8d-be6c-b7120dcf277c
Dolichopoda (Dolichopoda) matsakisi Boudou-Saltet, 1972	species	1129861	Dolichopoda matsakisi	Boudou-Saltet, 1972	accepted	urn:lsid:faunaeur.org:taxname:402890		exact			941175	urn:lsid:globalnames.org:index:801f8f59-2863-54d4-9e1b-4c15049ae7d6
Dolichopoda (Chopardina) muceddai Rampini & Di Russo, 2005	species	1129844	Dolichopoda muceddai	Rampini & di Russo, 2005	accepted	urn:lsid:faunaeur.org:taxname:402891		exact
Dolichopoda (Dolichopoda) naxia Boudou-Saltet, 1973	species	1129862	Dolichopoda naxia	Boudou-Saltet, 1972	accepted	urn:lsid:faunaeur.org:taxname:402892		exact			941176	urn:lsid:globalnames.org:index:2acbffff-a113-5daf-b69b-5205d6ffce5c
Dolichopoda (Dolichopoda) palpata (Sulzer, 1776)	species	1129876	Dolichopoda palpata	(Sulzer, 1776)	accepted	urn:lsid:faunaeur.org:taxname:402893		exact
Dolichopoda (Dolichopoda) paraskevi Boudou-Saltet, 1973	species	1129863	Dolichopoda paraskevi	Boudou-Saltet, 1973	accepted	urn:lsid:faunaeur.org:taxname:402894		exact			941177	urn:lsid:globalnames.org:index:93342544-a91b-5394-b4e5-9feeb78fd1fa
Dolichopoda (Dolichopoda) patrizii Chopard, 1964	species	1129864	Dolichopoda patrizii	Chopard, 1964	accepted	urn:lsid:faunaeur.org:taxname:402895		exact			941178	urn:lsid:globalnames.org:index:7f84e84b-d5c4-5510-b5fa-979422057ca7
Dolichopoda (Dolichopoda) pavesii Galvagni, 2002	species	1129881	Dolichopoda pavesii	Galvagni, 2002	accepted	urn:lsid:faunaeur.org:taxname:402896		exact			941193	urn:lsid:globalnames.org:index:412fee4f-05a4-537c-bee1-80ad36fda562
Dolichopoda (Petrochilosina) petrochilosi Chopard, 1954	species	1129899	Dolichopoda petrochilosi	Chopard, 1954	accepted	urn:lsid:faunaeur.org:taxname:402897		exact			941191	urn:lsid:globalnames.org:index:5e4e303c-416f-5456-b52e-89b4092b7cba
Dolichopoda (Chopardina) remyi Chopard, 1934	species	1129840	Dolichopoda remyi	Chopard, 1934	accepted	urn:lsid:faunaeur.org:taxname:402898		exact			941155	urn:lsid:globalnames.org:index:b283e2fa-4d2d-5d79-8ade-67b099cb8b3f
Dolichopoda (Chopardina) schiavazzii schiavazzii Capra, 1934	subspecies	1129843	Dolichopoda schiavazzii	Capra, 1934	accepted	urn:lsid:faunaeur.org:taxname:402899		near	Subgenus name correction. As nominal subspecies in OSF		616806	urn:lsid:globalnames.org:index:bbf92c65-efff-5a54-b9ec-e2f508a7cf7a
Dolichopoda (Dolichopoda) steriotisi Boudou-Saltet, 1973	species	1129866	Dolichopoda steriotisi	Boudou-Saltet, 1972	accepted	urn:lsid:faunaeur.org:taxname:402900		exact			941181	urn:lsid:globalnames.org:index:30cb3215-9bd2-5412-8632-9e7ac0fb983c
Dolichopoda (Dolichopoda) thasosensis Chopard, 1964	species	1129867	Dolichopoda thasosensis	Chopard, 1964	accepted	urn:lsid:faunaeur.org:taxname:402901		exact			941182	urn:lsid:globalnames.org:index:d1f48d2c-7aad-529e-b2db-d207f0cbf8c7
Dolichopoda (Dolichopoda) unicolor Chopard, 1964	species	1129868	Dolichopoda unicolor	Chopard, 1964	accepted	urn:lsid:faunaeur.org:taxname:402902		exact			941183	urn:lsid:globalnames.org:index:0aeea221-b8a2-5843-a48a-3ba063aaef4b
Dolichopoda (Petrochilosina) vandeli Boudou-Saltet, 1970	species	1129897	Dolichopoda vandeli	Boudou-Saltet, 1970	accepted	urn:lsid:faunaeur.org:taxname:402903		exact			941190	urn:lsid:globalnames.org:index:33374c5c-a263-5c50-9eee-519cfb022944
Drymadusa dorsalis dorsalis (Brullé, 1832)	subspecies	1222212	Drymadusa dorsalis	(Brullé, 1832)	accepted	urn:lsid:faunaeur.org:taxname:403453		unbiased infra rank	As nominal subspecies in OSF
Duroniella carinata Mishchenko, 1951	species	1103345	Duroniella carinata	Mistshenko, 1951	accepted	urn:lsid:faunaeur.org:taxname:402396		exact
Duroniella fracta (Krauss, 1890)	species	1103347	Duroniella fracta	(Krauss, 1890)	accepted	urn:lsid:faunaeur.org:taxname:402397		exact
Duroniella kalmyka (Adelung, 1906)	species	1103351	Duroniella kalmyka	(Adelung, 1906)	accepted	urn:lsid:faunaeur.org:taxname:402398		exact
Duroniella laticornis (Krauss, 1909)	species	1103354	Duroniella laticornis	(Krauss, 1909)	accepted	urn:lsid:faunaeur.org:taxname:402399		exact
Duroniella lucasii (Bolívar, 1881)	species	1103356	Duroniella lucasii	(Bolivar, 1881)	accepted	urn:lsid:faunaeur.org:taxname:402400		exact
Egnatioides desertus desertus Uvarov, 1926	subspecies	1109696	Egnatioides desertus	Uvarov, 1926	accepted	urn:lsid:faunaeur.org:taxname:402642		unbiased infra rank	As nominal subspecies in OSF		674936	urn:lsid:globalnames.org:index:eccd93e2-9b43-5037-887b-c2a9d2f4b53b
Egnatius apicalis Stål, 1876	species	1109699	Egnatius apicalis	Stal, 1876	accepted	urn:lsid:faunaeur.org:taxname:402644		exact			815928	urn:lsid:globalnames.org:index:67789c66-c075-5cc9-878d-043592ae0251
Epacromius coerulipes (Ivanov, 1888)	species	1103426	Epacromius coerulipes	(Ivanov, 1887)	accepted	urn:lsid:faunaeur.org:taxname:402392		exact
Epacromius pulverulentus (Fischer von Waldheim, 1846)	species	1103429	Epacromius pulverulentus	(Fischer de Waldheim, 1846)	accepted	urn:lsid:faunaeur.org:taxname:402393		exact
Epacromius tergestinus tergestinus (Megerle von Mühlfeld, 1825)	subspecies	1103431	Epacromius tergestinus	(Charpentier, 1825)	accepted	urn:lsid:faunaeur.org:taxname:402394		near	Authorship correction. As nominal subspecies in OSF
Ephippiger apulus apulus (Ramme, 1933)	subspecies	1132338	Ephippiger apulus	(Ramme, 1933)	accepted	urn:lsid:faunaeur.org:taxname:403086		unbiased infra rank	As nominal subspecies in OSF
Ephippiger camillae Fontana & Massa, 2000	species	1132388	Ephippiger camillae	Fontana & Massa, 2000	accepted	urn:lsid:faunaeur.org:taxname:403088		exact
Ephippiger carlottae Fontana & Odé, 2003	species	1132389	Ephippiger carlottae	Fontana & Ode, 2003	accepted	urn:lsid:faunaeur.org:taxname:403089		exact
Ephippiger cavannai Targioni-Tozzetti, 1881	species	1132340	Ephippiger cavannae	(Targioni-Tozzetti, 1881)	accepted	urn:lsid:faunaeur.org:taxname:403087		near	Misspelling genus name
Ephippiger discoidalis Fieber, 1853	species	1132343	Ephippiger discoidalis	Fieber, 1853	accepted	urn:lsid:faunaeur.org:taxname:403090		exact			941715	urn:lsid:globalnames.org:index:8d1d7d90-2775-50cf-b428-51ceea52c788
Ephippiger ephippiger ephippiger (Fiebig, 1784)	subspecies	1132353	Ephippiger ephippiger	(Fiebig, 1784)	accepted	urn:lsid:faunaeur.org:taxname:403091		unbiased infra rank	As nominal subspecies in OSF
Ephippiger perforatus (Rossius, 1790)	species	1132386	Ephippiger perforatus	(Rossius, 1790)	accepted	urn:lsid:faunaeur.org:taxname:403092		exact
Ephippiger provincialis Yersin, 1854	species	1132373	Ephippiger provincialis	(Yersin, 1854)	accepted	urn:lsid:faunaeur.org:taxname:403093		exact			941721	urn:lsid:globalnames.org:index:fdf83ed1-f01f-5e7c-ba78-5f2b69c3eaab
Ephippiger ruffoi Galvagni, 1955	species	1132375	Ephippiger ruffoi	Galvagni, 1955	accepted	urn:lsid:faunaeur.org:taxname:403094		exact			941722	urn:lsid:globalnames.org:index:b5e5eb2b-b911-5a78-964a-591b8af2cbfb
Ephippiger zelleri Fischer, 1853	species	1132384	Ephippiger zelleri	(Fischer, 1853)	accepted	urn:lsid:faunaeur.org:taxname:403096		exact			941725	urn:lsid:globalnames.org:index:d1775236-4b45-52b0-b970-4dce4ffeb042
Ephippiger melisi Baccetti, 1959	species	1132385	Ephippiger zelleri melisi	Baccetti, 1958	accepted	urn:lsid:faunaeur.org:taxname:403098		near	Species name correction
Ephippiger zelleri Fischer, 1853	species	1132384	Ephippiger zelleri zelleri	(Fischer, 1853)	accepted	urn:lsid:faunaeur.org:taxname:403097		exact			1985489	urn:lsid:globalnames.org:index:acefc5b8-a99a-5301-87e2-c53cb735d830
Ephippigerida (Ephippigerida) areolaria (Bolívar, 1877)	species	1132392	Ephippigerida areolaria	(Bolivar, 1877)	accepted	urn:lsid:faunaeur.org:taxname:403100		exact
Ephippigerida (Ephippigerida) asella Navás, 1907	species	1132393	Ephippigerida asella	(Navàs, 1907)	accepted	urn:lsid:faunaeur.org:taxname:403101		exact
Ephippigerida (Ephippigerida) carinata (Bolívar, 1877)	species	1132394	Ephippigerida carinata	(Bolivar, 1877)	accepted	urn:lsid:faunaeur.org:taxname:403102		exact
Ephippigerida (Ephippigerida) diluta (Bolívar, 1878)	species	1132399	Ephippigerida diluta	(Bolivar, 1878)	accepted	urn:lsid:faunaeur.org:taxname:403135		exact
Ephippigerida (Ephippigerida) longicauda (Bolívar, 1873)	species	1132395	Ephippigerida longicauda	(Bolivar, 1873)	accepted	urn:lsid:faunaeur.org:taxname:403104		exact
Ephippigerida (Ephippigerida) marceti Navás, 1907	species	1132396	Ephippigerida marceti	(Navàs, 1907)	accepted	urn:lsid:faunaeur.org:taxname:403105		exact
Ephippigerida (Ephippigerida) pantingana (Navás, 1904)	species	1132397	Ephippigerida pantingana	(Navàs, 1904)	accepted	urn:lsid:faunaeur.org:taxname:403107		exact
Ephippigerida (Ephippigerida) saussuriana (Bolívar, 1878)	species	1132401	Ephippigerida saussuriana	(Bolivar, 1878)	accepted	urn:lsid:faunaeur.org:taxname:403109		exact
Epipodisma pedemontana pedemontana (Brunner von Wattenwyl, 1882)	subspecies	1110873	Epipodisma pedemontana	(Brunner von Wattenwyl, 1882)	accepted	urn:lsid:faunaeur.org:taxname:402728		unbiased infra rank	As nominal subspecies in OSF
Eremippus costatus Tarbinsky, 1927	species	1105646	Eremippus costatus	Tarbinskii, 1927	accepted	urn:lsid:faunaeur.org:taxname:402532		exact
Eremippus miramae Bey-Bienko & Mishchenko, 1951	synonym species	1105620	Eremippus miramae	Tarbinskii, 1927	accepted	urn:lsid:faunaeur.org:taxname:402533		exact
Eremippus mirami Tarbinsky, 1927	species	1105619	Eremippus miramae	Tarbinskii, 1927	accepted	urn:lsid:faunaeur.org:taxname:402533		phonetic	Species name correction
Eremippus simplex simplex (Eversmann, 1859)	subspecies	1105655	Eremippus simplex	(Eversmann, 1859)	accepted	urn:lsid:faunaeur.org:taxname:402534		unbiased infra rank	As nominal subspecies in OSF
Euchorthippus albolineatus siculus Ramme, 1927	subspecies	1106507	Euchorthippus albolineatus siculus	Ramme, 1927	accepted	urn:lsid:faunaeur.org:taxname:402524		exact			16784658	urn:lsid:globalnames.org:index:3c336623-e018-58f8-a403-c2612a31c275
Euchorthippus angustulus Ramme, 1931	species	1106479	Euchorthippus angustulus	Ramme, 1931	accepted	urn:lsid:faunaeur.org:taxname:402525		exact			810014	urn:lsid:globalnames.org:index:3f3df70e-0c7b-5fba-8c59-9e624ae946cc
Euchorthippus chopardi Descamps, 1968	species	1106484	Euchorthippus chopardi	Descamps, 1968	accepted	urn:lsid:faunaeur.org:taxname:402526		exact			810020	urn:lsid:globalnames.org:index:5443a6d3-03e9-5db3-9c48-540fd9548f81
Euchorthippus declivus (Brisout de Barneville, 1848)	species	1106487	Euchorthippus declivus	(Brisout de Barneville, 1848)	accepted	urn:lsid:faunaeur.org:taxname:402527		exact
Euchorthippus elegantulus elegantulus Zeuner, 1940	subspecies	1106516	Euchorthippus elegantulus	Zeuner, 1940	accepted	urn:lsid:faunaeur.org:taxname:402528		unbiased infra rank	As nominal subspecies in OSF		668866	urn:lsid:globalnames.org:index:a2e9ced2-41ba-5305-9046-bbc7cb8f1c1a
Euchorthippus madeirae Uvarov, 1935	species	1106494	Euchorthippus madeirae	Uvarov, 1935	accepted	urn:lsid:faunaeur.org:taxname:402529		exact			810029	urn:lsid:globalnames.org:index:d81d0b10-46d3-510b-b14d-1351b46aa741
Euchorthippus pulvinatus pulvinatus (Fischer von Waldheim, 1846)	subspecies	1106509	Euchorthippus pulvinatus	(Fischer de Waldheim, 1846)	accepted	urn:lsid:faunaeur.org:taxname:402530		unbiased infra rank	As nominal subspecies in OSF
Euchorthippus sardous Nadig, 1934	species	1106497	Euchorthippus sardous	Nadig in Nadig & Nadig, 1934	accepted	urn:lsid:faunaeur.org:taxname:402531		unbiased infra rank	As nominal subspecies in OSF
Eugryllodes escalerae escalerae (Bolívar, 1894)	subspecies	1124019	Eugryllodes escalerae	(Bolivar, 1894)	accepted	urn:lsid:faunaeur.org:taxname:403013		unbiased infra rank	As nominal subspecies in OSF
Eugryllodes littoreus (Bolívar, 1885)	species	1124005	Eugryllodes littoreus	(Bolivar, 1895)	accepted	urn:lsid:faunaeur.org:taxname:403014		exact
Eugryllodes pipiens panteli (Cazurro y Ruiz, 1888)	subspecies	1124017	Eugryllodes panteli	(Cazurro, 1888)	accepted	urn:lsid:faunaeur.org:taxname:403015		unbiased infra rank	As nominal subspecies in OSF
Eugryllodes pipiens pipiens (Dufour, 1820)	subspecies	1124009	Eugryllodes pipiens	(Dufour, 1820)	accepted	urn:lsid:faunaeur.org:taxname:403016		unbiased infra rank	As nominal subspecies in OSF
Eumigus ayresi Bolívar, 1912	species	1116803	Eumigus ayresi	Bolivar, 1912	accepted	urn:lsid:faunaeur.org:taxname:402801		exact			6397544	urn:lsid:globalnames.org:index:3049f65e-f26d-53e2-8376-705a1039ca5d
Eumigus cucullatus cucullatus (Bolívar, 1878)	subspecies	1116805	Eumigus cucullatus	(Bolivar, 1878)	accepted	urn:lsid:faunaeur.org:taxname:402802		unbiased infra rank	As nominal subspecies in OSF		6397545	urn:lsid:globalnames.org:index:228cb0a0-3210-54d3-ae6b-c77862f1e1aa
Eumigus monticola (Rambur, 1838)	species	1116807	Eumigus monticolus	(Rambur, 1838)	accepted	urn:lsid:faunaeur.org:taxname:402803		near	Species name correction
Eumigus punctatus punctatus (Bolívar, 1902)	subspecies	1116811	Eumigus punctatus	(Bolivar, 1902)	accepted	urn:lsid:faunaeur.org:taxname:402804		unbiased infra rank	As nominal subspecies in OSF
Eumigus rubioi Harz, 1973	species	1116809	Eumigus rubioi	Harz, 1973	accepted	urn:lsid:faunaeur.org:taxname:402805		exact			807894	urn:lsid:globalnames.org:index:011a408f-7de3-5da5-8de8-349970544dff
Eumodicogryllus bordigalensis bordigalensis (Latreille, 1804)	subspecies	1122976	Eumodicogryllus bordigalensis	(Latreille, 1804)	accepted	urn:lsid:faunaeur.org:taxname:403010		unbiased infra rank	As nominal subspecies in OSF
Eumodicogryllus theryi (Chopard, 1943)	species	1122973	Eumodicogryllus theryi	(Chopard, 1943)	accepted	urn:lsid:faunaeur.org:taxname:403011		exact
Eupholidoptera annamariae Nadig, 1985	species	1143031	Eupholidoptera annamariae	Nadig, 1985	accepted	urn:lsid:faunaeur.org:taxname:403455		exact			1264231	urn:lsid:globalnames.org:index:43e8d331-9d1a-590b-b276-5a1abc8f04f3
Eupholidoptera astyla (Ramme, 1927)	species	1143030	Eupholidoptera astyla	(Ramme, 1927)	accepted	urn:lsid:faunaeur.org:taxname:403457		exact
Eupholidoptera cephalonica Willemse & Willemse, 2004	species	1142958	Eupholidoptera cephalonica	F. Willemse & L. Willemse, 2004	accepted	urn:lsid:faunaeur.org:taxname:403458		exact
Eupholidoptera beybienkoi Peshev, 1962	synonym species	1142964	Eupholidoptera chabrieri	Peshev, 1962	is subjective synonym of	urn:lsid:faunaeur.org:taxname:403460	urn:lsid:faunaeur.org:taxname:403459	exact
Eupholidoptera marani Peshev, 1960	synonym species	1142965	Eupholidoptera chabrieri	Peshev, 1960	is subjective synonym of	urn:lsid:faunaeur.org:taxname:403461	urn:lsid:faunaeur.org:taxname:403459	exact
Eupholidoptera cretica Ramme, 1951	species	1143032	Eupholidoptera cretica	Ramme, 1951	accepted	urn:lsid:faunaeur.org:taxname:403462		exact			1264247	urn:lsid:globalnames.org:index:af531f31-b65f-51a9-9506-b6cbd42ee699
Eupholidoptera danconai La Greca, 1959	species	1142979	Eupholidoptera danconai	La Greca, 1959	accepted	urn:lsid:faunaeur.org:taxname:403464		exact			622495	urn:lsid:globalnames.org:index:ad522b39-4fc9-5954-953b-db5fabd78808
Eupholidoptera epirotica (Ramme, 1927)	species	1142972	Eupholidoptera epirotica	(Ramme, 1927)	accepted	urn:lsid:faunaeur.org:taxname:403465		exact
Eupholidoptera feri Koçak & Kemal, 2010	species	1143028	Eupholidoptera feri	Koçak & Kemal, 2010	accepted	urn:lsid:faunaeur.org:taxname:403481		exact
Eupholidoptera rammei Willemse & Heller, 2001	synonym species	1143029	Eupholidoptera feri	F. Willemse & Heller, 2001	is subjective synonym of	urn:lsid:faunaeur.org:taxname:454471	urn:lsid:faunaeur.org:taxname:403481	exact
Eupholidoptera forcipata Willemse & Kruseman, 1976	species	1143013	Eupholidoptera forcipata	F. Willemse & Kruseman, 1976	accepted	urn:lsid:faunaeur.org:taxname:403466		exact
Eupholidoptera gemellata Willemse & Kruseman, 1976	species	1143003	Eupholidoptera gemellata	F. Willemse & Kruseman, 1976	accepted	urn:lsid:faunaeur.org:taxname:403467		exact
Eupholidoptera giuliae Massa, 1999	species	1143026	Eupholidoptera giuliae	Massa, 1999	accepted	urn:lsid:faunaeur.org:taxname:403468		exact			1264284	urn:lsid:globalnames.org:index:74504a04-2fa4-5e9c-bd87-f96d051e715d
Eupholidoptera hesperica La Greca, 1959	species	1142973	Eupholidoptera hesperica	La Greca, 1959	accepted	urn:lsid:faunaeur.org:taxname:403469		exact			1264254	urn:lsid:globalnames.org:index:a845ed15-3cee-5d7a-b35b-22270c279cd1
Eupholidoptera icariensis Willemse, 1980	species	1143014	Eupholidoptera icariensis	F. Willemse, 1980	accepted	urn:lsid:faunaeur.org:taxname:403470		exact
Eupholidoptera jacquelinae Tilmans, 2002	species	1143006	Eupholidoptera jacquelinae	Tilmans, 2002	accepted	urn:lsid:faunaeur.org:taxname:403471		exact			1264281	urn:lsid:globalnames.org:index:4564d3e1-e964-50a0-a27d-0ff2910f2f31
Eupholidoptera kykladica Çiplak, Heller & Willemse, 2009	species	1143009	Eupholidoptera kykladica	Heller & F.Willemse & L.Willemse, 2009	accepted	urn:lsid:faunaeur.org:taxname:403472		exact
Eupholidoptera latens Willemse & Kruseman, 1976	species	1143033	Eupholidoptera latens	F. Willemse & Kruseman, 1976	accepted	urn:lsid:faunaeur.org:taxname:403473		exact
Eupholidoptera leucasi Willemse, 1980	species	1142974	Eupholidoptera leucasi	F. Willemse, 1980	accepted	urn:lsid:faunaeur.org:taxname:403474		exact
Eupholidoptera mariannae Willemse & Heller, 2001	species	1143027	Eupholidoptera mariannae	F. Willemse & Heller, 2001	accepted	urn:lsid:faunaeur.org:taxname:403475		exact
Eupholidoptera megastyla (Ramme, 1939)	species	1142975	Eupholidoptera megastyla	(Ramme, 1939)	accepted	urn:lsid:faunaeur.org:taxname:403476		exact
Eupholidoptera karatolosi Mofidi-Neyestanak & Quicke, 2007	synonym species	1142976	Eupholidoptera megastyla	Mofidi-Neyestanak & Quicke, 2007	is subjective synonym of	urn:lsid:faunaeur.org:taxname:403477	urn:lsid:faunaeur.org:taxname:403476	exact
Eupholidoptera kinzelbachi Harz, 1981	synonym species	1142978	Eupholidoptera megastyla	Harz, 1981	is subjective synonym of	urn:lsid:faunaeur.org:taxname:403478	urn:lsid:faunaeur.org:taxname:403476	exact
Eupholidoptera pallipes Willemse & Kruseman, 1976	species	1143002	Eupholidoptera pallipes	F. Willemse & Kruseman, 1976	accepted	urn:lsid:faunaeur.org:taxname:403479		exact
Eupholidoptera prasina (Brunner von Wattenwyl, 1882)	species	1143018	Eupholidoptera prasina	(Brunner von Wattenwyl, 1882)	accepted	urn:lsid:faunaeur.org:taxname:403480		exact
Eupholidoptera smyrnensis (Brunner von Wattenwyl, 1882)	species	1142986	Eupholidoptera smyrnensis	(Brunner von Wattenwyl, 1882)	accepted	urn:lsid:faunaeur.org:taxname:403482		exact
Eupholidoptera spinigera (Ramme, 1930)	species	1143020	Eupholidoptera spinigera	(Ramme, 1930)	accepted	urn:lsid:faunaeur.org:taxname:403483		exact
Eupholidoptera uvarovi (Karabag, 1952)	species	1142994	Eupholidoptera uvarovi	(Karabag, 1952)	accepted	urn:lsid:faunaeur.org:taxname:403484		exact
Euryparyphes bolivarii (Stål, 1876)	species	1116732	Euryparyphes bolivari	(Stal, 1876)	accepted	urn:lsid:faunaeur.org:taxname:402798		phonetic	Species name correction
Eunapius stalii Bormans, 1879	species	1116752	Euryparyphes stali	(Bormans, 1879)	accepted	urn:lsid:faunaeur.org:taxname:402799		near	Authorship correction. Genus name correction
Euryparyphes terrulentus (Serville, 1838)	species	1116748	Euryparyphes terrulentus	(Serville, 1839)	accepted	urn:lsid:faunaeur.org:taxname:402800		exact
Euthystira brachyptera brachyptera (Ocskay, 1826)	subspecies	1106450	Euthystira brachyptera	(Ocskay, 1826)	accepted	urn:lsid:faunaeur.org:taxname:402521		unbiased infra rank	As nominal subspecies in OSF
Evergoderes cabrerai Bolívar, 1936	species	1142056	Evergoderes cabrerai	Bolivar, 1936	accepted	urn:lsid:faunaeur.org:taxname:403486		exact			18289672	urn:lsid:globalnames.org:index:8f5097b4-61e2-508d-a69f-629cc89624bd
Exodrymadusa inornata (Uvarov, 1936)	species	1141940	Exodrymadusa inornata	(Uvarov, 1936)	accepted	urn:lsid:faunaeur.org:taxname:403488		exact
Eyprepocnemis plorans plorans (Charpentier, 1825)	subspecies	1113734	Eyprepocnemis plorans	(Charpentier, 1825)	accepted	urn:lsid:faunaeur.org:taxname:402639		unbiased infra rank	As nominal subspecies in OSF
Gampsocleis abbreviata abbreviata Herman, 1874	subspecies	1142851	Gampsocleis abbreviata	Herman, 1874	accepted	urn:lsid:faunaeur.org:taxname:403490		unbiased infra rank	As nominal subspecies in OSF		622007	urn:lsid:globalnames.org:index:5e032419-25cd-5bf8-be26-66077e2f2ab2
Gampsocleis glabra (Herbst, 1786)	species	1142859	Gampsocleis glabra	(Herbst, 1786)	accepted	urn:lsid:faunaeur.org:taxname:403491		exact
Gampsocleis schelkovnikovae Adelung, 1916	species	1142893	Gampsocleis schelkovnikovae	Adelung, 1916	accepted	urn:lsid:faunaeur.org:taxname:403492		exact			18476326	urn:lsid:globalnames.org:index:1ac10506-675d-53b5-9640-cbd37cf1a3af
Gampsocleis sedakovii sedakovii (Fischer von Waldheim, 1846)	subspecies	1142879	Gampsocleis sedakovi	(Fischer de Waldheim, 1846)	accepted	urn:lsid:faunaeur.org:taxname:403493		unbiased infra rank	As nominal subspecies in OSF
Glyphanus obtusus Fieber, 1853	species	1116689	Glyphanus obtusus	Fieber, 1853	accepted	urn:lsid:faunaeur.org:taxname:402832		exact			679689	urn:lsid:globalnames.org:index:b71fcb11-cce0-5751-bd10-bc01dab615ad
Glyphotmethis escherichi escherichi (Krauss, 1896)	subspecies	1117519	Glyphotmethis escherichi	(Krauss, 1896)	accepted	urn:lsid:faunaeur.org:taxname:402835		unbiased infra rank	As nominal subspecies in OSF
Glyphotmethis heldreichi (Brunner von Wattenwyl, 1882)	species	1117523	Glyphotmethis heldreichi	(Brunner von Wattenwyl, 1882)	accepted	urn:lsid:faunaeur.org:taxname:402834		exact
Gomphoceridius brevipennis (Brisout de Barneville, 1848)	species	1106287	Gomphoceridius brevipennis	(Brisout de Barneville, 1858)	accepted	urn:lsid:faunaeur.org:taxname:402519		exact
Gomphocerippus rufus (Linnaeus, 1758)	species	1106254	Gomphocerippus rufus	(Linnaeus, 1758)	accepted	urn:lsid:faunaeur.org:taxname:402517		exact
Gomphocerus sibiricus sibiricus (Linnaeus, 1767)	subspecies	1106150	Gomphocerus sibiricus	(Linnaeus, 1767)	accepted	urn:lsid:faunaeur.org:taxname:402515		unbiased infra rank	As nominal subspecies in OSF
Grylloderes brunneri (Riggio, 1888)	species	1123753	Grylloderes brunneri	(Riggio, 1888)	accepted	urn:lsid:faunaeur.org:taxname:403008		exact
Grylloderes orlovskajae orlovskajae Gorochov, 1988	subspecies	1123762	Grylloderes orlovskajae	Gorochov, 1988	accepted	urn:lsid:faunaeur.org:taxname:403006		unbiased infra rank	As nominal subspecies in OSF		614272	urn:lsid:globalnames.org:index:dac83a54-411a-5035-952b-8b1e46802b5e
Grylloderes orlovskajae adventicius Gorochov & Llorente del Moral, 2001	subspecies	1123763	Grylloderes orlovskajae adventicius	Gorochov & Llorente, 2001	accepted	urn:lsid:faunaeur.org:taxname:403007		near	Authorship correction
Gryllodes sigillatus (Walker, 1869)	species	1123306	Gryllodes sigillatus	(Walker, 1869)	accepted	urn:lsid:faunaeur.org:taxname:403004		exact			5760470	urn:lsid:globalnames.org:index:d74f3300-81fb-5c57-8e05-250df8852a10
Gryllodinus kerkennensis (Finot, 1893)	species	1122754	Gryllodinus kerkennensis	(Finot, 1893)	accepted	urn:lsid:faunaeur.org:taxname:403002		exact
Gryllodinus odicus (Uvarov, 1911)	species	1122758	Gryllodinus odicus	Uvarov, 1911	accepted	urn:lsid:faunaeur.org:taxname:403003		exact
Gryllomorpha (Gryllomorpha) dalmatina cretensis Ramme, 1927	subspecies	1123969	Gryllomorpha (Gryllomorpha) cretensis	Ramme, 1927	accepted	urn:lsid:faunaeur.org:taxname:402960		near	Species name correction
Gryllomorpha (Gryllomorpha) dalmatina dalmatina (Ocskay, 1832)	subspecies	1123877	Gryllomorpha (Gryllomorpha) dalmatina	(Ocskay, 1832)	accepted	urn:lsid:faunaeur.org:taxname:402961		unbiased infra rank	As nominal subspecies in OSF
Gryllomorpha (Gryllomorpha) longicauda longicauda (Rambur, 1838)	subspecies	1123991	Gryllomorpha (Gryllomorpha) longicauda	(Rambur, 1839)	accepted	urn:lsid:faunaeur.org:taxname:402964		unbiased infra rank	As nominal subspecies in OSF
Gryllomorpha (Gryllomorphella) albanica Ebner, 1910	species	1123947	Gryllomorpha (Gryllomorphella) albanica	Ebner, 1910	accepted	urn:lsid:faunaeur.org:taxname:402967		exact
Gryllomorpha (Gryllomorphella) canariensis Chopard, 1939	species	1123948	Gryllomorpha (Gryllomorphella) canariensis	Chopard, 1939	accepted	urn:lsid:faunaeur.org:taxname:402968		exact
Gryllomorpha (Gryllomorphella) miramae miramae Medvedev, 1933	subspecies	1123954	Gryllomorpha (Gryllomorphella) miramae	Medvedev, 1933	accepted	urn:lsid:faunaeur.org:taxname:402969		unbiased infra rank	As nominal subspecies in OSF
Gryllomorpha (Gryllomorphella) uclensis uclensis Pantel, 1890	subspecies	1123964	Gryllomorpha (Gryllomorphella) uclensis	Pantel, 1890	accepted	urn:lsid:faunaeur.org:taxname:402971		unbiased infra rank	As nominal subspecies in OSF
Gryllomorpha (Gryllomorpha) gracilipes Chopard, 1943	species	1123972	Gryllomorpha gracilipes	Chopard, 1943	accepted	urn:lsid:faunaeur.org:taxname:402972		exact			818379	urn:lsid:globalnames.org:index:08e2887d-3600-5a0a-acca-fc4409f24616
Euchorthippus sardous Nadig, 1934	species	1106497	Euchorthippus sardous	Nadig in Nadig & Nadig 1934	accepted	urn:lsid:faunaeur.org:taxname:402531		near	Authorship correction
Gryllopsis caspicus Gorochov, 1986	species	1123327	Gryllopsis caspicus	Gorochov, 1986	accepted	urn:lsid:faunaeur.org:taxname:402999		exact			817794	urn:lsid:globalnames.org:index:8f297de5-602b-5e4a-b73c-c0bebc5002e8
Gryllotalpa africana africana Palisot de Beauvois, 1805	subspecies	1204055	Gryllotalpa africana	Palisot de Beauvois, 1805	accepted	urn:lsid:faunaeur.org:taxname:403027		unbiased infra rank	As nominal subspecies in OSF		16762502	urn:lsid:globalnames.org:index:66ddfecb-65a7-5efb-ac29-f0ce47827924
Gryllotalpa cossyrensis Baccetti & Capra, 1978	species	1128814	Gryllotalpa cossyrensis	Baccetti & Capra, 1979	accepted	urn:lsid:faunaeur.org:taxname:403028		exact
Gryllotalpa gryllotalpa (Linnaeus, 1758)	species	1128791	Gryllotalpa gryllotalpa	(Linnaeus, 1758)	accepted	urn:lsid:faunaeur.org:taxname:403029		exact
Gryllotalpa krimbasi Baccetti, 1992	species	1128828	Gryllotalpa krimbasi	Baccetti, 1992	accepted	urn:lsid:faunaeur.org:taxname:403030		exact			816608	urn:lsid:globalnames.org:index:534cd0fd-0619-5eea-8e37-855aeae7f1aa
Gryllotalpa octodecim Baccetti & Capra, 1978	species	1128837	Gryllotalpa octodecim	Baccetti & Capra, 1979	accepted	urn:lsid:faunaeur.org:taxname:403031		exact
Gryllotalpa quindecim Baccetti & Capra, 1978	species	1128845	Gryllotalpa quindecim	Baccetti & Capra, 1979	accepted	urn:lsid:faunaeur.org:taxname:403032		exact
Gryllotalpa robusta Townsend, 1983	species	1128846	Gryllotalpa robusta	Townsend, 1983	accepted	urn:lsid:faunaeur.org:taxname:403033		exact			16762509	urn:lsid:globalnames.org:index:ce05c12f-b526-549c-8b57-137f1d425d06
Gryllotalpa sedecim Baccetti & Capra, 1978	species	1128848	Gryllotalpa sedecim	Baccetti & Capra, 1979	accepted	urn:lsid:faunaeur.org:taxname:403034		exact
Gryllotalpa septemdecimchromosomica Ortiz, 1958	species	1128798	Gryllotalpa septemdecimchromosomica	Ortiz, 1958	accepted	urn:lsid:faunaeur.org:taxname:403035		exact			816585	urn:lsid:globalnames.org:index:02ad569e-9f4e-5769-a05c-f63a8f19603f
Gryllotalpa 17-chromosomica Ortiz, 1958	synonym species	1128799	Gryllotalpa septemdecimchromosomica	Ortiz, 1958	accepted	urn:lsid:faunaeur.org:taxname:403035	urn:lsid:faunaeur.org:taxname:403035	near	Misspelling species name?		816585	urn:lsid:globalnames.org:index:02ad569e-9f4e-5769-a05c-f63a8f19603f
Gryllotalpa stepposa Zhantiev, 1991	species	1128850	Gryllotalpa stepposa	Zhantiev, 1991	accepted	urn:lsid:faunaeur.org:taxname:403036		exact			816635	urn:lsid:globalnames.org:index:e363262e-e885-5a27-8920-716f8ecf2929
Gryllotalpa unispina Saussure, 1874	species	1128852	Gryllotalpa unispina	Saussure, 1874	accepted	urn:lsid:faunaeur.org:taxname:403037		exact			816636	urn:lsid:globalnames.org:index:5e1c20e8-0422-5159-841b-c8d9c01d0f80
Gryllotalpa viginti Baccetti & Capra, 1978	species	1128854	Gryllotalpa viginti	Baccetti & Capra, 1979	accepted	urn:lsid:faunaeur.org:taxname:403038		exact
Gryllotalpa vigintiunum Baccetti, 1991	species	1128855	Gryllotalpa vigintiunum	Baccetti, 1991	accepted	urn:lsid:faunaeur.org:taxname:403039		exact			816638	urn:lsid:globalnames.org:index:f8c13001-af61-54c4-9931-7561fa2efce5
Gryllotalpa vineae Bennet-Clark, 1970	species	1128856	Gryllotalpa vineae	Bennet-Clark, 1970	accepted	urn:lsid:faunaeur.org:taxname:403040		exact			816639	urn:lsid:globalnames.org:index:b97eedda-5a6e-544a-84ea-0c0422e84c07
Gryllus (Gryllus) bimaculatus De Geer, 1773	species	1122377	Gryllus bimaculatus	De Geer, 1773	accepted	urn:lsid:faunaeur.org:taxname:402996		exact			817219	urn:lsid:globalnames.org:index:b467326e-322d-55d6-983c-12759c3f41f1
Gryllus (Gryllus) campestris Linnaeus, 1758	species	1122466	Gryllus campestris	Linnaeus, 1758	accepted	urn:lsid:faunaeur.org:taxname:402997		exact			817277	urn:lsid:globalnames.org:index:e4acaebc-446a-5c3c-b4de-3e658c503fff
Heteracris annulosa Walker, 1870	species	1113842	Heteracris annulosa	Walker, 1870	accepted	urn:lsid:faunaeur.org:taxname:402636		exact			6722147	urn:lsid:globalnames.org:index:00421e88-aff1-5176-93d1-b834d1a91e9f
Heteracris littoralis (Rambur, 1838)	species	1113848	Heteracris littoralis	(Rambur, 1838)	accepted	urn:lsid:faunaeur.org:taxname:402637		exact
Hyalorrhipis canescens (Saussure, 1888)	species	1103602	Hyalorrhipis canescens	(Saussure, 1888)	accepted	urn:lsid:faunaeur.org:taxname:402389		exact
Hyalorrhipis clausii (Kittary, 1849)	species	1103603	Hyalorrhipis clausi	(Kittary, 1849)	accepted	urn:lsid:faunaeur.org:taxname:402388		phonetic	Misspelling species name
			Hyalorrhipis schochi	(Saussure, 1884)	accepted	urn:lsid:faunaeur.org:taxname:402390		no match	Gap
Hymenoptila lanzarotensis Kevan & Hsiung, 1992	species	1123874	Hymenoptila lanzarotensis	Kevan, 1992	accepted	urn:lsid:faunaeur.org:taxname:402958		exact
Isophya amplipennis Brunner von Wattenwyl, 1878	species	1137827	Isophya amplipennis	Brunner von Wattenwyl, 1878	accepted	urn:lsid:faunaeur.org:taxname:403225		exact			812122	urn:lsid:globalnames.org:index:9fed21f5-dbc2-541f-b1cd-cdc9e43efa72
Isophya andreevae Peshev, 1981	species	1137791	Isophya andreevae	Peshev, 1981	accepted	urn:lsid:faunaeur.org:taxname:403226		exact			812170	urn:lsid:globalnames.org:index:303f4eaf-b279-5a19-801e-e28cd4d1f552
Isophya beybienkoi Maran, 1958	species	1137746	Isophya beybienkoi	Maran, 1958	accepted	urn:lsid:faunaeur.org:taxname:403227		exact			812168	urn:lsid:globalnames.org:index:f0b2f372-0cbb-5a5b-ace6-1c45a82611de
Isophya boldyrevi Miram, 1938	species	1137748	Isophya boldyrevi	Miram, 1938	accepted	urn:lsid:faunaeur.org:taxname:403228		exact			812166	urn:lsid:globalnames.org:index:b46a0dac-3f37-5ef0-b83c-1d691a87b906
Isophya brevicauda Ramme, 1931	species	1137749	Isophya brevicauda	Ramme, 1931	accepted	urn:lsid:faunaeur.org:taxname:403229		exact			812164	urn:lsid:globalnames.org:index:29e3de1c-df85-5f59-9efc-2b8f14ba2ea8
Isophya brunneri Retowski, 1888	species	1137750	Isophya brunneri	Retowski, 1888	accepted	urn:lsid:faunaeur.org:taxname:403230		exact			812163	urn:lsid:globalnames.org:index:9d41e3c2-511e-5a04-8219-8593827660f9
Isophya bureschi Peshev, 1959	species	1137792	Isophya bureschi	Peshev, 1959	accepted	urn:lsid:faunaeur.org:taxname:403231		exact			812162	urn:lsid:globalnames.org:index:397ba3db-823f-541a-85dc-b87b38377a43
Isophya camptoxypha (Fieber, 1853)	species	1137878	Isophya camptoxypha	(Fieber, 1853)	accepted	urn:lsid:faunaeur.org:taxname:403232		exact
Isophya brevipennis Brunner von Wattenwyl, 1878	synonym species	1137879	Isophya camptoxypha	Brunner von Wattenwyl, 1878	is subjective synonym of	urn:lsid:faunaeur.org:taxname:403233	urn:lsid:faunaeur.org:taxname:403232	exact
Isophya ciucasi Iorgu & Iorgu, 2010	species	1137882	Isophya ciucasi	Iorgu, I S & Iorgu, E I, 2010	accepted	urn:lsid:faunaeur.org:taxname:454468		exact
Isophya clara Ingrisch & Pavicevic, 2010	species	1137808	Isophya clara	Ingrisch & Pavicevic, 2010	accepted	urn:lsid:faunaeur.org:taxname:403234		exact
Isophya costata Brunner von Wattenwyl, 1878	species	1137752	Isophya costata	Brunner von Wattenwyl, 1878	accepted	urn:lsid:faunaeur.org:taxname:403235		exact			812161	urn:lsid:globalnames.org:index:4fe4825d-26c1-533d-8d86-aa2049b654b9
Isophya dobrogensis Kis, 1994	species	1137753	Isophya dobrogensis	Kis, 1994	accepted	urn:lsid:faunaeur.org:taxname:403236		exact			812160	urn:lsid:globalnames.org:index:13044ffe-a69e-56ce-bb0f-dd08a6eafa0d
Isophya doneciana Bey-Bienko, 1954	species	1137754	Isophya doneciana	Bey-Bienko, 1954	accepted	urn:lsid:faunaeur.org:taxname:403237		exact
Isophya fatrensis Chládek, 2007	species	1137875	Isophya fatrensis	Chladek, 2007	accepted	urn:lsid:faunaeur.org:taxname:403238		exact
Isophya gulae Peshev, 1981	species	1137755	Isophya gulae	Peshev, 1981	accepted	urn:lsid:faunaeur.org:taxname:403239		exact			812157	urn:lsid:globalnames.org:index:62887274-4bf5-5910-b885-e1f2d63956ad
Isophya harzi Kis, 1960	species	1137756	Isophya harzi	Kis, 1960	accepted	urn:lsid:faunaeur.org:taxname:403240		exact			812156	urn:lsid:globalnames.org:index:41fb8212-9f3d-5c77-965b-0529560e5a5b
Isophya hospodar (Saussure, 1898)	species	1137777	Isophya hospodar	(Saussure, 1898)	accepted	urn:lsid:faunaeur.org:taxname:403241		exact
Isophya kisi Peshev, 1981	synonym species	1137793	Isophya kisi	Peshev, 1981	accepted	urn:lsid:faunaeur.org:taxname:403242		exact			812153	urn:lsid:globalnames.org:index:d02e1fb2-919d-5b1a-9f53-acfcb63c1401
Isophya kraussii kraussii Brunner von Wattenwyl, 1878	subspecies	1203938	Isophya kraussii	Brunner von Wattenwyl, 1878	accepted	urn:lsid:faunaeur.org:taxname:403243		unbiased infra rank	As nominal subspecies in OSF		812152	urn:lsid:globalnames.org:index:441ede7a-2e79-50b9-b6f3-e162205d3713
Isophya lemnotica Werner, 1932	species	1137759	Isophya lemnotica	Werner, 1932	accepted	urn:lsid:faunaeur.org:taxname:403244		exact			18366003	urn:lsid:globalnames.org:index:969a954d-5280-57b7-b3ec-2caa369f28c7
Isophya rhodopensis leonorae Kaltenbach, 1965	subspecies	1137794	Isophya leonorae	Kaltenbach, 1965	accepted	urn:lsid:faunaeur.org:taxname:403245		near	Species name correction		812150	urn:lsid:globalnames.org:index:5cea53ec-9443-59ce-994b-18d8cf641614
Isophya longicaudata longicaudata Ramme, 1951	subspecies	1137810	Isophya longicaudata	Ramme, 1951	accepted	urn:lsid:faunaeur.org:taxname:403246		unbiased infra rank	As nominal subspecies in OSF		618481	urn:lsid:globalnames.org:index:f8e17148-bede-5495-871d-55819d3f74b9
Isophya mavromoustakisi Uvarov, 1936	species	1137787	Isophya mavromoustakisi	Uvarov, 1936	accepted	urn:lsid:faunaeur.org:taxname:403247		exact			812107	urn:lsid:globalnames.org:index:f2cdcb62-296c-5d80-9bcf-205b63bed307
Isophya miksici Peshev, 1985	species	1137795	Isophya miksici	Peshev, 1985	accepted	urn:lsid:faunaeur.org:taxname:403248		exact			812147	urn:lsid:globalnames.org:index:b9e8c3c8-e6b4-5ad6-ade0-8ebba6ae1e79
Isophya modesta modesta (Frivaldszky, 1868)	subspecies	1137798	Isophya modesta	(Frivaldszky, 1867)	accepted	urn:lsid:faunaeur.org:taxname:403249		unbiased infra rank	As nominal subspecies in OSF
Isophya modestior Brunner von Wattenwyl, 1882	species	1137760	Isophya modestior	Brunner von Wattenwyl, 1882	accepted	urn:lsid:faunaeur.org:taxname:403250		exact			812146	urn:lsid:globalnames.org:index:88c1eae5-213b-574e-bac7-8309b6fc4010
Isophya obtusa Brunner von Wattenwyl, 1882	species	1137762	Isophya obtusa	Brunner von Wattenwyl, 1882	accepted	urn:lsid:faunaeur.org:taxname:403251		exact			812144	urn:lsid:globalnames.org:index:d520e756-7b2f-5712-9b20-6e7fe993dbe2
Isophya pavelii Brunner von Wattenwyl, 1878	species	1137860	Isophya pavelii	Brunner von Wattenwyl, 1882	accepted	urn:lsid:faunaeur.org:taxname:403252		exact
Isophya rhodopensis petkovi Peshev, 1959	subspecies	1137800	Isophya petkovi	Peshev, 1959	accepted	urn:lsid:faunaeur.org:taxname:403253		unbiased infra rank	As nominal subspecies in OSF		812143	urn:lsid:globalnames.org:index:773deac9-75ad-5445-909d-c0dc10a6b87c
Isophya pienensis pienensis Maran, 1954	subspecies	1137766	Isophya pienensis	Maran, 1954	accepted	urn:lsid:faunaeur.org:taxname:403254		unbiased infra rank	As nominal subspecies in OSF		812134	urn:lsid:globalnames.org:index:0bbc9a80-f6a9-5e6d-88c2-090530f9c25a
Isophya plevnensis Peshev, 1985	species	1137801	Isophya plevnensis	Peshev, 1985	accepted	urn:lsid:faunaeur.org:taxname:403255		exact			812142	urn:lsid:globalnames.org:index:a04c4abc-2292-5e7b-b880-c6adafe7daa4
Isophya posthumoidalis Bazyluk, 1971	species	1137877	Isophya posthumoidalis	Bazyluk, 1971	accepted	urn:lsid:faunaeur.org:taxname:403256		exact			812141	urn:lsid:globalnames.org:index:660f576d-1c9b-5d0b-a142-476d77eae7ab
Isophya pravdini pravdini Peshev, 1985	synonym species	1137802	Isophya pravdini	Peshev, 1985	accepted	urn:lsid:faunaeur.org:taxname:403257		unbiased infra rank	As nominal subspecies in OSF. Status correction		812140	urn:lsid:globalnames.org:index:bf078411-5454-5175-b895-a7988e88af68
Isophya pyrenaea (Serville, 1838)	species	1137763	Isophya pyrenaea	(Serville, 1839)	accepted	urn:lsid:faunaeur.org:taxname:403258		exact
Isophya rammei Peshev, 1981	synonym species	1137861	Isophya rammei	Peshev, 1981	accepted	urn:lsid:faunaeur.org:taxname:403259		exact			812133	urn:lsid:globalnames.org:index:eded2f20-5f5d-5b96-ad6c-bfd3d0713f59
Isophya rectipennis Brunner von Wattenwyl, 1878	species	1137859	Isophya rectipennis	Brunner von Wattenwyl, 1878	accepted	urn:lsid:faunaeur.org:taxname:403260		exact			812123	urn:lsid:globalnames.org:index:63ad54bd-ef87-5603-8297-2864ae708424
Isophya rhodopensis rhodopensis Ramme, 1951	subspecies	1204033	Isophya rhodopensis	Ramme, 1951	accepted	urn:lsid:faunaeur.org:taxname:403261		unbiased infra rank	As nominal subspecies in OSF		812132	urn:lsid:globalnames.org:index:d6fdc25b-5531-58c4-bbb7-e610c01eeae6
Isophya modesta rossica Bey-Bienko, 1954	subspecies	1137799	Isophya rossica	Bey-Bienko, 1954	accepted	urn:lsid:faunaeur.org:taxname:403262		near	Species name correction
Isophya sicula Orci, Szövényi & Nagy, 2010	species	1137881	Isophya sicula	Orci, Gergely & Barnabás, 2010	accepted	urn:lsid:faunaeur.org:taxname:454467		exact
Isophya speciosa (Frivaldszky, 1868)	species	1137815	Isophya speciosa	(Frivaldszky, 1867)	accepted	urn:lsid:faunaeur.org:taxname:403263		exact
Isophya stepposa Bey-Bienko, 1954	species	1137769	Isophya stepposa	Bey-Bienko, 1954	accepted	urn:lsid:faunaeur.org:taxname:403264		exact
Isophya straubei straubei (Fieber, 1853)	subspecies	1137869	Isophya straubei	(Fieber, 1853)	accepted	urn:lsid:faunaeur.org:taxname:403265		unbiased infra rank	As nominal subspecies in OSF
Isophya stysi Cejchan, 1957	species	1137770	Isophya stysi	Cejchan, 1957	accepted	urn:lsid:faunaeur.org:taxname:403266		exact			16961398	urn:lsid:globalnames.org:index:f26eaccc-45a3-534a-a9ab-e6607481c751
Isophya taurica Brunner von Wattenwyl, 1878	species	1137772	Isophya taurica	Brunner von Wattenwyl, 1878	accepted	urn:lsid:faunaeur.org:taxname:403267		exact			812127	urn:lsid:globalnames.org:index:e8a51e15-6405-54f7-ab60-e0bbb25e6862
Isophya thracica Karabag, 1962	species	1137846	Isophya thracica	Karabag, 1962	accepted	urn:lsid:faunaeur.org:taxname:403268		exact			812110	urn:lsid:globalnames.org:index:5ffc3937-b964-584e-8ec3-1dc6f199d21d
Isophya tosevski Pavicevic, 1983	species	1137806	Isophya tosevski	Pavicevic, 1983	accepted	urn:lsid:faunaeur.org:taxname:403269		exact			812126	urn:lsid:globalnames.org:index:b3ac945b-f886-5dfd-a475-01e1427fe898
Isophya zubowskii Bey-Bienko, 1954	species	1137775	Isophya zubowskii	Bey-Bienko, 1954	accepted	urn:lsid:faunaeur.org:taxname:403270		exact
Italohippus albicornis (La Greca, 1948)	species	1107216	Italohippus albicornis	(La Greca, 1948)	accepted	urn:lsid:faunaeur.org:taxname:402512		exact
Italohippus modestus (Ebner, 1915)	species	1107217	Italohippus modestus	(Ebner, 1915)	accepted	urn:lsid:faunaeur.org:taxname:402513		exact
Italohippus monticola (Ebner, 1915)	species	1107218	Italohippus monticola	(Ebner, 1915)	accepted	urn:lsid:faunaeur.org:taxname:402514		exact
Italopodisma acuminata acuminata (La Greca, 1969)	subspecies	1110891	Italopodisma acuminata	(La Greca, 1969)	accepted	urn:lsid:faunaeur.org:taxname:402718		unbiased infra rank	As nominal subspecies in OSF
Italopodisma baccettii (La Greca, 1969)	species	1110883	Italopodisma baccettii	(La Greca, 1969)	accepted	urn:lsid:faunaeur.org:taxname:402719		exact
Italopodisma costae (Targioni-Tozzetti, 1881)	species	1110884	Italopodisma costae	(Targioni-Tozzetti, 1881)	accepted	urn:lsid:faunaeur.org:taxname:402720		exact
Italopodisma ebneri (La Greca, 1954)	species	1110885	Italopodisma ebneri	(La Greca, 1954)	accepted	urn:lsid:faunaeur.org:taxname:402721		exact
Italopodisma fiscellana (La Greca, 1954)	species	1110886	Italopodisma fiscellana	(La Greca, 1954)	accepted	urn:lsid:faunaeur.org:taxname:402722		exact
Italopodisma lagrecai (Galvagni, 1973)	species	1110887	Italopodisma lagrecai	(Galvagni, 1973)	accepted	urn:lsid:faunaeur.org:taxname:402723		exact
Italopodisma lucianae (Baccetti, 1959)	species	1110888	Italopodisma lucianae	(Baccetti, 1959)	accepted	urn:lsid:faunaeur.org:taxname:402724		exact
Italopodisma samnitica (La Greca, 1954)	species	1110889	Italopodisma samnitica	(La Greca, 1954)	accepted	urn:lsid:faunaeur.org:taxname:402725		exact
Italopodisma trapezoidalis trapezoidalis (La Greca, 1969)	subspecies	1110894	Italopodisma trapezoidalis	(La Greca, 1966)	accepted	urn:lsid:faunaeur.org:taxname:402726		unbiased infra rank	As nominal subspecies in OSF
Sphingonotus (Sphingonotus) imitans Brunner von Wattenwyl, 1882	species	1104738	Jacobsiella imitans	(Brunner von Wattenwyl, 1882)	accepted	urn:lsid:faunaeur.org:taxname:402386		near	Genus name correction. As nominal subspecies in OSF		17396442	urn:lsid:globalnames.org:index:4d15a970-62f3-56a2-897d-902b2ebbd942
Kurtharzia nugatoria (Navás, 1909)	species	1116815	Kurtharzia nugatoria	(Navàs, 1908)	accepted	urn:lsid:faunaeur.org:taxname:402794		exact
Kurtharzia sulcata (Bolívar, 1912)	species	1116816	Kurtharzia sulcata	(Bolivar, 1912)	accepted	urn:lsid:faunaeur.org:taxname:402796		exact
Leptophyes albovittata (Kollar, 1833)	species	1137891	Leptophyes albovittata	(Kollar, 1833)	accepted	urn:lsid:faunaeur.org:taxname:403271		exact
Leptophyes boscii Fieber, 1853	species	1137896	Leptophyes boscii	Fieber, 1853	accepted	urn:lsid:faunaeur.org:taxname:403272		exact			812083	urn:lsid:globalnames.org:index:49e2d825-93a7-5082-9773-78c678ab4b5c
Leptophyes calabra Kleukers, Odé & Fontana, 2010	species	1137914	Leptophyes calabra	Kleukers, Ode & Fontana, 2010	accepted	urn:lsid:faunaeur.org:taxname:403273		exact
Leptophyes discoidalis (Frivaldszky, 1868)	species	1137897	Leptophyes discoidalis	(Frivaldszky, 1867)	accepted	urn:lsid:faunaeur.org:taxname:403274		exact
Leptophyes intermedia Ingrisch & Pavicevic, 2010	species	1137916	Leptophyes intermedia	Ingrisch & Pavicevic, 2010	accepted	urn:lsid:faunaeur.org:taxname:403275		exact
Leptophyes laticauda (Frivaldszky, 1868)	species	1137900	Leptophyes laticauda	(Frivaldszky, 1867)	accepted	urn:lsid:faunaeur.org:taxname:403276		exact
Leptophyes lisae Heller, 1988	species	1137902	Leptophyes lisae	Heller & F.Willemse, 1989	accepted	urn:lsid:faunaeur.org:taxname:403277		exact
Leptophyes punctatissima (Bosc, 1792)	species	1137905	Leptophyes punctatissima	(Bosc, 1792)	accepted	urn:lsid:faunaeur.org:taxname:403278		exact			18717080	urn:lsid:globalnames.org:index:6d4d3a35-0d6b-5fbd-8e6d-588b9b87081a
Leptophyes sicula Kleukers, Odé & Fontana, 2010	species	1137915	Leptophyes sicula	Kleukers, Ode & Fontana, 2010	accepted	urn:lsid:faunaeur.org:taxname:403279		exact
Leptopternis gracilis (Eversmann, 1848)	species	1104641	Leptopternis gracilis	(Eversmann, 1848)	accepted	urn:lsid:faunaeur.org:taxname:402384		exact
Lluciapomaresius anapaulae (Schmidt, 2009)	species	1132551	Lluciapomaresius anapaulae	Schmidt, 2009	accepted	urn:lsid:faunaeur.org:taxname:403127		exact
Lluciapomaresius asturiensis (Bolívar, 1898)	species	1132547	Lluciapomaresius asturiensis	(Bolivar, 1898)	accepted	urn:lsid:faunaeur.org:taxname:403129		exact
Lluciapomaresius eclipticus (Barat, 2004)	species	1132550	Lluciapomaresius eclepticus	(Barat, 2004)	accepted	urn:lsid:faunaeur.org:taxname:403137		phonetic	Species name correction
Lluciapomaresius nobrei (Bolívar, 1898)	species	1132545	Lluciapomaresius nobrei	(Bolivar, 1898)	accepted	urn:lsid:faunaeur.org:taxname:403141		exact
Lluciapomaresius ortegai (Pantel, 1896)	species	1132546	Lluciapomaresius ortegai	(Pantel, 1896)	accepted	urn:lsid:faunaeur.org:taxname:403144		exact
Lluciapomaresius panteli (Navás, 1899)	species	1132548	Lluciapomaresius panteli	(Navàs, 1899)	accepted	urn:lsid:faunaeur.org:taxname:403145		exact
Lluciapomaresius stalii (Bolívar, 1877)	species	1132549	Lluciapomaresius stalii	(Bolivar, 1877)	accepted	urn:lsid:faunaeur.org:taxname:403151		exact
Locusta migratoria migratoria (Linnaeus, 1758)	subspecies	1103075	Locusta migratoria	(Linnaeus, 1758)	accepted	urn:lsid:faunaeur.org:taxname:402382		unbiased infra rank	As nominal subspecies in OSF
Lucasinova nigromarginata (Lucas, 1849)	species	1132576	Lucasia nigromarginata	(Lucas, 1849)	accepted	urn:lsid:faunaeur.org:taxname:403106		near	Genus name correction
Meconema meridionale Costa, 1860	species	1134935	Meconema meridionale	A. Costa, 1860	accepted	urn:lsid:faunaeur.org:taxname:403196		near	Correct authorship
Meconema thalassinum (De Geer, 1773)	species	1134937	Meconema thalassinum	(De Geer, 1773)	accepted	urn:lsid:faunaeur.org:taxname:403197		exact
Gryllus alliaceus Germar, 1825	synonym species	1104002	Mecostethus parapleurus	Germar, 1825	is subjective synonym of	urn:lsid:faunaeur.org:taxname:402379	urn:lsid:faunaeur.org:taxname:402378	exact
Medecticus assimilis (Fieber, 1853)	species	1142750	Medecticus assimilis	(Fieber, 1853)	accepted	urn:lsid:faunaeur.org:taxname:403495		exact
Melanogryllus desertus (Pallas, 1771)	species	1122600	Melanogryllus desertus	(Pallas, 1771)	accepted	urn:lsid:faunaeur.org:taxname:402994		exact
Gryllus tomentosus Eversmann, 1859	synonym species	1122605	Melanogryllus desertus	Eversmann, 1859	is subjective synonym of	urn:lsid:faunaeur.org:taxname:402995	urn:lsid:faunaeur.org:taxname:402994	exact
Melanoplus frigidus frigidus (Boheman, 1846)	subspecies	1110375	Melanoplus frigidus	(Boheman, 1846)	accepted	urn:lsid:faunaeur.org:taxname:402715		unbiased infra rank	As nominal subspecies in OSF
Metaplastes ippolitoi La Greca, 1949	species	1137919	Metaplastes ippolitoi	La Greca, 1948	accepted	urn:lsid:faunaeur.org:taxname:403281		exact			812071	urn:lsid:globalnames.org:index:a7eaf843-7175-5201-a4ca-dc7abf0655bf
Metaplastes oertzeni (Brunner von Wattenwyl, 1891)	species	1137920	Metaplastes oertzeni	(Brunner von Wattenwyl, 1891)	accepted	urn:lsid:faunaeur.org:taxname:403282		exact
Metaplastes ornatus (Ramme, 1931)	species	1137921	Metaplastes ornatus	(Ramme, 1931)	accepted	urn:lsid:faunaeur.org:taxname:403283		exact
Metaplastes pulchripennis (Costa, 1863)	species	1137923	Metaplastes pulchripennis	(Costa, 1863)	accepted	urn:lsid:faunaeur.org:taxname:403284		exact
Metrioptera ambigua Pfau, 1986	species	1142492	Metrioptera ambigua	Pfau, 1986	accepted	urn:lsid:faunaeur.org:taxname:403498		exact			16825399	urn:lsid:globalnames.org:index:196be507-398d-54c0-9a72-41f58713ca8f
Metrioptera brachyptera (Linnaeus, 1761)	species	1142493	Metrioptera brachyptera	(Linnaeus, 1761)	accepted	urn:lsid:faunaeur.org:taxname:403500		exact
Metrioptera buyssoni (Saulcy, 1887)	species	1142498	Metrioptera buyssoni	(Saulcy, 1887)	accepted	urn:lsid:faunaeur.org:taxname:403501		exact
Metrioptera caprai caprai Baccetti, 1956	subspecies	1142501	Metrioptera caprai	Baccetti, 1956	accepted	urn:lsid:faunaeur.org:taxname:403502		unbiased infra rank	As nominal subspecies in OSF		622162	urn:lsid:globalnames.org:index:e5b002e4-2172-5a67-8b6b-0b7e80ca829c
Metrioptera hoermanni (Werner, 1906)	species	1142505	Metrioptera hoermanni	(Werner, 1906)	accepted	urn:lsid:faunaeur.org:taxname:403506		exact
Metrioptera karnyana Uvarov, 1924	species	1142508	Metrioptera karnyana	Uvarov, 1921	accepted	urn:lsid:faunaeur.org:taxname:403507		exact
Metrioptera maritima Olmo-Vidal, 1992	species	1142509	Metrioptera maritima	Olmo-Vidal, 1992	accepted	urn:lsid:faunaeur.org:taxname:403509		exact			1264940	urn:lsid:globalnames.org:index:887f3f3a-e4e8-5551-9193-2e2b110f34a0
Metrioptera prenjica (Burr, 1899)	species	1142511	Metrioptera prenjica	(Burr, 1899)	accepted	urn:lsid:faunaeur.org:taxname:403511		exact
Metrioptera saussuriana (Frey-Gessner, 1872)	species	1142512	Metrioptera saussuriana	(Frey-Gessner, 1872)	accepted	urn:lsid:faunaeur.org:taxname:403513		exact
Metrioptera tsirojanni Harz & Pfau, 1983	species	1142514	Metrioptera tsirojanni	Harz & Pfau, 1983	accepted	urn:lsid:faunaeur.org:taxname:403514		exact
Micropodisma salamandra (Fischer, 1853)	species	1111078	Micropodisma salamandra	(Fischer, 1853)	accepted	urn:lsid:faunaeur.org:taxname:402713		exact
Mioscirtus wagneri wagneri (Eversmann, 1859)	subspecies	1103541	Mioscirtus wagneri	(Kittary, 1859)	accepted	urn:lsid:faunaeur.org:taxname:402381		unbiased infra rank	As nominal subspecies in OSF
Galvagniella albanica (Mishchenko, 1952)	species	1110876	Miramella albanica	Mistshenko, 1952	accepted	urn:lsid:faunaeur.org:taxname:402706		near	Genus name correction		16830974	urn:lsid:globalnames.org:index:fc6d11b2-a204-5712-9a38-74493393074c
Miramella (Kisella) alpina (Kollar, 1833)	species	1110999	Miramella alpina	(Kollar, 1833)	accepted	urn:lsid:faunaeur.org:taxname:402707		near	Subgenus name correction
Miramella (Kisella) carinthiaca (Obenberger, 1926)	species	1110991	Miramella carinthiaca	(Puschnig, 1910)	accepted	urn:lsid:faunaeur.org:taxname:402708		exact
Capraiuscola ebneri ebneri (Galvagni, 1953)	subspecies	1110985	Miramella ebneri	Galvagni, 1953	accepted	urn:lsid:faunaeur.org:taxname:402709		near	Genus name correction. As nominal subspecies in OSF		675682	urn:lsid:globalnames.org:index:47d51501-7810-59ef-98b5-0148f639adc5
Nadigella formosanta formosanta (Fruhstorfer, 1921)	subspecies	1221009	Miramella formosanta	(Fr¸hstorfer, 1921)	accepted	urn:lsid:faunaeur.org:taxname:402710		near	Genus name correction. As nominal subspecies in OSF
Miramella (Kisella) irena (Fruhstorfer, 1921)	species	1110993	Miramella irena	(Frühstorfer, 1921)	accepted	urn:lsid:faunaeur.org:taxname:402711		exact
Miramiola pusilla (Miram, 1927)	species	1142918	Miramiola pusilla	(Miram, 1927)	accepted	urn:lsid:faunaeur.org:taxname:403521		exact
Modestana ebneri ebneri (Ramme, 1926)	subspecies	1142304	Modestana ebneri	(Ramme, 1926)	accepted	urn:lsid:faunaeur.org:taxname:403549		unbiased infra rank	As nominal subspecies in OSF
Bicolorana kraussi (Padewieth, 1900)	species	1142307	Modestana kraussi	(Padewieth, 1900)	accepted	urn:lsid:faunaeur.org:taxname:403550		near	Genus name correction
Modestana modesta (Fieber, 1853)	species	1142308	Modestana modesta	Fieber, 1853	accepted	urn:lsid:faunaeur.org:taxname:403551		exact
Modicogryllus (Modicogryllus) algirius algirius (Saussure, 1877)	subspecies	1123006	Modicogryllus algirius	(Saussure, 1877)	accepted	urn:lsid:faunaeur.org:taxname:402905		near	Subgenus name correction. As nominal subspecies in OSF
Modicogryllus (Modicogryllus) cyprius (Saussure, 1877)	species	1123023	Modicogryllus cyprius	(Saussure, 1877)	accepted	urn:lsid:faunaeur.org:taxname:402906		exact
Modicogryllus (Modicogryllus) frontalis (Fieber, 1844)	species	1123033	Modicogryllus frontalis	(Fieber, 1844)	accepted	urn:lsid:faunaeur.org:taxname:402907		exact
Modicogryllus (Modicogryllus) guanchicus (Krauss, 1892)	species	1123040	Modicogryllus guanchicus	(Krauss, 1892)	accepted	urn:lsid:faunaeur.org:taxname:402908		exact
Modicogryllus (Modicogryllus) truncatus (Tarbinsky, 1940)	species	1123079	Modicogryllus truncatus	(Tarbinsky, 1940)	accepted	urn:lsid:faunaeur.org:taxname:402909		exact
Mogoplistes brunneus Serville, 1838	species	1128542	Mogoplistes brunneus	Serville, 1839	accepted	urn:lsid:faunaeur.org:taxname:403047		exact			17174580	urn:lsid:globalnames.org:index:a50c26fb-038a-59c9-9a93-5ed733a13504
Mogoplistes kinzelbachi Harz, 1976	species	1128547	Mogoplistes kinzelbachi	Harz, 1976	accepted	urn:lsid:faunaeur.org:taxname:403048		exact			17607422	urn:lsid:globalnames.org:index:4ddd6b6b-6e53-52ed-86c3-ecf7a84cd7d3
Montana barretii (Burr, 1912)	species	1142625	Montana barretii	(Burr, 1912)	accepted	urn:lsid:faunaeur.org:taxname:403553		exact
Montana carpetana (Bolívar, 1887)	species	1142626	Montana carpetana	(Bolivar, 1887)	accepted	urn:lsid:faunaeur.org:taxname:403554		exact
Montana eversmanni eversmanni (Kittary, 1849)	subspecies	1142630	Montana eversmanni	(Kittary, 1849)	accepted	urn:lsid:faunaeur.org:taxname:403555		unbiased infra rank	As nominal subspecies in OSF
Montana macedonica (Berland & Chopard, 1922)	species	1142635	Montana macedonica	(Berland & Chopard, 1922)	accepted	urn:lsid:faunaeur.org:taxname:403556		exact
Montana medvedevi (Miram, 1927)	species	1142636	Montana medvedevi	(Miram, 1927)	accepted	urn:lsid:faunaeur.org:taxname:403557		exact
Montana montana montana (Kollar, 1833)	subspecies	1142639	Montana montana	(Kollar, 1833)	accepted	urn:lsid:faunaeur.org:taxname:403558		unbiased infra rank	As nominal subspecies in OSF
Montana striata (Thunberg, 1815)	species	1142643	Montana striata	(Kittary, 1849)	accepted	urn:lsid:faunaeur.org:taxname:403559		exact
Montana stricta (Zeller, 1849)	species	1142651	Montana stricta	(Zeller, 1849)	accepted	urn:lsid:faunaeur.org:taxname:403560		exact
Morphacris fasciata (Thunberg, 1815)	species	1104657	Morphacris fasciata	(Thunberg, 1815)	accepted	urn:lsid:faunaeur.org:taxname:402376		exact
Myrmecophilus (Myrmecophilus) acervorum (Panzer, 1799)	species	1128964	Myrmecophilus acervorum	(Panzer, 1799)	accepted	urn:lsid:faunaeur.org:taxname:403057		exact			21752603	urn:lsid:globalnames.org:index:11cbf466-bf00-5add-a682-06aa947092c5
Myrmecophilus (Myrmecophilus) aequispina Chopard, 1923	species	1129004	Myrmecophilus aequispinus	(Chopard, 1923)	accepted	urn:lsid:faunaeur.org:taxname:403058		near	Species name correction		225628	urn:lsid:globalnames.org:index:ecf884d9-ee14-56d7-9d1f-ea58522f8d03
Myrmecophilus (Myrmecophilus) baronii Baccetti, 1966	species	1128966	Myrmecophilus baronii	Baccetti, 1966	accepted	urn:lsid:faunaeur.org:taxname:403059		exact			816725	urn:lsid:globalnames.org:index:3ee1f66f-41f0-5614-b2e8-414aa4d2f651
Myrmecophilus (Myrmecophilus) hirticaudus Fischer von Waldheim, 1846	species	1128975	Myrmecophilus hirticaudus	(Fischer de Waldheim, 1846)	accepted	urn:lsid:faunaeur.org:taxname:403060		exact
Myrmecophilus (Myrmecophilus) myrmecophilus (Savi, 1819)	species	1128983	Myrmecophilus myrmecophilus	(Savi, 1819)	accepted	urn:lsid:faunaeur.org:taxname:403061		exact
Myrmecophilus (Myrmophilina) ochraceus Fischer, 1853	species	1128951	Myrmecophilus ochraceus	(Fischer, 1853)	accepted	urn:lsid:faunaeur.org:taxname:403062		exact			816714	urn:lsid:globalnames.org:index:845749ed-d864-58bc-a660-4443e1cad8ea
Myrmecophila salomonis Wasmann, 1890	synonym species	1128952	Myrmecophilus salomonis	(Wasmann, 1890)	accepted	urn:lsid:faunaeur.org:taxname:403063		exact
Myrmecophila termitophilus Maran, 1959	synonym species	1128998	Myrmecophilus termitophilus	(Maran, 1959)	accepted	urn:lsid:faunaeur.org:taxname:403064		exact			816744	urn:lsid:globalnames.org:index:6d052cd8-459b-5621-af5f-20fe51c4c01a
Myrmecophila zorae Karaman, 1963	synonym species	1129002	Myrmecophilus zorae	(Karaman, 1963)	accepted	urn:lsid:faunaeur.org:taxname:403065		exact
Myrmeleotettix antennatus (Fieber, 1853)	species	1106185	Myrmeleotettix antennatus	(Fieber, 1853)	accepted	urn:lsid:faunaeur.org:taxname:402508		exact			17309261	urn:lsid:globalnames.org:index:039002bb-fa8c-502e-a670-ba698cedf6be
Myrmeleotettix maculatus maculatus (Thunberg, 1815)	subspecies	1106197	Myrmeleotettix maculatus	(Thunberg, 1815)	accepted	urn:lsid:faunaeur.org:taxname:402509		unbiased infra rank	As nominal subspecies in OSF		17309262	urn:lsid:globalnames.org:index:82af4306-54ef-537a-9ee7-8437f5d3d876
Myrmeleotettix pallidus (Brunner von Wattenwyl, 1882)	species	1106190	Myrmeleotettix pallidus	(Brunner von Wattenwyl, 1882)	accepted	urn:lsid:faunaeur.org:taxname:402510		exact
Natula averni (Costa, 1855)	species	1127226	Natula averni	(Costa, 1855)	accepted	urn:lsid:faunaeur.org:taxname:402920		exact
Natula longipennis (Serville, 1838)	species	1127222	Natula longipennis	(Serville, 1839)	accepted	urn:lsid:faunaeur.org:taxname:402921		exact
Nemobius sylvestris sylvestris (Bosc, 1792)	subspecies	1121678	Nemobius sylvestris	(Bosc, 1792)	accepted	urn:lsid:faunaeur.org:taxname:402930		unbiased infra rank	As nominal subspecies in OSF
Neocallicrania bolivarii (Seoane, 1878)	species	1132509	Neocallicrania bolivarii	(Seoane, 1878)	accepted	urn:lsid:faunaeur.org:taxname:403113		exact
Neocallicrania lusitanica (Aires & Menano, 1916)	species	1132510	Neocallicrania lusitanica	(Aires & Menano, 1916)	accepted	urn:lsid:faunaeur.org:taxname:403114		exact
Neocallicrania miegii (Bolívar, 1873)	species	1132511	Neocallicrania miegii	(Bolivar, 1873)	accepted	urn:lsid:faunaeur.org:taxname:403115		exact
Neocallicrania selligera selligera (Charpentier, 1825)	subspecies	1132514	Neocallicrania selligera	(Charpentier, 1825)	accepted	urn:lsid:faunaeur.org:taxname:403116		unbiased infra rank	As nominal subspecies in OSF
Neocallicrania serrata serrata (Bolívar, 1885)	subspecies	1204102	Neocallicrania serrata	(Bolivar, 1885)	accepted	urn:lsid:faunaeur.org:taxname:403117		unbiased infra rank	As nominal subspecies in OSF
Notostaurus albicornis albicornis (Eversmann, 1848)	subspecies	1105675	Notostaurus albicornis	(Eversmann, 1848)	accepted	urn:lsid:faunaeur.org:taxname:402504		unbiased infra rank	As nominal subspecies in OSF
Notostaurus anatolicus (Krauss, 1896)	species	1105669	Notostaurus anatolicus	(Krauss, 1896)	accepted	urn:lsid:faunaeur.org:taxname:402505		exact
Ochrilidia harterti harterti (Bolívar, 1913)	subspecies	1106885	Ochrilidia harterti	(Bolivar, 1913)	accepted	urn:lsid:faunaeur.org:taxname:402495		unbiased infra rank	As nominal subspecies in OSF
Ochrilidia hebetata (Uvarov, 1926)	species	1106887	Ochrilidia hebetata	(Uvarov, 1926)	accepted	urn:lsid:faunaeur.org:taxname:402496		unbiased infra rank	As nominal subspecies in OSF
Ochrilidia hebetata kazaka Tarbinsky, 1926	subspecies	1106889	Ochrilidia hebetata kazaka	(Tarbinsky, 1926)	accepted	urn:lsid:faunaeur.org:taxname:402497		unbiased infra rank	As nominal subspecies in OSF		6867001	urn:lsid:globalnames.org:index:febeee87-6e4d-554d-a7ff-d0a1f9722def
Ochrilidia nuragica Massa, 1994	species	1106846	Ochrilidia nuragica	Massa, 1994	accepted	urn:lsid:faunaeur.org:taxname:402498		exact			810291	urn:lsid:globalnames.org:index:4a7d0ff4-2c4d-5db3-9919-753ec5bca66b
Ochrilidia pruinosa Brunner von Wattenwyl, 1882	species	1106851	Ochrilidia pruinosa	Brunner von Wattenwyl, 1882	accepted	urn:lsid:faunaeur.org:taxname:402499		exact			810296	urn:lsid:globalnames.org:index:e928d1e8-ad88-5a04-9dcf-57de3fc4c554
Ochrilidia sicula (Salfi, 1931)	species	1106853	Ochrilidia sicula	Salfi, 1931	accepted	urn:lsid:faunaeur.org:taxname:402500		exact
Ochrilidia tibialis (Fieber, 1853)	species	1106854	Ochrilidia tibialis	(Fieber, 1853)	accepted	urn:lsid:faunaeur.org:taxname:402501		exact
Ocneridia nigropunctata (Lucas, 1849)	species	1116825	Ocneridia nigropunctata	(Lucas, 1849)	accepted	urn:lsid:faunaeur.org:taxname:402792		exact
Ocnerodes brunnerii brunnerii (Bolívar, 1876)	subspecies	1116836	Ocnerodes brunneri	(Bolivar, 1876)	accepted	urn:lsid:faunaeur.org:taxname:402787		unbiased infra rank	As nominal subspecies in OSF
Ocnerodes fallaciosus Bolívar, 1912	species	1116833	Ocnerodes fallaciosus	Bolivar, 1912	accepted	urn:lsid:faunaeur.org:taxname:402788		exact			7051363	urn:lsid:globalnames.org:index:2a1c50eb-7985-522e-8487-87cd04591347
Ocnerodes prosternalis Bolívar, 1912	species	1116838	Ocnerodes prosternalis	Bolivar, 1912	accepted	urn:lsid:faunaeur.org:taxname:402789		exact
Ocnerodes soleri Llorente del Moral & Presa, 1983	species	1116834	Ocnerodes soleri	Llorente & Presa, 1983	accepted	urn:lsid:faunaeur.org:taxname:402790		near	Authorship correction
Odontopodisma acuminata Kis, 1962	species	1111084	Odontopodisma acuminata	Kis, 1962	accepted	urn:lsid:faunaeur.org:taxname:402696		exact			934498	urn:lsid:globalnames.org:index:b1b1eee8-63e9-5472-badf-4a12ff7f10d2
Odontopodisma albanica Ramme, 1951	species	1111085	Odontopodisma albanica	Ramme, 1951	accepted	urn:lsid:faunaeur.org:taxname:402697		exact			934508	urn:lsid:globalnames.org:index:95147304-fab7-54b9-8825-c89122dceea2
Odontopodisma carpathica Kis, 1961	species	1111086	Odontopodisma carpathica	Kis, 1962	accepted	urn:lsid:faunaeur.org:taxname:402698		exact
Odontopodisma decipiens decipiens Ramme, 1951	subspecies	1111092	Odontopodisma decipiens	Ramme, 1951	accepted	urn:lsid:faunaeur.org:taxname:402699		unbiased infra rank	As nominal subspecies in OSF		675843	urn:lsid:globalnames.org:index:4c3a1524-1ef9-58ec-9b38-ba50c372cd46
Odontopodisma fallax Ramme, 1951	species	1111087	Odontopodisma fallax	Ramme, 1951	accepted	urn:lsid:faunaeur.org:taxname:402700		exact			934528	urn:lsid:globalnames.org:index:bde31d88-c1de-5346-884d-d71009d9636a
Odontopodisma montana Kis, 1962	species	1111088	Odontopodisma montana	Kis, 1962	accepted	urn:lsid:faunaeur.org:taxname:402701		exact			934536	urn:lsid:globalnames.org:index:a05ca818-42d6-51c4-992b-0babcd340cbc
Odontopodisma rammei Harz, 1973	species	1111089	Odontopodisma rammei	Harz, 1973	accepted	urn:lsid:faunaeur.org:taxname:402702		exact			934545	urn:lsid:globalnames.org:index:2a8f5277-8d7a-586e-8590-c7fe06ab15dd
Odontopodisma rubripes (Ramme, 1931)	species	1111090	Odontopodisma rubripes	(Ramme, 1931)	accepted	urn:lsid:faunaeur.org:taxname:402703		exact
Odontopodisma schmidtii (Fieber, 1853)	species	1111095	Odontopodisma schmidtii	(Fieber, 1853)	accepted	urn:lsid:faunaeur.org:taxname:402704		exact
Odontura (Odontura) stenoxypha arcuata Messina, 1981	subspecies	1139144	Odontura arcuata	Messina, 1981	accepted	urn:lsid:faunaeur.org:taxname:403285		near	Genus & species name correction		811450	urn:lsid:globalnames.org:index:7fc02efe-4c3b-554f-9e44-87a0af8762b0
Odontura (Odonturella) aspericauda Rambur, 1838	species	1139140	Odontura aspericauda	Rambur, 1839	accepted	urn:lsid:faunaeur.org:taxname:403286		exact			811452	urn:lsid:globalnames.org:index:7f2a5a67-301a-5c7f-a408-e26ba96b7808
Odontura (Odontura) borrei Bolívar, 1878	species	1139145	Odontura borrei	Bolivar, 1878	accepted	urn:lsid:faunaeur.org:taxname:403287		exact
Odontura (Odontura) calaritana Costa, 1883	species	1139147	Odontura calaritana	Costa, 1883	accepted	urn:lsid:faunaeur.org:taxname:403288		exact			7150645	urn:lsid:globalnames.org:index:d250ba36-c1ab-5856-8622-1b399b6fe2e0
Odontura festai Baccetti, 1991	synonym species	1139148	Odontura calaritana	Baccetti, 1991	is subjective synonym of	urn:lsid:faunaeur.org:taxname:454474	urn:lsid:faunaeur.org:taxname:403288	exact
Odontura (Odontura) glabricauda (Charpentier, 1825)	species	1139149	Odontura glabricauda	(Charpentier, 1825)	accepted	urn:lsid:faunaeur.org:taxname:403290		exact
Odontura (Odonturella) macphersoni Morales-Agacino, 1943	species	1139139	Odontura macphersoni	Morales Agacino, 1943	accepted	urn:lsid:faunaeur.org:taxname:403291		exact			811443	urn:lsid:globalnames.org:index:ef4ea1e7-8d45-5419-a348-48423efbff97
Oecanthus dulcisonans Gorochov, 1993	species	1128085	Oecanthus dulcisonans	Gorochov, 1993	accepted	urn:lsid:faunaeur.org:taxname:402912		exact			819189	urn:lsid:globalnames.org:index:1ca1e245-142b-575f-8e29-7b2027da6617
Oecanthus pellucens pellucens (Scopoli, 1763)	subspecies	1128103	Oecanthus pellucens	(Scopoli, 1763)	accepted	urn:lsid:faunaeur.org:taxname:402913		unbiased infra rank	As nominal subspecies in OSF		6445298	urn:lsid:globalnames.org:index:6b9a694a-0798-5bb0-ab0d-6507a6017766
Oecanthus turanicus Uvarov, 1912	species	1128081	Oecanthus turanicus	Uvarov, 1912	accepted	urn:lsid:faunaeur.org:taxname:402914		exact			819187	urn:lsid:globalnames.org:index:8c415b43-fd87-56ac-8ef0-c0300237a326
Oedaleus decorus (Germar, 1825)	species	1103222	Oedaleus decorus	(Germar, 1826)	accepted	urn:lsid:faunaeur.org:taxname:402373		exact
Oedaleus senegalensis (Krauss, 1877)	species	1103210	Oedaleus senegalensis	(Krauss, 1877)	accepted	urn:lsid:faunaeur.org:taxname:402374		exact
Oedipoda aurea aurea Uvarov, 1923	subspecies	1103487	Oedipoda aurea	Uvarov, 1923	accepted	urn:lsid:faunaeur.org:taxname:402363		unbiased infra rank	As nominal subspecies in OSF		808875	urn:lsid:globalnames.org:index:310f3564-782a-57e7-ad3b-00653d629698
Oedipoda caerulescens caerulescens (Linnaeus, 1758)	subspecies	1103490	Oedipoda caerulescens	(Linnaeus, 1758)	accepted	urn:lsid:faunaeur.org:taxname:402365		unbiased infra rank	As nominal subspecies in OSF
Oedipoda canariensis Krauss, 1892	species	1103470	Oedipoda canariensis	Krauss, 1892	accepted	urn:lsid:faunaeur.org:taxname:402366		exact			808860	urn:lsid:globalnames.org:index:f9f5383d-e067-5598-80d3-5011ac601ac1
Oedipoda charpentieri Fieber, 1853	species	1103471	Oedipoda charpentieri	Fieber, 1853	accepted	urn:lsid:faunaeur.org:taxname:402367		exact			808862	urn:lsid:globalnames.org:index:3d4d8c1d-4845-5920-9f3b-2d6d85900c2e
Oedipoda coerulea Saussure, 1884	species	1103508	Oedipoda coerulea	Saussure, 1884	accepted	urn:lsid:faunaeur.org:taxname:402364		exact			17328158	urn:lsid:globalnames.org:index:7cedb73e-9a23-5042-9b83-949974729d7b
Oedipoda fuscocincta fuscocincta Lucas, 1849	subspecies	1103503	Oedipoda fuscocincta	Lucas, 1849	accepted	urn:lsid:faunaeur.org:taxname:402368		unbiased infra rank	As nominal subspecies in OSF
Oedipoda germanica germanica (Latreille, 1804)	subspecies	1103510	Oedipoda germanica	(Latreille, 1804)	accepted	urn:lsid:faunaeur.org:taxname:402369		unbiased infra rank	As nominal subspecies in OSF
Oedipoda miniata miniata (Pallas, 1771)	subspecies	1103516	Oedipoda miniata	(Pallas, 1771)	accepted	urn:lsid:faunaeur.org:taxname:402370		unbiased infra rank	As nominal subspecies in OSF		11649524	urn:lsid:globalnames.org:index:b5e82911-0c4d-5258-ac2b-f2a1be6a3493
Oedipoda venusta Fieber, 1853	species	1103485	Oedipoda venusta	Fieber, 1853	accepted	urn:lsid:faunaeur.org:taxname:402371		exact			669325	urn:lsid:globalnames.org:index:840162f7-a629-5d7b-a428-8517d4ae393a
Oedipoda venusta Stål, 1861	synonym species	1104786	Oedipoda venusta	Fieber, 1853	accepted	urn:lsid:faunaeur.org:taxname:402371		near	Authorship correction		669325	urn:lsid:globalnames.org:index:840162f7-a629-5d7b-a428-8517d4ae393a
Omocestus (Dreuxius) antigai (Bolívar, 1897)	species	1107316	Omocestus antigai	(Bolivar, 1897)	accepted	urn:lsid:faunaeur.org:taxname:402472		exact			6688348	urn:lsid:globalnames.org:index:57bba874-1f94-5b0c-bbb5-eaf972fdc56b
Stenobothrus broelemanni Azam, 1906	synonym species	1107317	Omocestus antigai	Azam, 1906	is subjective synonym of	urn:lsid:faunaeur.org:taxname:402473	urn:lsid:faunaeur.org:taxname:402472	exact
Omocestus (Dreuxius) bolivari Chopard, 1939	species	1107320	Omocestus bolivari	Chopard, 1939	accepted	urn:lsid:faunaeur.org:taxname:402475		exact			809313	urn:lsid:globalnames.org:index:2eb0d75a-2c27-54a5-9807-3bd7c777b1fb
Omocestus (Omocestus) defauti Sardet & Braud, 2007	species	1107340	Omocestus defauti	Sardet & Braud, 2007	accepted	urn:lsid:faunaeur.org:taxname:402476		exact
Omocestus (Dreuxius) femoralis Bolívar, 1908	species	1107322	Omocestus femoralis	Bolivar, 1908	accepted	urn:lsid:faunaeur.org:taxname:402477		exact			6688349	urn:lsid:globalnames.org:index:e789138f-9094-531e-8ff9-a0ab86aaab6e
Omocestus (Omocestus) haemorrhoidalis haemorrhoidalis (Charpentier, 1825)	subspecies	1107288	Omocestus haemorrhoidalis	(Charpentier, 1825)	accepted	urn:lsid:faunaeur.org:taxname:402478		near	Subgenus name correction		17309371	urn:lsid:globalnames.org:index:d34cc96d-bc46-5eaf-be62-e13f911ee7b7
Omocestus (Omocestus) lopadusae La Greca, 1973	species	1107256	Omocestus lopadusae	La Greca, 1973	accepted	urn:lsid:faunaeur.org:taxname:402479		exact			809281	urn:lsid:globalnames.org:index:2a7dbf2e-09a0-5147-98f2-7eca67f0663e
Omocestus (Dreuxius) minutissimus (Brullé, 1832)	species	1107326	Omocestus minutissimus	(Bolivar, 1878)	accepted	urn:lsid:faunaeur.org:taxname:402480		exact			6688350	urn:lsid:globalnames.org:index:bbf5660f-1071-5b8f-a662-8c8115e89e9f
Omocestus burri Uvarov, 1936	synonym species	1107327	Omocestus minutissimus	Uvarov, 1936	is subjective synonym of	urn:lsid:faunaeur.org:taxname:402483	urn:lsid:faunaeur.org:taxname:402480	exact
Omocestus knipperi Harz, 1982	synonym species	1107329	Omocestus minutissimus	Harz, 1982	is subjective synonym of	urn:lsid:faunaeur.org:taxname:402481	urn:lsid:faunaeur.org:taxname:402480	exact
Omocestus (Omocestus) minutus (Brullé, 1832)	species	1107260	Omocestus minutus	(Brullé, 1832)	accepted	urn:lsid:faunaeur.org:taxname:402484		exact
Omocestus (Omocestus) panteli (Bolívar, 1887)	species	1107267	Omocestus panteli	(Bolivar, 1887)	accepted	urn:lsid:faunaeur.org:taxname:402485		exact
Omocestus (Omocestus) petraeus (Brisout de Barneville, 1856)	species	1107268	Omocestus petraeus	(Brisout de Barneville, 1856)	accepted	urn:lsid:faunaeur.org:taxname:402486		exact
Omocestus (Omocestus) raymondi (Yersin, 1863)	species	1107272	Omocestus raymondi	(Yersin, 1863)	accepted	urn:lsid:faunaeur.org:taxname:402487		exact
Omocestus (Omocestus) rufipes (Zetterstedt, 1821)	species	1107273	Omocestus rufipes	(Zetterstedt, 1821)	accepted	urn:lsid:faunaeur.org:taxname:402488		exact
Omocestus (Omocestus) simonyi (Krauss, 1892)	species	1107280	Omocestus simonyi	(Krauss, 1892)	accepted	urn:lsid:faunaeur.org:taxname:402489		exact
Omocestus (Dreuxius) uhagonii (Bolívar, 1876)	species	1107330	Omocestus uhagonii	(Bolivar, 1876)	accepted	urn:lsid:faunaeur.org:taxname:402490		exact
Omocestus (Omocestus) uvarovi Zanon, 1926	species	1107283	Omocestus uvarovi	Zanon, 1926	accepted	urn:lsid:faunaeur.org:taxname:402491		exact			809303	urn:lsid:globalnames.org:index:a9ea1e8f-8d95-5f06-8cca-17f5da60adc9
Omocestus (Omocestus) viridulus viridulus (Linnaeus, 1758)	subspecies	1107302	Omocestus viridulus	(Linnaeus, 1758)	accepted	urn:lsid:faunaeur.org:taxname:402492		near	Subgenus name correction		17309264	urn:lsid:globalnames.org:index:5d8f3b76-b868-587a-a3f4-cc5604aa3c04
Onconotus laxmanni (Pallas, 1771)	species	1141785	Onconotus laxmanni	(Pallas, 1771)	accepted	urn:lsid:faunaeur.org:taxname:403380		exact
Onconotus servillei Fischer von Waldheim, 1846	species	1141792	Onconotus servillei	Fischer de Waldheim, 1846	accepted	urn:lsid:faunaeur.org:taxname:403381		exact
Orchamus gracilis (Brunner von Wattenwyl, 1882)	species	1116895	Orchamus gracilis	(Brunner von Wattenwyl, 1882)	accepted	urn:lsid:faunaeur.org:taxname:402781		exact
Orchamus kaltenbachi Massa, 2009	species	1116899	Orchamus kaltenbachi	Massa, 2009	accepted	urn:lsid:faunaeur.org:taxname:402782		exact
Orchamus raulinii (Lucas, 1854)	species	1116897	Orchamus raulinii	(Lucas, 1854)	accepted	urn:lsid:faunaeur.org:taxname:402784		exact
Orchamus yersini (Brunner von Wattenwyl, 1882)	species	1116898	Orchamus yersini	(Brunner von Wattenwyl, 1882)	accepted	urn:lsid:faunaeur.org:taxname:402785		exact			807901	urn:lsid:globalnames.org:index:f3bf9c98-d8e0-5da3-a12c-4ee42c7cab30
Oropodisma chelmosi Uvarov, 1942	species	1110898	Oropodisma chelmosi	Uvarov, 1942	accepted	urn:lsid:faunaeur.org:taxname:402685		exact			933664	urn:lsid:globalnames.org:index:4b3593a1-3b2f-5355-a639-2d8fb1b26c5b
Oropodisma erymanthosi Willemse, 1971	species	1110899	Oropodisma erymanthosi	Willemse, 1971	accepted	urn:lsid:faunaeur.org:taxname:402686		exact
Oropodisma karavica La Greca & Messina, 1977	species	1110900	Oropodisma karavica	La Greca & Messina, 1976	accepted	urn:lsid:faunaeur.org:taxname:402687		exact
Oropodisma kyllinii Willemse, 1971	species	1110901	Oropodisma kyllinii	Willemse, 1971	accepted	urn:lsid:faunaeur.org:taxname:402688		exact
Oropodisma lagrecai Willemse, 1979	species	1110902	Oropodisma lagrecai	Willemse, 1979	accepted	urn:lsid:faunaeur.org:taxname:402689		exact			19192170	urn:lsid:globalnames.org:index:24f918c1-015e-5bb2-b7c6-8d26ae55f9fb
Oropodisma macedonica Ramme, 1951	species	1110903	Oropodisma macedonica	Ramme, 1951	accepted	urn:lsid:faunaeur.org:taxname:402690		exact			933905	urn:lsid:globalnames.org:index:d30c20b9-2a06-509d-8c98-9dffcdbd20bc
Oropodisma parnassica (Scudder, 1897)	species	1110904	Oropodisma parnassica	(Scudder, 1897)	accepted	urn:lsid:faunaeur.org:taxname:402691		exact
Oropodisma taygetosi Willemse, 1972	species	1110905	Oropodisma taygetosi	Willemse, 1972	accepted	urn:lsid:faunaeur.org:taxname:402692		exact			17614033	urn:lsid:globalnames.org:index:37569a92-7e38-5c06-b6af-90ceafb38e41
Oropodisma tymphrestosi Willemse, 1972	species	1110906	Oropodisma tymphrestosi	Willemse, 1972	accepted	urn:lsid:faunaeur.org:taxname:402693		exact			17614034	urn:lsid:globalnames.org:index:ad0a821e-771e-52d3-9046-90f5f4a685e1
Oropodisma willemsei La Greca & Messina, 1977	species	1110907	Oropodisma willemsei	La Greca & Messina, 1976	accepted	urn:lsid:faunaeur.org:taxname:402694		exact
Ovaliptila buresi (Maran, 1958)	species	1123900	Ovaloptila buresi	(Maran, 1958)	accepted	urn:lsid:faunaeur.org:taxname:402949		near	Misspelling genus name
Ovaliptila kinzelbachi (Harz, 1971)	species	1123903	Ovaloptila kinzelbachi	(Harz, 1971)	accepted	urn:lsid:faunaeur.org:taxname:402950		near	Misspelling genus name
Ovaliptila krueperi (Pantel, 1890)	species	1123904	Ovaloptila krueperi	(Pantel, 1890)	accepted	urn:lsid:faunaeur.org:taxname:402952		near	Misspelling genus name
Ovaliptila lindbergi (Chopard, 1957)	species	1123906	Ovaloptila lindbergi	(Chopard, 1957)	accepted	urn:lsid:faunaeur.org:taxname:402953		near	Misspelling genus name
Ovaliptila newmanae (Harz, 1969)	species	1123909	Ovaloptila newmanae	(Harz, 1969)	accepted	urn:lsid:faunaeur.org:taxname:402954		near	Misspelling genus name
Ovaliptila wettsteini (Werner, 1934)	species	1123902	Ovaloptila wettsteini	(Werner, 1934)	accepted	urn:lsid:faunaeur.org:taxname:402955		near	Misspelling genus name
Ovaliptila willemsei (Karaman, 1975)	species	1123915	Ovaloptila willemsei	(Karaman, 1975)	accepted	urn:lsid:faunaeur.org:taxname:402956		near	Misspelling genus name
Pachytrachis bosniacus Messina, 1979	species	1142276	Pachytrachis bosniacus	Messina, 1978	accepted	urn:lsid:faunaeur.org:taxname:403523		exact
Pachytrachis frater (Brunner von Wattenwyl, 1882)	species	1142277	Pachytrachis frater	(Brunner von Wattenwyl, 1882)	accepted	urn:lsid:faunaeur.org:taxname:403524		exact
Pachytrachis gracilis (Brunner von Wattenwyl, 1861)	species	1142278	Pachytrachis gracilis	(Brunner von Wattenwyl, 1861)	accepted	urn:lsid:faunaeur.org:taxname:403525		exact
Pachytrachis striolatus (Fieber, 1853)	species	1142279	Pachytrachis striolatus	(Fieber, 1853)	accepted	urn:lsid:faunaeur.org:taxname:403526		exact
Pachytrachis tumidus Ingrisch & Pavicevic, 2010	species	1142275	Pachytrachis tumidus	Ingrisch & Pavicevic, 2010	accepted	urn:lsid:faunaeur.org:taxname:403527		exact
Arcyptera elegans Uvarov, 1910	synonym species	1107452	Pallasiella bolivari	(Kuthy, 1907)	accepted	urn:lsid:faunaeur.org:taxname:402469		no match	Check for correctness
Ramburiella (Palaeocesa) turcomana (Fischer von Waldheim, 1833)	species	1107454	Pallasiella turcomana	(Fischer de Waldheim, 1833)	accepted	urn:lsid:faunaeur.org:taxname:402470		near	Genus name correction
Pamphagus marmoratus Burmeister, 1838	species	1116866	Pamphagus marmoratus	Burmeister, 1838	accepted	urn:lsid:faunaeur.org:taxname:402777		exact			683355	urn:lsid:globalnames.org:index:66011136-8ebb-5635-ba80-59703a2599ca
Pamphagus ortolanii Cusimano & Massa, 1977	species	1116860	Pamphagus ortolaniae	Cusimano & Massa, 1977	accepted	urn:lsid:faunaeur.org:taxname:402778		phonetic	Misspelling species name
Pamphagus sardeus (Herrich-Schäffer, 1840)	species	1116861	Pamphagus sardeus	Herrich-Schäffer, 1840	accepted	urn:lsid:faunaeur.org:taxname:402779		exact
Paracaloptenus bolivari Uvarov, 1942	species	1112869	Paracaloptenus bolivari	Uvarov, 1942	accepted	urn:lsid:faunaeur.org:taxname:402745		exact			1265446	urn:lsid:globalnames.org:index:6bc6e43f-1c1d-54c7-9950-cd2d0752cb5a
Paracaloptenus caloptenoides caloptenoides (Brunner von Wattenwyl, 1861)	subspecies	1112872	Paracaloptenus caloptenoides	(Brunner von Wattenwyl, 1861)	accepted	urn:lsid:faunaeur.org:taxname:402746		unbiased infra rank	As nominal subspecies in OSF
Paracaloptenus cristatus Willemse, 1973	species	1112870	Paracaloptenus cristatus	Willemse, 1973	accepted	urn:lsid:faunaeur.org:taxname:402747		exact			17521736	urn:lsid:globalnames.org:index:706805e0-c574-5f53-b8e7-0414168388ae
Paracinema tricolor tricolor (Thunberg, 1815)		1103367	Paracinema tricolor	(Thunberg, 1815)	accepted	urn:lsid:faunaeur.org:taxname:402362		unbiased infra rank	As nominal subspecies in OSF
Paradrymadusa galitzini Retowski, 1888	species	1141966	Paradrymadusa galitzini	Retowski, 1888	accepted	urn:lsid:faunaeur.org:taxname:403528		exact			1264726	urn:lsid:globalnames.org:index:f7b0e0f4-00bf-509b-bd95-31e6dd4439ce
Paramogoplistes dentatus Gorochov & Llorente del Moral, 2001	species	1128348	Paramogoplistes dentatus	Gorochov & Llorente, 2001	accepted	urn:lsid:faunaeur.org:taxname:403050		near	Correct authorship
Paramogoplistes novaki (Krauss, 1888)	species	1128346	Paramogoplistes novaki	(Krauss, 1888)	accepted	urn:lsid:faunaeur.org:taxname:403051		exact
Paranocaracris bulgaricus (Ebner & Drenowski, 1936)	species	1117026	Paranocaracris bulgaricus	(Ebner & Drenowski, 1930)	accepted	urn:lsid:faunaeur.org:taxname:402776		exact
Paranocarodes chopardi Peshev, 1965	species	1117084	Paranocarodes chopardi	Peshev, 1965	accepted	urn:lsid:faunaeur.org:taxname:402771		exact
Paranocarodes fieberi fieberi (Brunner von Wattenwyl, 1882)	subspecies	1117070	Paranocarodes fieberi	(Brunner von Wattenwyl, 1882)	accepted	urn:lsid:faunaeur.org:taxname:402772		unbiased infra rank	As nominal subspecies in OSF
Paranocarodes straubei straubei (Fieber, 1853)	subspecies	1117075	Paranocarodes straubei	(Fieber, 1853)	accepted	urn:lsid:faunaeur.org:taxname:402774		unbiased infra rank	As nominal subspecies in OSF
Parapholidoptera castaneoviridis (Brunner von Wattenwyl, 1882)	species	1143052	Parapholidoptera castaneoviridis	(Brunner von Wattenwyl, 1882)	accepted	urn:lsid:faunaeur.org:taxname:403530		unbiased infra rank	As nominal subspecies in OSF
Parapholidoptera noxia (Ramme, 1930)	species	1143058	Parapholidoptera noxia	(Ramme, 1930)	accepted	urn:lsid:faunaeur.org:taxname:403531		exact
Parapholidoptera signata (Brunner von Wattenwyl, 1861)	species	1143056	Parapholidoptera signata	(Brunner von Wattenwyl, 1861)	accepted	urn:lsid:faunaeur.org:taxname:403532		exact
Parasteropleurus balearicus (Bolívar, 1884)	species	1132554	Parasteropleurus balearicus	(Bolivar, 1884)	accepted	urn:lsid:faunaeur.org:taxname:403130		exact
Parasteropleurus martorellii martorellii (Bolívar, 1878)	subspecies	1132560	Parasteropleurus martorellii	(Bolivar, 1878)	accepted	urn:lsid:faunaeur.org:taxname:403140		unbiased infra rank	As nominal subspecies in OSF
Parasteropleurus perezii (Bolívar, 1877)	species	1132564	Parasteropleurus perezii	(Bolivar, 1877)	accepted	urn:lsid:faunaeur.org:taxname:403146		exact
Paratettix meridionalis (Rambur, 1838)	species	1102406	Paratettix meridionalis	(Rambur, 1838)	accepted	urn:lsid:faunaeur.org:taxname:402275		exact
Parnassiana chelmos chelmos (Zeuner, 1941)	subspecies	1142656	Parnassiana chelmos	Zeuner, 1941	accepted	urn:lsid:faunaeur.org:taxname:403562		unbiased infra rank	As nominal subspecies in OSF
Parnassiana coracis (Ramme, 1921)	species	1142659	Parnassiana coracis	(Ramme, 1920)	accepted	urn:lsid:faunaeur.org:taxname:403563		exact
Parnassiana dirphys (Willemse, 1980)	species	1142660	Parnassiana dirphys	F. Willemse, 1980	accepted	urn:lsid:faunaeur.org:taxname:403564		exact
Parnassiana fusca (Brunner von Wattenwyl, 1882)	species	1142661	Parnassiana fusca	Brunner von Wattenwyl, 1882	accepted	urn:lsid:faunaeur.org:taxname:403565		exact
Parnassiana gionica La Greca & Messina, 1976	species	1142662	Parnassiana gionica	La Greca & Messina, 1976	accepted	urn:lsid:faunaeur.org:taxname:403566		exact
Parnassiana menalon Willemse, 1975	species	1142663	Parnassiana menalon	F. Willemse, 1975	accepted	urn:lsid:faunaeur.org:taxname:403567		exact
Parnassiana nigromarginata (Willemse & Willemse, 1987)	species	1142664	Parnassiana nigromarginata	(L. & F. Willemse, 1987)	accepted	urn:lsid:faunaeur.org:taxname:403568		exact
Parnassiana panaetolikon Willemse, 1980	species	1142665	Parnassiana panaetolikon	F. Willemse, 1980	accepted	urn:lsid:faunaeur.org:taxname:403569		exact
Parnassiana parnassica (Ramme, 1926)	species	1142666	Parnassiana parnassica	(Ramme, 1926)	accepted	urn:lsid:faunaeur.org:taxname:403570		exact
Parnassiana parnon Willemse, 1980	species	1142667	Parnassiana parnon	F. Willemse, 1980	accepted	urn:lsid:faunaeur.org:taxname:403571		exact
Parnassiana tenuis (Heller & Willemse, 1989)	species	1142668	Parnassiana tenuis	(Heller & F.Willemse, 1989)	accepted	urn:lsid:faunaeur.org:taxname:403572		exact
Parnassiana tymphiensis (Willemse, 1973)	species	1142669	Parnassiana tymphiensis	F. Willemse, 1973	accepted	urn:lsid:faunaeur.org:taxname:403573		exact
Parnassiana tymphrestos Zeuner, 1941	species	1142670	Parnassiana tymphrestos	Zeuner, 1941	accepted	urn:lsid:faunaeur.org:taxname:403574		exact			622371	urn:lsid:globalnames.org:index:abc24715-e9e9-5d32-87f8-a9b817378c56
Peripodisma tymphii Willemse, 1972	species	1111158	Peripodisma tymphii	Willemse, 1972	accepted	urn:lsid:faunaeur.org:taxname:402683		exact
Petaloptila (Petaloptila) aliena (Brunner von Wattenwyl, 1882)	species	1123891	Petaloptila aliena	(Brunner von Wattenwyl, 1882)	accepted	urn:lsid:faunaeur.org:taxname:402933		exact
Discoptila eitschbergeri Harz, 1976	synonym species	1123892	Petaloptila aliena	Harz, 1976	is subjective synonym of	urn:lsid:faunaeur.org:taxname:402935	urn:lsid:faunaeur.org:taxname:402933	exact
Petaloptila (Italoptila) andreinii Capra, 1937	species	1123889	Petaloptila andreinii	Capra, 1935	accepted	urn:lsid:faunaeur.org:taxname:402936		exact			818449	urn:lsid:globalnames.org:index:e4b74f5e-d669-5f73-b4cd-f3d45c26b636
Petaloptila (Zapetaloptila) baenai Barranco, 2004	species	1123884	Petaloptila baenai	Barranco, 2004	accepted	urn:lsid:faunaeur.org:taxname:402937		exact			818446	urn:lsid:globalnames.org:index:9ca83285-e654-5365-b41f-bad1d05a88c2
Petaloptila (Zapetaloptila) barrancoi Gorochov & Llorente del Moral, 2001	species	1123882	Petaloptila barrancoi	Gorochov & Llorente, 2001	accepted	urn:lsid:faunaeur.org:taxname:402938		near	Genus name correction
Petaloptila (Zapetaloptila) bolivari (Cazurro y Ruiz, 1888)	species	1123880	Petaloptila bolivari	(Cazurro, 1888)	accepted	urn:lsid:faunaeur.org:taxname:402939		exact
Petaloptila (Zapetaloptila) carabajali Barranco, 2004	species	1123885	Petaloptila carabajali	Barranco, 2004	accepted	urn:lsid:faunaeur.org:taxname:402940		exact			818447	urn:lsid:globalnames.org:index:a9ea1575-4ce2-5685-a271-98948aa944ac
Petaloptila (Petaloptila) fermini Gorochov & Llorente del Moral, 2001	species	1123895	Petaloptila fermini	Gorochov & Llorente, 2001	accepted	urn:lsid:faunaeur.org:taxname:402941		near	Genus name correction
Petaloptila (Petaloptila) isabelae Gorochov & Llorente del Moral, 2001	species	1123896	Petaloptila isabelae	Gorochov & Llorente, 2001	accepted	urn:lsid:faunaeur.org:taxname:402942		near	Genus name correction
Petaloptila (Zapetaloptila) llorenteae Barranco, 2004	species	1123886	Petaloptila llorenteae	Barranco, 2004	accepted	urn:lsid:faunaeur.org:taxname:402943		exact			818448	urn:lsid:globalnames.org:index:ac0e0c75-4e85-58b4-98f5-563e78ed897b
Petaloptila (Zapetaloptila) malacitana Barranco, 2010	species	1123887	Petaloptila malacitana	Barranco, 2010	accepted	urn:lsid:faunaeur.org:taxname:454469		exact
Petaloptila (Zapetaloptila) mogon Barranco, 2004	species	1123883	Petaloptila mogon	Barranco, 2004	accepted	urn:lsid:faunaeur.org:taxname:402944		exact			818444	urn:lsid:globalnames.org:index:4d9aa4dc-4105-5079-9bee-bc88bce08b8b
Petaloptila (Petaloptila) pallescens Bolívar, 1927	species	1123893	Petaloptila pallescens	Bolivar, 1927	accepted	urn:lsid:faunaeur.org:taxname:402945		exact
Petaloptila (Petaloptila) pyrenaea Olmo-Vidal & Hernando, 2000	species	1123894	Petaloptila pyrenaea	Olmo-Vidal & Hernando, 2000	accepted	urn:lsid:faunaeur.org:taxname:402946		exact
Petaloptila (Zapetaloptila) venosa Gorochov & Llorente del Moral, 2001	species	1123881	Petaloptila venosa	Gorochov & Llorente, 2001	accepted	urn:lsid:faunaeur.org:taxname:402947		near	Genus name correction
Pezotettix anatolica Uvarov, 1934	species	1107499	Pezotettix anatolica	Uvarov, 1934	accepted	urn:lsid:faunaeur.org:taxname:402678		exact			810647	urn:lsid:globalnames.org:index:84a94299-dbad-58de-bccd-2e293da250b9
Pezotettix cypria Dirsh, 1949	species	1107503	Pezotettix cypria	Dirsh, 1949	accepted	urn:lsid:faunaeur.org:taxname:402679		exact			810650	urn:lsid:globalnames.org:index:1c86c3f4-0cb6-5122-9433-67edfdbce220
Pezotettix giornae (Rossi, 1794)	species	1107494	Pezotettix giornae	(Rossi, 1794)	accepted	urn:lsid:faunaeur.org:taxname:402680		exact
Pezotettix giornai Jacobson, 1905	synonym species	1107496	Pezotettix giornae	(Rossi, 1794)	accepted	urn:lsid:faunaeur.org:taxname:402680	urn:lsid:faunaeur.org:taxname:402680	near	Authorship correction
Pezotettix lagoi Jannone, 1936	species	1107505	Pezotettix lagoi	Jannone, 1936	accepted	urn:lsid:faunaeur.org:taxname:402681		exact			810652	urn:lsid:globalnames.org:index:8f050765-a65b-5280-9268-b81df1e77a4a
Phaneroptera (Phaneroptera) falcata (Poda, 1761)	species	1139354	Phaneroptera falcata	(Poda, 1761)	accepted	urn:lsid:faunaeur.org:taxname:403293		exact
Phaneroptera (Phaneroptera) gracilis Burmeister, 1838	species	1139362	Phaneroptera gracilis	Burmeister, 1838	accepted	urn:lsid:faunaeur.org:taxname:403294		exact			811347	urn:lsid:globalnames.org:index:6c3a7de3-8083-5537-922a-78a1380ce639
Phaneroptera (Phaneroptera) nana Fieber, 1853	species	1139373	Phaneroptera nana	Fieber, 1853	accepted	urn:lsid:faunaeur.org:taxname:403295		exact			811341	urn:lsid:globalnames.org:index:cbe3a21c-eece-5a13-b371-3774e12c7957
Phaneroptera (Phaneroptera) sparsa Stål, 1857	species	1139346	Phaneroptera sparsa	Stal, 1857	accepted	urn:lsid:faunaeur.org:taxname:403296		exact			811332	urn:lsid:globalnames.org:index:94ebaf05-b5d2-530e-a698-ce0ccaff017f
Phlugiola dahlemica Eichler, 1938	species	1135588	Phlugiola dahlemica	Eichler, 1938	accepted	urn:lsid:faunaeur.org:taxname:403199		exact			815981	urn:lsid:globalnames.org:index:08597e9d-1353-522a-92ce-a2ebd80eacd3
Phlugiolopsis henryi Zeuner, 1940	species	1134989	Phlugiolopsis henryi	Zeuner, 1940	accepted	urn:lsid:faunaeur.org:taxname:403201		exact			1012020	urn:lsid:globalnames.org:index:e2998789-bf4d-54f8-b92a-d30b2e23256c
Pholidoptera ganevi Harz, 1986	synonym species	1143083	Pholidoptera aptera	Harz, 1986	is subjective synonym of	urn:lsid:faunaeur.org:taxname:454513	urn:lsid:faunaeur.org:taxname:403533	exact
Pholidoptera brevipes Ramme, 1939	species	1143090	Pholidoptera brevipes	Ramme, 1939	accepted	urn:lsid:faunaeur.org:taxname:403534		exact			1264363	urn:lsid:globalnames.org:index:6072dfec-fcf3-5465-b1e2-3ee424d8b91c
Pholidoptera dalmatina Maran, 1953	species	1143123	Pholidoptera dalmatica	(Krauss, 1899)	accepted	urn:lsid:faunaeur.org:taxname:403535		near	Authorship correction
Pholidoptera ebneri Ramme, 1931	species	1143101	Pholidoptera ebneri	Ramme, 1931	accepted	urn:lsid:faunaeur.org:taxname:403536		exact			1264381	urn:lsid:globalnames.org:index:f7b46187-f1a6-523c-b6fb-d2f949a781db
Pholidoptera fallax (Fischer, 1853)	species	1143091	Pholidoptera fallax	(Fischer, 1853)	accepted	urn:lsid:faunaeur.org:taxname:403537		exact
Pholidoptera femorata (Fieber, 1853)	species	1143120	Pholidoptera femorata	(Fieber, 1853)	accepted	urn:lsid:faunaeur.org:taxname:403538		exact
Pholidoptera frivaldszkyi (Herman, 1871)	species	1143102	Pholidoptera frivaldskyi	(Herman, 1871)	accepted	urn:lsid:faunaeur.org:taxname:403539		phonetic	Misspelling species name
Pholidoptera griseoaptera (De Geer, 1773)	species	1143093	Pholidoptera griseoaptera	(De Geer, 1773)	accepted	urn:lsid:faunaeur.org:taxname:403541		exact
Pholidoptera littoralis littoralis (Fieber, 1853)	subspecies	1143106	Pholidoptera littoralis	(Fieber, 1853)	accepted	urn:lsid:faunaeur.org:taxname:403542		unbiased infra rank	As nominal subspecies in OSF
Pholidoptera lucasi Willemse, 1976	species	1143107	Pholidoptera lucasi	F. Willemse, 1976	accepted	urn:lsid:faunaeur.org:taxname:403543		exact
Pholidoptera macedonica macedonica Ramme, 1928	subspecies	1143110	Pholidoptera macedonica	Ramme, 1928	accepted	urn:lsid:faunaeur.org:taxname:403544		unbiased infra rank	As nominal subspecies in OSF		622412	urn:lsid:globalnames.org:index:1aa3d945-9de3-520b-bba9-c4bd6715deb7
Pholidoptera pustulipes pustulipes (Motschulsky, 1846)	subspecies	1221499	Pholidoptera pustulipes	(Fischer de Waldheim, 1846)	accepted	urn:lsid:faunaeur.org:taxname:403545		unbiased infra rank	As nominal subspecies in OSF
Pholidoptera rhodopensis Maran, 1953	species	1143086	Pholidoptera rhodopensis	Maran, 1952	accepted	urn:lsid:faunaeur.org:taxname:454512		exact
Pholidoptera stankoi Karaman, 1960	species	1143117	Pholidoptera stankoi	Karaman, 1960	accepted	urn:lsid:faunaeur.org:taxname:403546		exact
Pholidoptera transsylvanica (Fischer, 1853)	species	1143119	Pholidoptera transsylvanica	(Fischer, 1853)	accepted	urn:lsid:faunaeur.org:taxname:403547		exact
Platycleis affinis affinis Fieber, 1853	species	1142531	Platycleis affinis	Fieber, 1853	accepted	urn:lsid:faunaeur.org:taxname:403577		unbiased infra rank	As nominal subspecies in OSF		622173	urn:lsid:globalnames.org:index:624b3230-17ee-5ded-8848-e5d344013d43
Platycleis albopunctata albopunctata (Goeze, 1778)	subspecies	1142540	Platycleis albopunctata	(Goeze, 1778)	accepted	urn:lsid:faunaeur.org:taxname:403578		unbiased infra rank	As nominal subspecies in OSF
Platycleis concii Galvagni, 1959	species	1142556	Platycleis concii	Galvagni, 1959	accepted	urn:lsid:faunaeur.org:taxname:403579		exact			1264437	urn:lsid:globalnames.org:index:9cb64249-0ecc-568a-b5ae-181a16c64fd3
Platycleis escalerai escalerai Bolívar, 1899	subspecies	1142535	Platycleis escalerai	Bolivar, 1899	accepted	urn:lsid:faunaeur.org:taxname:403580		unbiased infra rank	As nominal subspecies in OSF		6536092	urn:lsid:globalnames.org:index:4c885437-8269-5171-838e-e82e9d7bd5f5
Platycleis falx falx (Fabricius, 1775)	subspecies	1142561	Platycleis falx	(Fabricius, 1775)	accepted	urn:lsid:faunaeur.org:taxname:403581		unbiased infra rank	As nominal subspecies in OSF
Platycleis iberica Zeuner, 1941	species	1142566	Platycleis iberica	Zeuner, 1941	accepted	urn:lsid:faunaeur.org:taxname:403582		exact			1264451	urn:lsid:globalnames.org:index:8241d4dd-477e-5210-9cf9-f136fab7353e
Platycleis intermedia intermedia (Serville, 1838)	subspecies	1142524	Platycleis intermedia	(Serville, 1839)	accepted	urn:lsid:faunaeur.org:taxname:403583		unbiased infra rank	As nominal subspecies in OSF
Platycleis ragusai Ramme, 1927	species	1142577	Platycleis ragusai	Ramme, 1927	accepted	urn:lsid:faunaeur.org:taxname:403584		exact			1264457	urn:lsid:globalnames.org:index:5766cbd2-8362-53a2-b584-a4ba671a9d43
Sphingonotus (Sphingonotus) balteatus roseus Uvarov, 1923	subspecies	1103809	Platycleis romana	Ramme, 1927	accepted	urn:lsid:faunaeur.org:taxname:403585		exact			1264459	urn:lsid:globalnames.org:index:dc564810-e79c-582d-b80c-8188a2e230c0
Platycleis sabulosa Azam, 1901	species	1142579	Platycleis sabulosa	Azam, 1901	accepted	urn:lsid:faunaeur.org:taxname:403586		exact			1264458	urn:lsid:globalnames.org:index:c6ffbb65-22be-5abc-815f-1a46fb72095e
Platycleis waltheri Harz, 1966	species	1142586	Platycleis waltheri	Harz, 1966	accepted	urn:lsid:faunaeur.org:taxname:403587		exact			1264464	urn:lsid:globalnames.org:index:e4c84f0f-02cd-58d1-9d30-f4ccc7ca9ce1
Platypygius crassus (Karny, 1907)	species	1103457	Platypygius crassus	(Karny, 1907)	accepted	urn:lsid:faunaeur.org:taxname:402359		exact
Platypygius platypygius (Pantel, 1886)	species	1103459	Platypygius platypygius	(Pantel, 1886)	accepted	urn:lsid:faunaeur.org:taxname:402360		exact
Platystolus martinezii (Bolívar, 1873)	species	1132403	Platystolus martinezii	(Bolivar, 1873)	accepted	urn:lsid:faunaeur.org:taxname:403118		exact
Platystolus surcularius (Bolívar, 1877)	species	1132404	Platystolus surcularius	(Bolivar, 1877)	accepted	urn:lsid:faunaeur.org:taxname:403119		exact
Podisma amedegnatoae Fontana & Pozzebon, 2007	species	1111055	Podisma amedegnatoae	Fontana & Pozzebon, 2007	accepted	urn:lsid:faunaeur.org:taxname:402666		exact
Podisma cantabricae Morales-Agacino, 1950	species	1111015	Podisma cantabricae	Morales Agacino, 1950	accepted	urn:lsid:faunaeur.org:taxname:402667		exact			938070	urn:lsid:globalnames.org:index:931294db-523a-5783-8bd9-01a108e0272a
Podisma carpetana carpetana Bolívar, 1898	subspecies	1111029	Podisma carpetana	(Bolivar, 1898)	accepted	urn:lsid:faunaeur.org:taxname:402669		unbiased infra rank	As nominal subspecies in OSF
Podisma dechambrei dechambrei Leproux, 1951	subspecies	1223026	Podisma dechambrei	Chopard, 1952	accepted	urn:lsid:faunaeur.org:taxname:402670		unbiased infra rank	As nominal subspecies in OSF
Podisma eitschbergeri Harz, 1973	species	1111016	Podisma eitschbergeri	Harz, 1973	accepted	urn:lsid:faunaeur.org:taxname:402671		exact			938085	urn:lsid:globalnames.org:index:e8e0216b-0a5a-55f5-b476-a6f19c8d39f7
Podisma emiliae Ramme, 1926	species	1111017	Podisma emiliae	Ramme, 1926	accepted	urn:lsid:faunaeur.org:taxname:402672		exact			938096	urn:lsid:globalnames.org:index:ab63fed7-cd31-55bd-96c0-6ae12a6ed27c
Podisma goidanichi (Baccetti, 1959)	species	1111012	Podisma goidanichi	Baccetti, 1958	accepted	urn:lsid:faunaeur.org:taxname:402673		exact
Podisma magdalenae Galvagni, 1971	species	1111020	Podisma magdalenae	Galvagni, 1971	accepted	urn:lsid:faunaeur.org:taxname:402674		exact			938123	urn:lsid:globalnames.org:index:7013601c-91a9-5a24-8e38-42b4a5485eda
Podisma pedestris (Linnaeus, 1758)	species	1111031	Podisma pedestris	(Linnaeus, 1758)	accepted	urn:lsid:faunaeur.org:taxname:402675		exact
Podisma ruffoi Baccetti, 1971	species	1111022	Podisma ruffoi	Baccetti, 1971	accepted	urn:lsid:faunaeur.org:taxname:402676		exact			938173	urn:lsid:globalnames.org:index:c7315358-481f-5867-aef9-88adab28208a
Podisma silvestrii Salfi, 1935	species	1111013	Podisma silvestrii	Salfi, 1935	accepted	urn:lsid:faunaeur.org:taxname:402677		exact			672870	urn:lsid:globalnames.org:index:da30557e-a771-5c90-ada0-fe89ae9e32b0
Podismopsis frontalis Mishchenko, 1951	species	1106376	Podismopsis frontalis	Mistshenko, 1951	accepted	urn:lsid:faunaeur.org:taxname:402462		exact
Podismopsis keisti (Nadig, 1989)	species	1106382	Podismopsis keisti	(Nadig, 1989)	accepted	urn:lsid:faunaeur.org:taxname:402464		exact
Podismopsis relicta Ramme, 1931	species	1106388	Podismopsis relicta	Ramme, 1931	accepted	urn:lsid:faunaeur.org:taxname:402466		exact			809534	urn:lsid:globalnames.org:index:15f697b1-631f-5932-96f9-af3a73f5a52f
Podismopsis transsylvanica Ramme, 1951	species	1106393	Podismopsis transsylvanica	Ramme, 1951	accepted	urn:lsid:faunaeur.org:taxname:402467		exact			809539	urn:lsid:globalnames.org:index:d920881a-c109-5313-8f9f-45f45f671be0
Poecilimon (Hamatopoecilimon) deplanatus Brunner von Wattenwyl, 1891	species	1138181	Poecilimon (Hamatopoecilimon) deplanatus	Brunner von Wattenwyl, 1891	accepted	urn:lsid:faunaeur.org:taxname:403313		exact
Poecilimon (Hamatopoecilimon) hamatus Brunner von Wattenwyl, 1878	species	1138184	Poecilimon (Hamatopoecilimon) hamatus	Brunner von Wattenwyl, 1878	accepted	urn:lsid:faunaeur.org:taxname:403324		exact
Poecilimon (Hamatopoecilimon) ikariensis Willemse, 1982	species	1138182	Poecilimon (Hamatopoecilimon) ikariensis	F. Willemse, 1982	accepted	urn:lsid:faunaeur.org:taxname:403329		exact
Poecilimon (Hamatopoecilimon) klausgerhardi Fontana, 2004	species	1138187	Poecilimon (Hamatopoecilimon) klausgerhardi	Fontana, 2004	accepted	urn:lsid:faunaeur.org:taxname:403337		exact
Poecilimon (Hamatopoecilimon) paros Heller & Reinhold, 1992	species	1138183	Poecilimon (Hamatopoecilimon) paros	Heller & Reinhold, 1992	accepted	urn:lsid:faunaeur.org:taxname:454504		exact
Poecilimon (Hamatopoecilimon) unispinosus Brunner von Wattenwyl, 1878	species	1138186	Poecilimon (Hamatopoecilimon) unispinosus	Brunner von Wattenwyl, 1878	accepted	urn:lsid:faunaeur.org:taxname:403368		exact
Poecilimon (Poecilimon) aegaeus Werner, 1932	species	1138028	Poecilimon (Poecilimon) aegaeus	Werner, 1932	accepted	urn:lsid:faunaeur.org:taxname:403298		exact
Poecilimon harzi Peshev, 1980	synonym species	1138045	Poecilimon (Poecilimon) affinis	Peshev, 1980	is subjective synonym of	urn:lsid:faunaeur.org:taxname:454472	urn:lsid:faunaeur.org:taxname:403299	exact
Poecilimon mistshenkoi Peshev, 1980	synonym species	1138046	Poecilimon (Poecilimon) affinis	Peshev, 1980	is subjective synonym of	urn:lsid:faunaeur.org:taxname:454470	urn:lsid:faunaeur.org:taxname:403299	exact
Poecilimon (Poecilimon) albolineatus Ingrisch & Pavicevic, 2010	species	1138080	Poecilimon (Poecilimon) albolineatus	Ingrisch & Pavicevic, 2010	accepted	urn:lsid:faunaeur.org:taxname:403300		exact
Poecilimon (Poecilimon) amissus Brunner von Wattenwyl, 1878	species	1137989	Poecilimon (Poecilimon) amissus	Brunner von Wattenwyl, 1878	accepted	urn:lsid:faunaeur.org:taxname:403301		exact
Poecilimon (Poecilimon) ampliatus Brunner von Wattenwyl, 1878	species	1137981	Poecilimon (Poecilimon) ampliatus	Brunner von Wattenwyl, 1878	accepted	urn:lsid:faunaeur.org:taxname:403302		exact
Poecilimon (Poecilimon) artedentatus Heller, 1984	species	1138062	Poecilimon (Poecilimon) artedentatus	Heller, 1984	accepted	urn:lsid:faunaeur.org:taxname:403304		exact
Poecilimon (Poecilimon) athos Tilmans, Willemse & Willemse, 1989	species	1138141	Poecilimon (Poecilimon) athos	Tilmans, Willemse F. & L., 1989	accepted	urn:lsid:faunaeur.org:taxname:403305		exact
Poecilimon (Poecilimon) bidens Retowski, 1889	species	1138166	Poecilimon (Poecilimon) bidens	Retowski, 1889	accepted	urn:lsid:faunaeur.org:taxname:403307		exact
Poecilimon (Poecilimon) bischoffi Ramme, 1933	species	1138164	Poecilimon (Poecilimon) bischoffi	Ramme, 1933	accepted	urn:lsid:faunaeur.org:taxname:403338		exact
Poecilimon (Poecilimon) bosphoricus Brunner von Wattenwyl, 1878	species	1138160	Poecilimon (Poecilimon) bosphoricus	Brunner von Wattenwyl, 1878	accepted	urn:lsid:faunaeur.org:taxname:403309		exact
Poecilimon (Poecilimon) brunneri (Frivaldszky, 1868)	species	1138082	Poecilimon (Poecilimon) brunneri	(Frivaldszky, 1867)	accepted	urn:lsid:faunaeur.org:taxname:403310		exact
Poecilimon (Poecilimon) chopardi Ramme, 1933	species	1138029	Poecilimon (Poecilimon) chopardi	Ramme, 1933	accepted	urn:lsid:faunaeur.org:taxname:403311		exact
Poecilimon (Poecilimon) cretensis Werner, 1903	species	1137939	Poecilimon (Poecilimon) cretensis	Werner, 1903	accepted	urn:lsid:faunaeur.org:taxname:403312		exact
Poecilimon (Poecilimon) ebneri Ramme, 1933	species	1137982	Poecilimon (Poecilimon) ebneri	Ramme, 1933	accepted	urn:lsid:faunaeur.org:taxname:403314		exact
Poecilimon belasicensis Popov, 1997	synonym species	1137985	Poecilimon (Poecilimon) ebneri	Popov, 1997	is subjective synonym of	urn:lsid:faunaeur.org:taxname:403315	urn:lsid:faunaeur.org:taxname:403314	exact
Poecilimon klisuriensis Willemse, 1982	synonym species	1137984	Poecilimon (Poecilimon) ebneri	F. Willemse, 1982	is subjective synonym of	urn:lsid:faunaeur.org:taxname:403316	urn:lsid:faunaeur.org:taxname:403314	exact
Poecilimon (Poecilimon) ege Ünal, 2005	species	1138014	Poecilimon (Poecilimon) ege	Unal, 2005	accepted	urn:lsid:faunaeur.org:taxname:403317		exact
Poecilimon (Poecilimon) elegans Brunner von Wattenwyl, 1878	species	1138078	Poecilimon (Poecilimon) elegans	Brunner von Wattenwyl, 1878	accepted	urn:lsid:faunaeur.org:taxname:403318		exact
Poecilimon (Poecilimon) erimanthos Willemse & Heller, 1992	species	1137942	Poecilimon (Poecilimon) erimanthos	F. Willemse & Heller, 1992	accepted	urn:lsid:faunaeur.org:taxname:403319		exact
Poecilimon (Poecilimon) fussii Fieber, 1878	species	1137972	Poecilimon (Poecilimon) fussii	Brunner von Wattenwyl, 1878	accepted	urn:lsid:faunaeur.org:taxname:403320		exact
Poecilimon (Poecilimon) gerlindae Lehmann, Willemse & Heller, 2006	species	1138038	Poecilimon (Poecilimon) gerlindae	Lehmann, F.Willemse & Heller, 2006	accepted	urn:lsid:faunaeur.org:taxname:403321		exact
Poecilimon (Poecilimon) gracilioides Willemse & Heller, 1992	species	1138053	Poecilimon (Poecilimon) gracilioides	F. Willemse & Heller, 1992	accepted	urn:lsid:faunaeur.org:taxname:403322		exact
Poecilimon (Poecilimon) gracilis (Fieber, 1853)	species	1138054	Poecilimon (Poecilimon) gracilis	(Fieber, 1853)	accepted	urn:lsid:faunaeur.org:taxname:403323		exact
Poecilimon (Poecilimon) heinrichi (Ramme, 1951)	species	1138137	Poecilimon (Poecilimon) heinrichi	(Ramme, 1951)	accepted	urn:lsid:faunaeur.org:taxname:403326		exact
Poecilimon (Poecilimon) heroicus Stshelkanovtzev, 1911	species	1138023	Poecilimon (Poecilimon) heroicus	Shchelkanovtsev, 1911	accepted	urn:lsid:faunaeur.org:taxname:403327		exact
Poecilimon (Poecilimon) hoelzeli Harz, 1966	species	1138058	Poecilimon (Poecilimon) hoelzeli	Harz, 1966	accepted	urn:lsid:faunaeur.org:taxname:403328		exact
Poecilimon kisi Peshev, 1980	synonym species	1138059	Poecilimon (Poecilimon) hoelzeli	Peshev, 1980	is subjective synonym of	urn:lsid:faunaeur.org:taxname:454473	urn:lsid:faunaeur.org:taxname:403328	exact
Poecilimon (Poecilimon) intermedius (Fieber, 1853)	species	1137987	Poecilimon (Poecilimon) intermedius	(Fieber, 1853)	accepted	urn:lsid:faunaeur.org:taxname:403330		exact
Poecilimon (Poecilimon) jablanicensis Chobanov & Heller, 2010	species	1138076	Poecilimon (Poecilimon) jablanicensis	Chobanov & Heller, 2010	accepted	urn:lsid:faunaeur.org:taxname:454466		exact
Poecilimon (Poecilimon) jonicus jonicus (Fieber, 1853)	subspecies	1137946	Poecilimon (Poecilimon) jonicus	(Fieber, 1853)	accepted	urn:lsid:faunaeur.org:taxname:403331		unbiased infra rank	As nominal subspecies in OSF
Poecilimon (Poecilimon) jonicus jonicus (Fieber, 1853)	subspecies	1137946	Poecilimon (Poecilimon) jonicus jonicus	(Fieber, 1853)	accepted	urn:lsid:faunaeur.org:taxname:403332		exact
Poecilimon (Poecilimon) jonicus lobulatus Willemse, 1982	subspecies	1137950	Poecilimon (Poecilimon) jonicus lobulatus	Willemse, 1982	accepted	urn:lsid:faunaeur.org:taxname:403333		exact
Poecilimon (Poecilimon) jonicus superbus (Fischer, 1853)	subspecies	1137951	Poecilimon (Poecilimon) jonicus superbus	(Fischer, 1853)	accepted	urn:lsid:faunaeur.org:taxname:403334		exact
Poecilimon (Poecilimon) jonicus tessellatus (Fischer, 1853)	subspecies	1137953	Poecilimon (Poecilimon) jonicus tessellatus	(Fischer, 1853)	accepted	urn:lsid:faunaeur.org:taxname:403335		exact
Poecilimon (Poecilimon) laevissimus (Fischer, 1853)	species	1137955	Poecilimon (Poecilimon) laevissimus	(Fischer, 1853)	accepted	urn:lsid:faunaeur.org:taxname:403339		exact
Poecilimon (Poecilimon) macedonicus Ramme, 1926	species	1137957	Poecilimon (Poecilimon) macedonicus	Ramme, 1926	accepted	urn:lsid:faunaeur.org:taxname:403340		exact
Poecilimon (Poecilimon) mariannae Heller, 1988	species	1138030	Poecilimon (Poecilimon) mariannae	F. Willemse & Heller, 1992	accepted	urn:lsid:faunaeur.org:taxname:403341		exact
Poecilimon (Poecilimon) marmaraensis marmaraensis Naskrecki, 1991	subspecies	1137993	Poecilimon (Poecilimon) marmaraensis	Naskrecki, 1991	accepted	urn:lsid:faunaeur.org:taxname:403342		unbiased infra rank	As nominal subspecies in OSF
Poecilimon (Poecilimon) miramae Ramme, 1933	species	1138138	Poecilimon (Poecilimon) miramae	Ramme, 1933	accepted	urn:lsid:faunaeur.org:taxname:403343		exact
Poecilimon (Poecilimon) mytilenensis mytilenensis Werner, 1932	subspecies	1138001	Poecilimon (Poecilimon) mytilenensis	Werner, 1932	accepted	urn:lsid:faunaeur.org:taxname:403345		unbiased infra rank	As nominal subspecies in OSF
Poecilimon (Poecilimon) nobilis Brunner von Wattenwyl, 1878	species	1138060	Poecilimon (Poecilimon) nobilis	Brunner von Wattenwyl, 1878	accepted	urn:lsid:faunaeur.org:taxname:403346		exact
Poecilimon (Poecilimon) obesus Brunner von Wattenwyl, 1878	species	1138063	Poecilimon (Poecilimon) obesus	Brunner von Wattenwyl, 1878	accepted	urn:lsid:faunaeur.org:taxname:403348		exact
Poecilimon (Poecilimon) orbelicus Pancic, 1883	species	1137958	Poecilimon (Poecilimon) orbelicus	Pancic, 1883	accepted	urn:lsid:faunaeur.org:taxname:403349		exact
Poecilimon (Poecilimon) ornatus (Schmidt, 1850)	species	1138065	Poecilimon (Poecilimon) ornatus	(Schmidt, 1849)	accepted	urn:lsid:faunaeur.org:taxname:403350		exact
Poecilimon (Poecilimon) pechevi Andreeva, 1978	species	1137960	Poecilimon (Poecilimon) pechevi	Andreeva, 1978	accepted	urn:lsid:faunaeur.org:taxname:403352		exact
Poecilimon (Poecilimon) pergamicus Brunner von Wattenwyl, 1891	species	1138108	Poecilimon (Poecilimon) pergamicus	Brunner von Wattenwyl, 1891	accepted	urn:lsid:faunaeur.org:taxname:403353		exact
Poecilimon (Poecilimon) pindos Willemse, 1982	species	1138072	Poecilimon (Poecilimon) pindos	F. Willemse, 1982	accepted	urn:lsid:faunaeur.org:taxname:403354		exact
Poecilimon (Poecilimon) pliginskii Miram, 1929	species	1138158	Poecilimon (Poecilimon) pliginskii	Miram, 1929	accepted	urn:lsid:faunaeur.org:taxname:403355		exact
Poecilimon (Poecilimon) propinquus Brunner von Wattenwyl, 1878	species	1138031	Poecilimon (Poecilimon) propinquus	Brunner von Wattenwyl, 1878	accepted	urn:lsid:faunaeur.org:taxname:403356		exact
Poecilimon (Poecilimon) roseoviridis Chobanov & Kaya, 2012	species	1138173	Poecilimon (Poecilimon) roseoviridis	Chobanov & Kaya, 2012	accepted	urn:lsid:faunaeur.org:taxname:454516		exact
Poecilimon (Poecilimon) sanctipauli Brunner von Wattenwyl, 1878	species	1137996	Poecilimon (Poecilimon) sanctipauli	Brunner von Wattenwyl, 1878	accepted	urn:lsid:faunaeur.org:taxname:403358		exact
Poecilimon (Poecilimon) schmidtii (Fieber, 1853)	species	1137967	Poecilimon (Poecilimon) schmidtii	(Fieber, 1853)	accepted	urn:lsid:faunaeur.org:taxname:403359		exact
Poecilimon (Poecilimon) scythicus Stshelkanovtzev, 1911	species	1138145	Poecilimon (Poecilimon) scythicus	Shchelkanovtsev, 1911	accepted	urn:lsid:faunaeur.org:taxname:403360		exact
Poecilimon (Poecilimon) soulion Willemse, 1987	species	1138073	Poecilimon (Poecilimon) soulion	L. Willemse, 1987	accepted	urn:lsid:faunaeur.org:taxname:403361		exact
Poecilimon (Poecilimon) sureyanus Uvarov, 1930	species	1138162	Poecilimon (Poecilimon) sureyanus	Uvarov, 1930	accepted	urn:lsid:faunaeur.org:taxname:403303		exact
Poecilimon anatolicus Ramme, 1933	synonym species	1138159	Poecilimon (Poecilimon) sureyanus	Ramme, 1933	is subjective synonym of	urn:lsid:faunaeur.org:taxname:454515	urn:lsid:faunaeur.org:taxname:403303	exact
Poecilimon (Poecilimon) syriacus Brunner von Wattenwyl, 1891	species	1138008	Poecilimon (Poecilimon) syriacus	Brunner von Wattenwyl, 1891	accepted	urn:lsid:faunaeur.org:taxname:403362		exact
Poecilimon (Poecilimon) tauricus Retowski, 1888	species	1138153	Poecilimon (Poecilimon) tauricus	Retowski, 1888	accepted	urn:lsid:faunaeur.org:taxname:403363		exact
Poecilimon beybienkoi Tarbinsky, 1932	synonym species	1138155	Poecilimon (Poecilimon) tauricus	Tarbinski, 1932	is subjective synonym of	urn:lsid:faunaeur.org:taxname:454518	urn:lsid:faunaeur.org:taxname:403363	exact
Poecilimon (Poecilimon) thessalicus Brunner von Wattenwyl, 1891	species	1138032	Poecilimon (Poecilimon) thessalicus	Brunner von Wattenwyl, 1891	accepted	urn:lsid:faunaeur.org:taxname:403364		exact
Poecilimon (Poecilimon) thoracicus (Fieber, 1853)	species	1137962	Poecilimon (Poecilimon) thoracicus	(Fieber, 1853)	accepted	urn:lsid:faunaeur.org:taxname:403365		exact
Poecilimon (Poecilimon) turciae (Ramme, 1951)	species	1138161	Poecilimon (Poecilimon) turciae	(Ramme, 1951)	accepted	urn:lsid:faunaeur.org:taxname:454517		exact
Poecilimon (Poecilimon) turcicus Karabag, 1950	species	1138140	Poecilimon (Poecilimon) turcicus	Karabag, 1950	accepted	urn:lsid:faunaeur.org:taxname:403366		exact
Poecilimon (Poecilimon) ukrainicus Bey-Bienko, 1951	species	1137975	Poecilimon (Poecilimon) ukrainicus	Bey-Bienko, 1951	accepted	urn:lsid:faunaeur.org:taxname:403367		exact
Rhacocleis werneri Willemse, 1982	species	1142416	Poecilimon (Poecilimon) vodnensis	Karaman, 1958	accepted	urn:lsid:faunaeur.org:taxname:403370		exact
Poecilimon (Poecilimon) werneri Ramme, 1933	species	1137965	Poecilimon (Poecilimon) werneri	Ramme, 1933	accepted	urn:lsid:faunaeur.org:taxname:403371		exact
Poecilimon (Poecilimon) zimmeri Ramme, 1933	species	1138034	Poecilimon (Poecilimon) zimmeri	Ramme, 1933	accepted	urn:lsid:faunaeur.org:taxname:403372		exact
Poecilimon (Poecilimon) zwicki Ramme, 1939	species	1137966	Poecilimon (Poecilimon) zwicki	Ramme, 1939	accepted	urn:lsid:faunaeur.org:taxname:403373		exact
Polysarcus denticauda (Charpentier, 1825)	species	1138193	Polysarcus denticauda	(Charpentier, 1825)	accepted	urn:lsid:faunaeur.org:taxname:403375		exact
Polysarcus scutatus (Brunner von Wattenwyl, 1882)	species	1138191	Polysarcus scutatus	(Brunner von Wattenwyl, 1882)	accepted	urn:lsid:faunaeur.org:taxname:403376		exact
Praephippigera pachygaster (Lucas, 1849)	species	1132407	Praephippigera pachygaster	(Lucas, 1849)	accepted	urn:lsid:faunaeur.org:taxname:403121		exact
Prionotropis appula (Costa, 1836)	species	1117537	Prionotropis appula	(Costa, 1836)	accepted	urn:lsid:faunaeur.org:taxname:402825		exact
Prionotropis flexuosa (Serville, 1838)	species	1117539	Prionotropis flexuosa	(Serville, 1839)	accepted	urn:lsid:faunaeur.org:taxname:402826		exact
Prionotropis hystrix (Germar, 1817)	species	1117550	Prionotropis hystrix	(Germar, 1817)	accepted	urn:lsid:faunaeur.org:taxname:402827		exact
Prionotropis azami Uvarov, 1923	species	1117554	Prionotropis hystrix azami	Uvarov, 1923	accepted	urn:lsid:faunaeur.org:taxname:402829		near	Species name correction
Prionotropis hystrix (Germar, 1817)	species	1117550	Prionotropis hystrix hystrix	(Germar, 1817)	accepted	urn:lsid:faunaeur.org:taxname:402828		near	Species name correction
Prionotropis rhodanica Uvarov, 1923	species	1117551	Prionotropis hystrix rhodanica	Uvarov, 1923	accepted	urn:lsid:faunaeur.org:taxname:402830		near	Species name correction		1865825	urn:lsid:globalnames.org:index:1b64d8be-21de-5c15-8685-2c68660379a9
Psalmatophanes barretoi Chopard, 1938	species	1142083	Psalmatophanes barretoi	Chopard, 1938	accepted	urn:lsid:faunaeur.org:taxname:403597		exact			1264155	urn:lsid:globalnames.org:index:c9188bde-1d10-5f52-97ae-937772321a4b
Pseudochorthippus montanus (Charpentier, 1825)	species	1106350	Pseudochorthippus montanus	(Charpentier, 1825)	accepted	urn:lsid:faunaeur.org:taxname:402589		exact
Chorthippus caffer Harz, 1975	synonym subspecies	1106344	Pseudochorthippus parallelus	Ramme, 1923	is subjective synonym of	urn:lsid:faunaeur.org:taxname:402594	urn:lsid:faunaeur.org:taxname:402593	exact
Pseudochorthippus parallelus erythropus (Faber, 1958)	subspecies	1106346	Pseudochorthippus parallelus erythropus	Faber, 1958	accepted	urn:lsid:faunaeur.org:taxname:402596		near	Authorship correction
Pseudochorthippus parallelus parallelus (Zetterstedt, 1821)	subspecies	1106328	Pseudochorthippus parallelus parallelus	(Zetterstedt, 1821)	accepted	urn:lsid:faunaeur.org:taxname:402595		exact
Pseudochorthippus parallelus tenuis (Brullé, 1832)	subspecies	1106348	Pseudochorthippus parallelus tenuis	(Brullé, 1832)	accepted	urn:lsid:faunaeur.org:taxname:402597		exact
Pseudomogoplistes byzantius Gorochov, 1995	species	1128357	Pseudomogoplistes byzantius	Gorochov, 1995	accepted	urn:lsid:faunaeur.org:taxname:403053		exact			816864	urn:lsid:globalnames.org:index:76e05a9f-5d99-54fd-8dc4-b001712fc1cf
Pseudomogoplistes madeirae Gorochov & Marshall, 2001	species	1128356	Pseudomogoplistes madeirae	Gorochov & Marshall, 2001	accepted	urn:lsid:faunaeur.org:taxname:403054		exact
Pseudomogoplistes squamiger (Fischer, 1853)	species	1128354	Pseudomogoplistes squamiger	(Fischer, 1853)	accepted	urn:lsid:faunaeur.org:taxname:403055		exact
Pseudomogoplistes vicentae vicentae Gorochov, 1996	subspecies	1128360	Pseudomogoplistes vicentae	Gorochov, 1996	accepted	urn:lsid:faunaeur.org:taxname:403056		unbiased infra rank	As nominal subspecies in OSF		1389861	urn:lsid:globalnames.org:index:c7d3e746-86e2-5a86-9368-74e73371bf0c
Sphingonotus (Sphingonotus) coerulipes uvarovianus Bey-Bienko, 1926	subspecies	1103832	Pseudopodisma fieberi	(Scudder, 1897)	accepted	urn:lsid:faunaeur.org:taxname:402663		exact
Pseudopodisma nagyi Galvagni & Fontana, 1996	species	1111112	Pseudopodisma nagyi	Galvagni & Fontana, 1996	accepted	urn:lsid:faunaeur.org:taxname:402664		exact
Pseudopodisma transilvanica Galvagni & Fontana, 1993	species	1111111	Pseudopodisma transilvanica	Galvagni & Fontana, 1993	accepted	urn:lsid:faunaeur.org:taxname:402665		exact
Pseudoprumna baldensis (Krauss, 1883)	species	1110932	Pseudoprumna baldensis	(Krauss, 1883)	accepted	urn:lsid:faunaeur.org:taxname:402661		exact
Psophus stridulus (Linnaeus, 1758)	species	1103244	Psophus stridulus	(Linnaeus, 1758)	accepted	urn:lsid:faunaeur.org:taxname:402353		exact
Psorodonotus fieberi (Frivaldszky, 1853)	species	1142320	Psorodonotus fieberi	(Fieber, 1853)	accepted	urn:lsid:faunaeur.org:taxname:403599		near	Species name correction
Psorodonotus illyricus Ebner, 1923	species	1142322	Psorodonotus fieberi illyricus	Ebner, 1923	accepted	urn:lsid:faunaeur.org:taxname:403601		near	Species name correction
Psorodonotus macedonicus Ramme, 1931	species	1142323	Psorodonotus fieberi macedonicus	Ramme, 1931	accepted	urn:lsid:faunaeur.org:taxname:403602		near	Species name correction
Rhacocleis agiostratica Werner, 1937	species	1142390	Pterolepis agiostratica	(Werner, 1874)	accepted	urn:lsid:faunaeur.org:taxname:403604		near	Genus name correction
Rhacocleis anatolica Werner, 1933	species	1142419	Pterolepis anatolica	(Werner, 1933)	accepted	urn:lsid:faunaeur.org:taxname:403605		near	Genus name correction
Rhacocleis annulata Fieber, 1853	species	1142391	Pterolepis annulata	(Fieber, 1853)	accepted	urn:lsid:faunaeur.org:taxname:403606		near	Genus name correction
Rhacocleis baccettii Galvagni, 1976	species	1142394	Pterolepis baccettii	(Galvagni, 1976)	accepted	urn:lsid:faunaeur.org:taxname:403607		near	Genus name correction
Rhacocleis bonfilsi Galvagni, 1976	species	1142395	Pterolepis bonfilsi	(Galvagni, 1976)	accepted	urn:lsid:faunaeur.org:taxname:403608		near	Genus name correction
Rhacocleis buchichii Herman, 1874	species	1142396	Pterolepis bucchicii	(Herman, 1874)	accepted	urn:lsid:faunaeur.org:taxname:403609		near	Genus name correction
Pterolepis cordubensis Bolívar, 1900	species	1142345	Pterolepis cordubensis	Bolivar, 1900	accepted	urn:lsid:faunaeur.org:taxname:403610		exact
Xiphidiopsis (Xiphidiopsis) minorincisus Han, Chang & Shi, 2015	species	1223460	Pterolepis corsicana	Galvagni, 1991	is subjective synonym of	urn:lsid:faunaeur.org:taxname:454475		exact
Rhacocleis crypta Willemse & Willemse, 2005	species	1142379	Pterolepis crypta	(F. Willemse & L.Willemse, 2005)	accepted	urn:lsid:faunaeur.org:taxname:403612		near	Genus name correction
Rhacocleis derrai Harz, 1983	species	1142399	Pterolepis derrai	(Harz, 1983)	accepted	urn:lsid:faunaeur.org:taxname:403613		near	Genus name correction
Rhacocleis distinguenda Werner, 1934	species	1142400	Pterolepis distinguenda	(Werner, 1934)	accepted	urn:lsid:faunaeur.org:taxname:403614		near	Genus name correction
Rhacocleis edentata Willemse, 1982	species	1142401	Pterolepis edentata	(F. Willemse, 1982)	accepted	urn:lsid:faunaeur.org:taxname:403615		near	Genus name correction
Pterolepis elymica Galvagni & Massa, 1980	species	1142337	Pterolepis elymica	Galvagni & Massa, 1980	accepted	urn:lsid:faunaeur.org:taxname:403616		exact
Rhacocleis ferdinandi Willemse & Tilmans, 1987	species	1142402	Pterolepis ferdinandi	(L.Willemse & Tilmans, 1987)	accepted	urn:lsid:faunaeur.org:taxname:403617		near	Genus name correction
Rhacocleis germanica (Herrich-Schäffer, 1840)	species	1142384	Pterolepis germanica	(Herrich-Schäffer, 1840)	accepted	urn:lsid:faunaeur.org:taxname:403618		near	Genus name correction
Rhacocleis graeca Uvarov, 1942	species	1142403	Pterolepis graeca	(Uvarov, 1942)	accepted	urn:lsid:faunaeur.org:taxname:403619		near	Genus name correction
Pterolepis grallata (Pantel, 1886)	species	1142371	Pterolepis grallata	(Pantel, 1886)	accepted	urn:lsid:faunaeur.org:taxname:403632		exact
Rhacocleis insularis Ramme, 1928	species	1142404	Pterolepis insularis	(Ramme, 1928)	accepted	urn:lsid:faunaeur.org:taxname:403620		near	Genus name correction
Rhacocleis japygia La Greca, 1959	species	1142420	Pterolepis japygia	(La Greca, 1959)	accepted	urn:lsid:faunaeur.org:taxname:403621		near	Genus name correction
Rhacocleis lithoscirtetes Willemse & Willemse, 2005	species	1142378	Pterolepis lithoscirtetes	(F. Willemse & L.Willemse, 2005)	accepted	urn:lsid:faunaeur.org:taxname:403622		near	Genus name correction
Pterolepis lusitanica (Bolívar, 1900)	species	1142367	Pterolepis lusitanica	(Bolivar, 1900)	accepted	urn:lsid:faunaeur.org:taxname:403623		exact
Rhacocleis grisea Baccetti, 1991	synonym species	1142382	Pterolepis maculipedes	Baccetti, 1991	is subjective synonym of	urn:lsid:faunaeur.org:taxname:403625	urn:lsid:faunaeur.org:taxname:403624	exact
Rhacocleis neglecta (Costa, 1863)	species	1142406	Pterolepis neglecta	Costa, 1863	accepted	urn:lsid:faunaeur.org:taxname:403627		near	Genus name correction
Pterolepis pedata Costa, 1882	species	1142348	Pterolepis pedata	Costa, 1882	accepted	urn:lsid:faunaeur.org:taxname:403628		exact			5998545	urn:lsid:globalnames.org:index:9d31dd08-3646-5a21-a1d0-aa0f0042069f
Rhacocleis poneli Harz & Voisin, 1987	species	1142409	Pterolepis poneli	(Harz & Voisin, 1987)	accepted	urn:lsid:faunaeur.org:taxname:403629		near	Genus name correction
Rhacocleis silvestrii Ramme, 1939	species	1142411	Pterolepis silvestrii	(Ramme, 1936)	accepted	urn:lsid:faunaeur.org:taxname:403630		near	Genus name correction
Pterolepis spoliata Rambur, 1838	species	1142350	Pterolepis spoliata	Rambur, 1839	accepted	urn:lsid:faunaeur.org:taxname:403631		exact			622297	urn:lsid:globalnames.org:index:95ed95cc-ab10-55d6-9413-9983bcd96695
Pterolepis spoliata kaltenbachi Galvagni, 1981	subspecies	1142351	Pterolepis spoliata kaltenbachi	Galvagni, 1981	accepted	urn:lsid:faunaeur.org:taxname:403633		exact
Pterolepis spoliata llorenteae Galvagni, 1981	subspecies	1142352	Pterolepis spoliata llorente	Galvagni, 1981	accepted	urn:lsid:faunaeur.org:taxname:403634		exact
Pterolepis spoliata minor Bolívar, 1900	subspecies	1142353	Pterolepis spoliata minor	Bolivar, 1899	accepted	urn:lsid:faunaeur.org:taxname:403635		exact
Pterolepis spoliata nadigi Galvagni, 1981	subspecies	1142354	Pterolepis spoliata nadigi	Galvagni, 1981	accepted	urn:lsid:faunaeur.org:taxname:403636		exact
Pterolepis spoliata nevadensis Galvagni, 1981	subspecies	1142355	Pterolepis spoliata nevadensis	Galvagni, 1981	accepted	urn:lsid:faunaeur.org:taxname:403637		exact
Pterolepis spoliata pascuali Galvagni, 1981	subspecies	1142356	Pterolepis spoliata pascuali	Galvagni, 1981	accepted	urn:lsid:faunaeur.org:taxname:403638		exact
Pterolepis spoliata raggei Galvagni, 1981	subspecies	1142357	Pterolepis spoliata raggei	Galvagni, 1981	accepted	urn:lsid:faunaeur.org:taxname:403639		exact
Pterolepis spoliata spoliata Rambur, 1838	subspecies	1142358	Pterolepis spoliata spoliata	Rambur, 1839	accepted	urn:lsid:faunaeur.org:taxname:403640		exact
Rhacocleis thyrrhenica La Greca, 1952	species	1142412	Pterolepis thyrrhenica	(La Greca, 1952)	accepted	urn:lsid:faunaeur.org:taxname:403641		near	Genus name correction
Rhacocleis trilobata La Greca & Messina, 1974	species	1142413	Pterolepis trilobata	(La Greca & Messina, 1974)	accepted	urn:lsid:faunaeur.org:taxname:403642		near	Genus name correction
Rhacocleis uvarovi Ramme, 1936	species	1142414	Pterolepis uvarovi	(Ramme, 1936)	accepted	urn:lsid:faunaeur.org:taxname:403643		near	Genus name correction
Rhacocleis werneri Willemse, 1982	species	1142416	Pterolepis werneri	(F. Willemse, 1982)	accepted	urn:lsid:faunaeur.org:taxname:403644		near	Genus name correction
Pteronemobius (Pteronemobius) heydenii heydenii (Fischer, 1853)	subspecies	1121823	Pteronemobius heydenii	(Fischer, 1853)	accepted	urn:lsid:faunaeur.org:taxname:402927		near	(Sub)genus name correction
Pteronemobius (Stilbonemobius) lineolatus (Brullé, 1835)	species	1121728	Pteronemobius lineolatus	(Brullé, 1835)	accepted	urn:lsid:faunaeur.org:taxname:402928		exact
Purpuraria erna Enderlein, 1929	species	1116935	Purpuraria erna	Enderlein, 1929	accepted	urn:lsid:faunaeur.org:taxname:402769		exact			665670	urn:lsid:globalnames.org:index:6cac2f01-fe8c-5ac4-a511-be033e6d9b76
Pycnogaster (Bradygaster) algecirensis Bolívar, 1926	species	1132308	Pycnogaster (Bradygaster) algecirensis	Bolivar, 1926	accepted	urn:lsid:faunaeur.org:taxname:403163		exact
Pycnogaster (Bradygaster) gaditana Bolívar, 1900	species	1132314	Pycnogaster (Bradygaster) gaditana	Bolivar, 1899	accepted	urn:lsid:faunaeur.org:taxname:403164		exact
Pycnogaster (Bradygaster) inermis (Rambur, 1838)	species	1132315	Pycnogaster (Bradygaster) inermis	(Rambur, 1838)	accepted	urn:lsid:faunaeur.org:taxname:403165		exact
Pycnogaster (Bradygaster) sanchezgomezi sanchezgomezi Bolívar, 1897	subspecies	1132318	Pycnogaster (Bradygaster) sanchezgomezi	Bolivar, 1897	accepted	urn:lsid:faunaeur.org:taxname:403166		unbiased infra rank	As nominal subspecies in OSF
Pycnogaster (Pycnogaster) cucullatus (Charpentier, 1825)	species	1132321	Pycnogaster (Pycnogaster) cucullata	(Charpentier, 1825)	accepted	urn:lsid:faunaeur.org:taxname:403168		near	Species name correction
Pycnogaster (Pycnogaster) graellsii Bolívar, 1873	species	1132322	Pycnogaster (Pycnogaster) graellsii	Bolivar, 1873	accepted	urn:lsid:faunaeur.org:taxname:403169		exact
Pycnogaster (Pycnogaster) jugicola Graells, 1851	species	1132323	Pycnogaster (Pycnogaster) jugicola	Graells, 1851	accepted	urn:lsid:faunaeur.org:taxname:403170		exact
Pycnogaster (Pycnogaster) valentini Pinedo, 1987	species	1132326	Pycnogaster (Pycnogaster) valentini	Pinedo & Llorente, 1987	accepted	urn:lsid:faunaeur.org:taxname:403171		exact
Pyrgodera armata Fischer von Waldheim, 1846	species	1103252	Pyrgodera armata	Fischer de Waldheim, 1846	accepted	urn:lsid:faunaeur.org:taxname:402351		exact
Pyrgomorpha (Pyrgomorpha) bispinosa bispinosa Walker, 1870	subspecies	1121101	Pyrgomorpha bispinosa	Walker, 1870	accepted	urn:lsid:faunaeur.org:taxname:402845		near	Subgenus name correction. As nominal subspecies in OSF		17650230	urn:lsid:globalnames.org:index:75132bcc-9786-589b-8618-c520e2c8b3d5
Pyrgomorpha (Pyrgomorpha) cognata cognata Krauss, 1877	subspecies	1121109	Pyrgomorpha cognata	Krauss, 1877	accepted	urn:lsid:faunaeur.org:taxname:402847		near	Subgenus name correction. As nominal subspecies in OSF		619776	urn:lsid:globalnames.org:index:86e01416-8e3b-59bc-90a1-0b22606d2de1
Pyrgomorpha (Pyrgomorpha) conica (Olivier, 1791)	species	1121059	Pyrgomorpha conica	(Olivier, 1791)	accepted	urn:lsid:faunaeur.org:taxname:402846		near	Subgenus name correction
Pyrgomorpha (Pyrgomorpha) cypria Bolívar, 1901	species	1121044	Pyrgomorpha cypria	Bolivar, 1901	accepted	urn:lsid:faunaeur.org:taxname:402848		exact			17328176	urn:lsid:globalnames.org:index:71ca0b48-d257-5d0d-8640-6a519f8074f0
Pyrgomorpha cyprica Steinmann, 1967	synonym species	1121045	Pyrgomorpha cypria	Bolivar, 1901	accepted	urn:lsid:faunaeur.org:taxname:402848	urn:lsid:faunaeur.org:taxname:402848	near	Authorship correction		17328176	urn:lsid:globalnames.org:index:71ca0b48-d257-5d0d-8640-6a519f8074f0
Ramburiella (Ramburiella) hispanica (Rambur, 1838)	species	1107447	Ramburiella hispanica	(Rambur, 1838)	accepted	urn:lsid:faunaeur.org:taxname:402460		exact
Rammeihippus dinaricus (Götz, 1970)	species	1112268	Rammeihippus dinaricus	(Goetz, 1970)	accepted	urn:lsid:faunaeur.org:taxname:402458		exact
Roeseliana roeselii roeselii (Hagenbach, 1822)	subspecies	1142456	Roeseliana roeselii	(Hagenbach, 1822)	accepted	urn:lsid:faunaeur.org:taxname:403512		unbiased infra rank	As nominal subspecies in OSF
Ruspolia nitidula (Scopoli, 1786)	species	1134338	Ruspolia nitidula	(Scopoli, 1786)	accepted	urn:lsid:faunaeur.org:taxname:403186		exact
Sabaterpia hispanica (Kollar, 1853)	species	1132568	Sabaterpia hispanica	(Fieber, 1853)	accepted	urn:lsid:faunaeur.org:taxname:403103		exact
Sabaterpia paulinoi (Bolívar, 1877)	species	1132569	Sabaterpia paulinoi	(Bolivar, 1877)	accepted	urn:lsid:faunaeur.org:taxname:403108		exact
Sabaterpia taeniata (Saussure, 1898)	species	1132570	Sabaterpia taeniata	(Saussure, 1898)	accepted	urn:lsid:faunaeur.org:taxname:403110		exact
Saga campbelli Uvarov, 1921	species	1141584	Saga campbelli	Uvarov, 1921	accepted	urn:lsid:faunaeur.org:taxname:403383		exact			622624	urn:lsid:globalnames.org:index:0f4cf8c0-791e-5506-8f33-0b168b9634e0
Saga hellenica Kaltenbach, 1967	species	1141587	Saga hellenica	Kaltenbach, 1967	accepted	urn:lsid:faunaeur.org:taxname:403384		exact			1263964	urn:lsid:globalnames.org:index:6797f2a4-4287-50a9-99fc-cc239e758ae8
Saga natoliae Serville, 1838	species	1141589	Saga natoliae	Serville, 1839	accepted	urn:lsid:faunaeur.org:taxname:403385		exact
Saga pedo (Pallas, 1771)	species	1141601	Saga pedo	(Pallas, 1771)	accepted	urn:lsid:faunaeur.org:taxname:403386		exact
Saga rammei Kaltenbach, 1965	species	1141588	Saga rammei	Kaltenbach, 1965	accepted	urn:lsid:faunaeur.org:taxname:403387		exact			1263965	urn:lsid:globalnames.org:index:df5fd8de-bb08-58fd-acd0-5f62f4bee34c
Saga rhodiensis Salfi, 1929	species	1141613	Saga rhodiensis	Salfi, 1929	accepted	urn:lsid:faunaeur.org:taxname:403388		exact			230798	urn:lsid:globalnames.org:index:a1f92264-241a-51d0-9a54-f64f653b5305
Sardoplatycleis galvagnii (Fontana, Buzzetti, Kleukers & Odé, 2011)	species	1142447	Sardoplatycleis galvagnii	(Fontana, Buzzetti, Kleukers & Odé, 2011)	accepted	urn:lsid:faunaeur.org:taxname:454479		exact
Schistocerca gregaria gregaria (Forskål, 1775)	subspecies	1112360	Schistocerca gregaria	(ForskÂl, 1775)	accepted	urn:lsid:faunaeur.org:taxname:402652		unbiased infra rank	As nominal subspecies in OSF
Scintharista notabilis notabilis (Walker, 1870)	subspecies	1103264	Scintharista notabilis	(Walker, 1870)	accepted	urn:lsid:faunaeur.org:taxname:402349		unbiased infra rank	As nominal subspecies in OSF
Sciobia (Sciobia) barbara (Saussure, 1877)	species	1123477	Sciobia barbara	(Saussure, 1877)	accepted	urn:lsid:faunaeur.org:taxname:402988		exact
Sciobia (Sciobia) boscai Bolívar, 1925	species	1123519	Sciobia boscai	Bolivar, 1925	accepted	urn:lsid:faunaeur.org:taxname:402989		exact
Sciobia (Thliptoblemmus) caliendra caliendra (Fischer, 1853)	subspecies	1123463	Sciobia caliendrum	(Fischer, 1853)	accepted	urn:lsid:faunaeur.org:taxname:402990		near	Subgenus name correction. As nominal subspecies in OSF
Sciobia (Sciobia) lusitanica (Rambur, 1838)	species	1123480	Sciobia lusitanica	(Rambur, 1839)	accepted	urn:lsid:faunaeur.org:taxname:402991		exact
Sciobia (Thliptoblemmus) natalia Gorochov, 1985	species	1123460	Sciobia natalia	Gorochov, 1985	accepted	urn:lsid:faunaeur.org:taxname:402992		exact			817945	urn:lsid:globalnames.org:index:ba72855f-8a2a-5887-a888-d060109130f5
Sepiana sepium (Yersin, 1854)	species	1142680	Sepiana sepium	(Yersin, 1854)	accepted	urn:lsid:faunaeur.org:taxname:403646		exact
Sorapagus catalaunicus (Bolívar, 1898)	species	1132574	Sorapagus catalaunicus	(Bolivar, 1898)	accepted	urn:lsid:faunaeur.org:taxname:403133		exact
Sphingoderus carinatus (Saussure, 1888)	species	1103651	Sphingoderus carinatus	(Saussure, 1888)	accepted	urn:lsid:faunaeur.org:taxname:402347		exact
Sphingonotus (Neosphingonotus) azurescens (Rambur, 1838)	species	1103950	Sphingonotus (Neosphingonotus) azurescens	(Rambur, 1838)	accepted	urn:lsid:faunaeur.org:taxname:402354		exact
Sphingonotus (Neosphingonotus) canariensis canariensis Saussure, 1884	subspecies	1103953	Sphingonotus (Neosphingonotus) canariensis	Saussure, 1884	accepted	urn:lsid:faunaeur.org:taxname:402322		unbiased infra rank	As nominal subspecies in OSF
Sphingonotus (Neosphingonotus) fuerteventurae Husemann, 2008	species	1103959	Sphingonotus (Neosphingonotus) fuerteventurae	Husemann, 2008	accepted	urn:lsid:faunaeur.org:taxname:454508		exact
Sphingonotus (Neosphingonotus) morini (Defaut, 2005)	species	1103958	Sphingonotus (Neosphingonotus) morini	Defaut, 2005	accepted	urn:lsid:faunaeur.org:taxname:402356		exact
Sphingonotus (Neosphingonotus) pachecoi (Bolívar, 1908)	species	1103946	Sphingonotus (Neosphingonotus) pachecoi	(Bolivar, 1908)	accepted	urn:lsid:faunaeur.org:taxname:454509		exact
Sphingonotus (Neosphingonotus) sublaevis (Bolívar, 1908)	species	1103944	Sphingonotus (Neosphingonotus) sublaevis	(Bolivar, 1908)	accepted	urn:lsid:faunaeur.org:taxname:402343		exact
Sphingonotus (Sphingonotus) caerulans caerulans (Linnaeus, 1767)	subspecies	1103815	Sphingonotus (Sphingonotus) caerulans	(Linnaeus, 1767)	accepted	urn:lsid:faunaeur.org:taxname:402321		unbiased infra rank	As nominal subspecies in OSF
Sphingonotus (Sphingonotus) candidus Costa, 1885	species	1103811	Sphingonotus (Sphingonotus) candidus	Costa, 1888	accepted	urn:lsid:faunaeur.org:taxname:402323		exact
Sphingonotus (Sphingonotus) lusitanicus Ebner, 1941	species	1103813	Sphingonotus (Sphingonotus) candidus lusitanicus	Ebner, 1941	accepted	urn:lsid:faunaeur.org:taxname:402325		near	Species name correction. As nominal subspecies in OSF
Sphingonotus (Sphingonotus) coerulipes Uvarov, 1922	species	1103827	Sphingonotus (Sphingonotus) coerulipes	Uvarov, 1922	accepted	urn:lsid:faunaeur.org:taxname:402326		exact
Sphingonotus (Sphingonotus) corsicus Chopard, 1924	species	1103826	Sphingonotus (Sphingonotus) corsicus	Chopard, 1923	accepted	urn:lsid:faunaeur.org:taxname:402327		exact
Sphingonotus (Sphingonotus) crivellarii Jannone, 1936	species	1103716	Sphingonotus (Sphingonotus) crivellarii	Jannone, 1936	accepted	urn:lsid:faunaeur.org:taxname:402328		exact
Sphingonotus (Sphingonotus) eurasius Mishchenko, 1937	species	1103834	Sphingonotus (Sphingonotus) eurasius	Mistshenko, 1936	accepted	urn:lsid:faunaeur.org:taxname:402329		exact
Sphingonotus (Sphingonotus) gypsicola Llucià Pomares, 2006	species	1103927	Sphingonotus (Sphingonotus) gypsicola	Llucia-Pomares, 2006	accepted	urn:lsid:faunaeur.org:taxname:402330		exact
Sphingonotus (Sphingonotus) halocnemi Uvarov, 1925	species	1103731	Sphingonotus (Sphingonotus) halocnemi	Uvarov, 1925	accepted	urn:lsid:faunaeur.org:taxname:402331		exact
Sphingonotus (Sphingonotus) halophilus Bey-Bienko, 1929	species	1103732	Sphingonotus (Sphingonotus) halophilus	Bey-Bienko, 1929	accepted	urn:lsid:faunaeur.org:taxname:402332		exact
Sphingonotus (Sphingonotus) lluciapomaresi (Defaut, 2005)	species	1103926	Sphingonotus (Sphingonotus) lluciapomaresi	(Defaut, 2005)	accepted	urn:lsid:faunaeur.org:taxname:402334		exact
Sphingonotus (Sphingonotus) maculatus Uvarov, 1925	species	1103857	Sphingonotus (Sphingonotus) maculatus	Uvarov, 1925	accepted	urn:lsid:faunaeur.org:taxname:402335		exact
Sphingonotus (Sphingonotus) nebulosus (Fischer von Waldheim, 1846)	species	1103863	Sphingonotus (Sphingonotus) nebulosus	(Fischer de Waldheim, 1846)	accepted	urn:lsid:faunaeur.org:taxname:402336		exact
Sphingonotus (Sphingonotus) obscuratus (Walker, 1870)	species	1103869	Sphingonotus (Sphingonotus) obscuratus	(Walker, 1879)	accepted	urn:lsid:faunaeur.org:taxname:402337		exact
Sphingonotus (Sphingonotus) obscuratus lameerei Finot, 1902	subspecies	1103874	Sphingonotus (Sphingonotus) octofasciatus	(Serville, 1839)	accepted	urn:lsid:faunaeur.org:taxname:402338		near	Authorship correction
Sphingonotus (Sphingonotus) personatus Zanon, 1926	species	1103769	Sphingonotus (Sphingonotus) personatus	Zanon, 1926	accepted	urn:lsid:faunaeur.org:taxname:402339		exact
Sphingonotus (Sphingonotus) rubescens rubescens (Walker, 1870)	subspecies	1103883	Sphingonotus (Sphingonotus) rubescens	(Walker, 1870)	accepted	urn:lsid:faunaeur.org:taxname:402340		unbiased infra rank	As nominal subspecies in OSF
Sphingonotus (Sphingonotus) salinus (Pallas, 1773)	species	1103776	Sphingonotus (Sphingonotus) salinus	(Pallas, 1773)	accepted	urn:lsid:faunaeur.org:taxname:402341		exact
Sphingonotus (Sphingonotus) savignyi Saussure, 1884	species	1103853	Sphingonotus (Sphingonotus) savignyi	Saussure, 1884	accepted	urn:lsid:faunaeur.org:taxname:402342		exact
Sphingonotus (Sphingonotus) uvarovi Chopard, 1924	species	1103784	Sphingonotus (Sphingonotus) uvarovi	Chopard, 1923	accepted	urn:lsid:faunaeur.org:taxname:402344		exact
Sphingonotus (Sphingonotus) willemsei Mishchenko, 1937	species	1103787	Sphingonotus (Sphingonotus) willemsei	Mistshenko, 1937	accepted	urn:lsid:faunaeur.org:taxname:402345		exact
Sporadiana sporadarum (Werner, 1933)	species	1142704	Sporadiana sporadarum	(Werner, 1933)	accepted	urn:lsid:faunaeur.org:taxname:403593		exact
Stauroderus scalaris scalaris (Fischer von Waldheim, 1846)	subspecies	1106275	Stauroderus scalaris	(Fischer de Waldheim, 1846)	accepted	urn:lsid:faunaeur.org:taxname:402456		unbiased infra rank	As nominal subspecies in OSF
Stenobothrus apenninus Ebner, 1915	species	1107364	Stenobothrus apenninus	Ebner, 1915	accepted	urn:lsid:faunaeur.org:taxname:402432		exact
Stenobothrus bolivarii (Brunner von Wattenwyl, 1876)	species	1107366	Stenobothrus bolivarii	(Brunner von Wattenwyl in Bolivar, 1876)	accepted	urn:lsid:faunaeur.org:taxname:402434		exact
Stenobothrus carbonarius (Eversmann, 1848)	species	1107430	Stenobothrus carbonarius	(Eversmann, 1848)	accepted	urn:lsid:faunaeur.org:taxname:402436		exact
Stenobothrus clavatus Willemse, 1979	species	1107362	Stenobothrus clavatus	Willemse, 1979	accepted	urn:lsid:faunaeur.org:taxname:402437		exact
Stenobothrus cotticus Kruseman & Jeekel, 1967	species	1107348	Stenobothrus cotticus	(Kruseman & Jeekel, 1967)	accepted	urn:lsid:faunaeur.org:taxname:402438		exact
Stenobothrus crassipes (Charpentier, 1825)	species	1107368	Stenobothrus crassipes	(Charpentier, 1825)	accepted	urn:lsid:faunaeur.org:taxname:402439		exact
Stenobothrus croaticus Ramme, 1933	species	1107349	Stenobothrus croaticus	(Ramme, 1933)	accepted	urn:lsid:faunaeur.org:taxname:402440		exact			809340	urn:lsid:globalnames.org:index:c79df62f-ad40-523a-a590-ab7b6763c9df
Stenobothrus eurasius eurasius Zubovski, 1898	subspecies	1107387	Stenobothrus eurasius	Zubovskii, 1898	accepted	urn:lsid:faunaeur.org:taxname:402441		unbiased infra rank	As nominal subspecies in OSF
Stenobothrus festivus Bolívar, 1887	species	1107371	Stenobothrus festivus	Bolivar, 1887	accepted	urn:lsid:faunaeur.org:taxname:402443		exact			6819163	urn:lsid:globalnames.org:index:b4712863-12b3-5ebf-8f39-8c4bea5a1a3d
Stenobothrus fischeri (Eversmann, 1848)	species	1107392	Stenobothrus fischeri	(Eversmann, 1848)	accepted	urn:lsid:faunaeur.org:taxname:402444		exact
Stenobothrus graecus Ramme, 1926	species	1107398	Stenobothrus graecus	Ramme, 1926	accepted	urn:lsid:faunaeur.org:taxname:402445		exact			672723	urn:lsid:globalnames.org:index:326cd6d8-00b9-5087-aef2-ee5fbb33f209
Stenobothrus grammicus Cazurro y Ruiz, 1888	species	1107372	Stenobothrus grammicus	Cazurro, 1888	accepted	urn:lsid:faunaeur.org:taxname:402446		exact			13057482	urn:lsid:globalnames.org:index:792ad2a8-e2ef-571d-b36c-2ce06544d77a
Stenobothrus lineatus (Panzer, 1796)	species	1107404	Stenobothrus lineatus	(Panzer, 1796)	accepted	urn:lsid:faunaeur.org:taxname:402447		exact			19080635	urn:lsid:globalnames.org:index:32c161e0-da45-5d29-b620-97660a3096c5
Stenobothrus miramae Dirsh, 1931	species	1107377	Stenobothrus miramae	Dirsh, 1931	accepted	urn:lsid:faunaeur.org:taxname:402448		exact			809367	urn:lsid:globalnames.org:index:16086c27-f992-557d-bdac-738aac5a04ba
Stenobothrus bulgaricus Ramme, 1933	synonym species	1107416	Stenobothrus nigromaculatus	Ramme, 1933	is subjective synonym of	urn:lsid:faunaeur.org:taxname:454514	urn:lsid:faunaeur.org:taxname:402449	exact			18362826	urn:lsid:globalnames.org:index:e072f259-4e2f-55ae-b111-97ce9026fdb0
Stenobothrus posthumus Ramme, 1931	species	1107380	Stenobothrus posthumus	Ramme, 1931	accepted	urn:lsid:faunaeur.org:taxname:402450		exact			809372	urn:lsid:globalnames.org:index:326490ec-b986-5ae0-ab07-722403d0a5d1
Stenobothrus rubicundulus Kruseman & Jeekel, 1967	species	1107356	Stenobothrus rubicundulus	Kruseman & Jeekel, 1967	accepted	urn:lsid:faunaeur.org:taxname:402451		exact
Stenobothrus rubicundus	synonym species	1107357	Stenobothrus rubicundulus	Kruseman & Jeekel, 1967	accepted	urn:lsid:faunaeur.org:taxname:402451	urn:lsid:faunaeur.org:taxname:402451	near	Misspelling species name
Stenobothrus stigmaticus (Rambur, 1838)	species	1107422	Stenobothrus stigmaticus	(Rambur, 1838)	accepted	urn:lsid:faunaeur.org:taxname:402452		exact
Stenobothrus ursulae Nadig, 1986	species	1107383	Stenobothrus ursulae	Nadig, 1986	accepted	urn:lsid:faunaeur.org:taxname:402453		exact			809375	urn:lsid:globalnames.org:index:7689c7ab-dfdb-509d-985d-e41e38d3687b
Stenobothrus nadigi La Greca, 1986	synonym species	1107384	Stenobothrus ursulae	La Greca, 1985	is subjective synonym of	urn:lsid:faunaeur.org:taxname:402454	urn:lsid:faunaeur.org:taxname:402453	exact
Stenohippus mundus (Walker, 1871)	species	1107155	Stenohippus mundus	(Walker, 1871)	accepted	urn:lsid:faunaeur.org:taxname:402430		exact
Stenobothrus bonneti Bolívar, 1885	synonym species	1107157	Stenohippus mundus	Bolivar, 1885	is subjective synonym of	urn:lsid:faunaeur.org:taxname:402431	urn:lsid:faunaeur.org:taxname:402430	exact
Stenonemobius (Ocellonemobius) bicolor bicolor (Saussure, 1877)	subspecies	1121870	Stenonemobius bicolor	(Saussure, 1877)	accepted	urn:lsid:faunaeur.org:taxname:402924		near	Subgenus name correction. As nominal subspecies in OSF
Stenonemobius (Stenonemobius) gracilis (Jakovlev, 1871)	species	1121866	Stenonemobius gracilis	(Jakovlev, 1871)	accepted	urn:lsid:faunaeur.org:taxname:402925		exact
Steropleurus andalusius andalusius (Rambur, 1838)	subspecies	1132497	Steropleurus andalusius	(Rambur, 1838)	accepted	urn:lsid:faunaeur.org:taxname:403126		unbiased infra rank	As nominal subspecies in OSF
Steropleurus brunnerii (Bolívar, 1877)	species	1132500	Steropleurus brunnerii	(Bolivar, 1877)	accepted	urn:lsid:faunaeur.org:taxname:403131		exact
Steropleurus castellanus (Bolívar, 1878)	species	1132501	Steropleurus castellanus	(Bolivar, 1878)	accepted	urn:lsid:faunaeur.org:taxname:403132		exact
Steropleurus flavovittatus (Bolívar, 1878)	species	1132503	Steropleurus flavovittatus	(Bolivar, 1878)	accepted	urn:lsid:faunaeur.org:taxname:403139		exact
Steropleurus obsoletus (Bolívar, 1898)	species	1132504	Steropleurus obsoletus	(Bolivar, 1898)	accepted	urn:lsid:faunaeur.org:taxname:403143		exact
Steropleurus pseudolus (Bolívar, 1878)	species	1132505	Steropleurus pseudolus	(Bolivar, 1878)	accepted	urn:lsid:faunaeur.org:taxname:403148		exact
Steropleurus recticarinatus (Llorente del Moral, 1980)	species	1132506	Steropleurus recticarinatus	Llorente, 1978	accepted	urn:lsid:faunaeur.org:taxname:403149		exact
Stethophyma grossum (Linnaeus, 1758)	species	1104012	Stethophyma grossum	(Linnaeus, 1758)	accepted	urn:lsid:faunaeur.org:taxname:402319		exact
Svercus palmetorum palmetorum (Krauss, 1902)	subspecies	1122331	Svercus palmetorum	(Krauss, 1902)	accepted	urn:lsid:faunaeur.org:taxname:402986		unbiased infra rank	As nominal subspecies in OSF
Synephippius obvius (Navás, 1904)	species	1132334	Synephippius obvius	(Navàs, 1904)	accepted	urn:lsid:faunaeur.org:taxname:403123		exact
Diestrammena (Tachycines) asynamora (Adelung, 1902)	species	1129781	Tachycines asynamorus	Adelung, 1902	accepted	urn:lsid:faunaeur.org:taxname:402866		near	Subgenus name correction. As nominal subspecies in OSF		616754	urn:lsid:globalnames.org:index:47ecc5b3-511c-58e8-a030-4e026b19eaac
Tartarogryllus sandanski Andreeva, 1982	species	1122664	Tartarogryllus sandanski	Andreeva, 1982	accepted	urn:lsid:faunaeur.org:taxname:402983		exact			817383	urn:lsid:globalnames.org:index:b59e1b8b-865d-52af-8653-6ab9e6e11157
Tartarogryllus tartarus tartarus (Saussure, 1874)	subspecies	1122667	Tartarogryllus tartarus	(Saussure, 1874)	accepted	urn:lsid:faunaeur.org:taxname:402984		unbiased infra rank	As nominal subspecies in OSF
Tessellana carinata (Berland & Chopard, 1922)	species	1142698	Tessellana carinata	(Berland & Chopard, 1922)	accepted	urn:lsid:faunaeur.org:taxname:454482		exact
Tessellana lagrecai Messina, 1979	species	1142699	Tessellana lagrecai	Messina, 1979	accepted	urn:lsid:faunaeur.org:taxname:403590		exact			1264996	urn:lsid:globalnames.org:index:da209b5a-bcdc-5908-b09a-277010ac7c4b
Tessellana nigrosignata (Costa, 1863)	species	1142697	Tessellana nigrosignata	(Costa, 1863)	accepted	urn:lsid:faunaeur.org:taxname:403591		exact
Tessellana orina (Burr, 1899)	species	1142700	Tessellana orina	(Burr, 1899)	accepted	urn:lsid:faunaeur.org:taxname:403592		exact
Tessellana tessellata tessellata (Charpentier, 1825)	subspecies	1142694	Tessellana tessellata	(Charpentier, 1825)	accepted	urn:lsid:faunaeur.org:taxname:403594		unbiased infra rank	As nominal subspecies in OSF
Tessellana veyseli (Koçak, 1984)	species	1142701	Tessellana veyseli	(Koçak, 1984)	accepted	urn:lsid:faunaeur.org:taxname:403595		exact
Tetrix bipunctata (Linnaeus, 1758)	species	1102497	Tetrix bipunctata	(Linnaeus, 1758)	accepted	urn:lsid:faunaeur.org:taxname:402277		exact
Tetrix kraussi Saulcy, 1888	species	1102631	Tetrix bipunctata	Saulcy, 1888	is subjective synonym of	urn:lsid:faunaeur.org:taxname:402278		exact
Tetrix bolivari Saulcy, 1901	species	1102512	Tetrix bolivari	Saulcy, 1901	accepted	urn:lsid:faunaeur.org:taxname:402279		exact			1270531	urn:lsid:globalnames.org:index:268caae6-2e6a-544b-816c-07ab3dfe779a
Tetrix ceperoi ceperoi (Bolívar, 1887)	subspecies	1102604	Tetrix ceperoi	Bolivar, 1887	accepted	urn:lsid:faunaeur.org:taxname:402280		unbiased infra rank	As nominal subspecies in OSF
Tetrix fuliginosa (Zetterstedt, 1828)	species	1102526	Tetrix fuliginosa	(Zetterstedt, 1828)	accepted	urn:lsid:faunaeur.org:taxname:402281		exact
Tetrix subulata (Linnaeus, 1758)	species	1102541	Tetrix subulata	(Linnaeus, 1758)	accepted	urn:lsid:faunaeur.org:taxname:402282		exact
Tetrix nutans Hagenbach, 1822	synonym species	1102566	Tetrix tenuicornis	Hagenbach, 1822	is subjective synonym of	urn:lsid:faunaeur.org:taxname:402284	urn:lsid:faunaeur.org:taxname:402283	exact
Tetrix tenuicornoides Wang, Yuan & Ren, 2006	species	1102706	Tetrix tenuicornis	(Sahlberg, 1893)	accepted	urn:lsid:faunaeur.org:taxname:402283		near	Misspelling species name & authorship correction?
Tetrix tuerki (Krauss, 1876)	species	1102625	Tetrix tuerki	Krauss, 1876	accepted	urn:lsid:faunaeur.org:taxname:402285		exact
Tetrix (Macedotetrix) gradojevici Karaman, 1960	synonym subspecies	1102627	Tetrix tuerki	Karaman, 1960	is subjective synonym of	urn:lsid:faunaeur.org:taxname:402286	urn:lsid:faunaeur.org:taxname:402285	exact
Tetrix austriaca Schmidt & Devkota, 1989	synonym species	1102542	Tetrix undulata	Schmidt & Devkota, 1989	is subjective synonym of	urn:lsid:faunaeur.org:taxname:402288	urn:lsid:faunaeur.org:taxname:402287	exact
Tettigonia cantans (Fuessly, 1775)	species	1142803	Tettigonia cantans	(Fuessli, 1775)	accepted	urn:lsid:faunaeur.org:taxname:403647		exact
Tettigonia caudata caudata (Charpentier, 1842)	subspecies	1142777	Tettigonia caudata	(Charpentier, 1845)	accepted	urn:lsid:faunaeur.org:taxname:403648		unbiased infra rank	As nominal subspecies in OSF
Tettigonia hispanica (Bolívar, 1893)	species	1142787	Tettigonia hispanica	(Bolivar, 1893)	accepted	urn:lsid:faunaeur.org:taxname:403649		exact
Tettigonia longispina Ingrisch, 1983	species	1142790	Tettigonia longispina	Ingrisch, 1983	accepted	urn:lsid:faunaeur.org:taxname:403650		exact			1264754	urn:lsid:globalnames.org:index:55af6823-6bd7-5893-aeda-d92b232ef4dd
Tettigonia silana Capra, 1936	species	1142788	Tettigonia silana	Capra, 1936	accepted	urn:lsid:faunaeur.org:taxname:403651		exact			1264751	urn:lsid:globalnames.org:index:840990dd-01c2-5c56-8707-d29d1d76223c
Tettigonia viridissima (Linnaeus, 1758)	species	1142807	Tettigonia viridissima	(Linnaeus, 1758)	accepted	urn:lsid:faunaeur.org:taxname:403652		exact			16980381	urn:lsid:globalnames.org:index:ebfb3a70-c4fd-5b9d-8ff8-aaa45e9ceaad
Thalpomena algeriana algeriana (Lucas, 1849)	subspecies	1103666	Thalpomena algeriana	(Lucas, 1849)	accepted	urn:lsid:faunaeur.org:taxname:402317		unbiased infra rank	As nominal subspecies in OSF
Heteracris pterosticha (Fischer von Waldheim, 1833)	species	1113781	Thisoicetrinus pterostichus	(Fischer de Waldheim, 1833)	accepted	urn:lsid:faunaeur.org:taxname:402633		near	Genus name correction
Thyreonotus bidens (Bolívar, 1887)	species	1142826	Thyreonotus bidens	(Bolivar, 1887)	accepted	urn:lsid:faunaeur.org:taxname:403654		exact
Trigonidium (Trigonidium) cicindeloides Rambur, 1838	species	1127295	Trigonidium cicindeloides	Rambur, 1839	accepted	urn:lsid:faunaeur.org:taxname:402917		exact			933956	urn:lsid:globalnames.org:index:b81d7d44-8ac3-5e65-b124-80767fdacda5
Troglophilus (Troglophilus) andreinii andreinii Capra, 1927	subspecies	1130484	Troglophilus andreinii	Capra, 1927	accepted	urn:lsid:faunaeur.org:taxname:402850		near	Subgenus name correction. As nominal subspecies in OSF		616991	urn:lsid:globalnames.org:index:cae33fa5-6c87-5e04-97b2-94aef341ab4f
Troglophilus (Troglophilus) brevicauda Chopard, 1934	species	1130474	Troglophilus brevicauda	Chopard, 1934	accepted	urn:lsid:faunaeur.org:taxname:402851		exact			941585	urn:lsid:globalnames.org:index:196d4d18-3c19-5b35-ac85-adf505a4d6e6
Troglophilus (Troglophilus) cavicola (Kollar, 1833)	species	1130476	Troglophilus cavicola	(Kollar, 1833)	accepted	urn:lsid:faunaeur.org:taxname:402853		exact
Troglophilus (Troglophilus) lagoi Mennozi, 1934	species	1130482	Troglophilus lagoi	Menozzi, 1934	accepted	urn:lsid:faunaeur.org:taxname:402854		exact			18328768	urn:lsid:globalnames.org:index:a4be2199-9680-5cb2-940e-0e86385fdedb
Troglophilus (Troglophilus) lazaropolensis Karaman, 1958	species	1130491	Troglophilus lazaropolensis	Karaman, 1958	accepted	urn:lsid:faunaeur.org:taxname:402855		exact
Troglophilus (Troglophilus) marinae Rampini & Di Russo, 2003	species	1130488	Troglophilus marinae	Rampini & di Russo, 2003	accepted	urn:lsid:faunaeur.org:taxname:402856		exact
Troglophilus (Paratroglophilus) neglectus Krauss, 1879	species	1130500	Troglophilus neglectus	Krauss, 1879	accepted	urn:lsid:faunaeur.org:taxname:402857		exact			616988	urn:lsid:globalnames.org:index:82065437-b087-51ab-a012-ee1d48a2f109
Troglophilus (Paratroglophilus) ovuliformis Karny, 1907	species	1130498	Troglophilus ovuliformis	Karny, 1907	accepted	urn:lsid:faunaeur.org:taxname:402858		exact			941590	urn:lsid:globalnames.org:index:59031ec8-f3d9-5551-a829-4474750176c1
Troglophilus (Troglophilus) pretneri Us, 1970	synonym species	1130499	Troglophilus ovuliformis	Us, 1970	is subjective synonym of	urn:lsid:faunaeur.org:taxname:454476	urn:lsid:faunaeur.org:taxname:402858	exact
Troglophilus (Troglophilus) spinulosus Chopard, 1921	species	1130470	Troglophilus spinulosus	Chopard, 1921	accepted	urn:lsid:faunaeur.org:taxname:402860		exact			941583	urn:lsid:globalnames.org:index:6e47d9a1-5935-56f6-a6e6-751e77d6f3fe
Troglophilus (Dayscelus) roeweri Werner, 1927	synonym species	1130469	Troglophilus spinulosus	Werner, 1927	is subjective synonym of	urn:lsid:faunaeur.org:taxname:402862	urn:lsid:faunaeur.org:taxname:402860	exact
Troglophilus petrochilosi Boudou-Saltet, 1978	synonym species	1130471	Troglophilus spinulosus	Boudou-Saltet, 1978	is subjective synonym of	urn:lsid:faunaeur.org:taxname:402861	urn:lsid:faunaeur.org:taxname:402860	exact
Troglophilus (Troglophilus) zorae Karaman & Pavicevic, 2011	species	1130492	Troglophilus zorae	Karaman & Pavicevic, 2011	accepted	urn:lsid:faunaeur.org:taxname:454478		exact
Tropidopola cylindrica	synonym species	1103019	Tropidopola cylindrica	(Marschall, 1836)	accepted	urn:lsid:faunaeur.org:taxname:402306		exact
Tropidopola graeca graeca Uvarov, 1926	subspecies	1103031	Tropidopola graeca	Uvarov, 1926	accepted	urn:lsid:faunaeur.org:taxname:402307		unbiased infra rank	As nominal subspecies in OSF		667425	urn:lsid:globalnames.org:index:69586851-c566-5f1c-aec5-4e4b9921f1cb
Tropidopola longicornis (Fieber, 1853)	species	1103016	Tropidopola longicornis	(Fieber, 1853)	accepted	urn:lsid:faunaeur.org:taxname:402308		exact
Truxalis eximia eximia Eichwald, 1830		1111652	Truxalis eximia	Eichwald, 1830	accepted	urn:lsid:faunaeur.org:taxname:402760		unbiased infra rank	As nominal subspecies in OSF		676156	urn:lsid:globalnames.org:index:272dc8f4-0a01-56e2-8c2a-d504178b7054
Truxalis eximia cypria Dirsh, 1950	subspecies	1111653	Truxalis eximia cypria	Dirsh, 1950	accepted	urn:lsid:faunaeur.org:taxname:402761		exact
Truxalis nasuta (Linnaeus, 1758)	species	1111632	Truxalis nasuta	(Linnaeus, 1758)	accepted	urn:lsid:faunaeur.org:taxname:402759		exact
Turanogryllus lateralis (Fieber, 1853)	species	1123669	Turanogryllus lateralis	(Fieber, 1853)	accepted	urn:lsid:faunaeur.org:taxname:402981		exact
Tylopsis lilifolia (Fabricius, 1793)	species	1139499	Tylopsis lilifolia	(Fabricius, 1793)	accepted	urn:lsid:faunaeur.org:taxname:403378		exact
Uromenus agarenus (Brunner von Wattenwyl, 1882)	species	1132442	Uromenus agarenus	(Brunner von Wattenwyl v.W., 1882)	accepted	urn:lsid:faunaeur.org:taxname:403153		exact
Uromenus annae (Targioni-Tozzetti, 1881)	species	1132429	Uromenus annae	(Targioni-Tozzetti, 1891)	accepted	urn:lsid:faunaeur.org:taxname:403128		exact
Uromenus bonnetti Bolívar, 1907	synonym subspecies	1221339	Uromenus bonneti	Bolivar, 1907	accepted	urn:lsid:faunaeur.org:taxname:403154	urn:lsid:faunaeur.org:taxname:403154	phonetic	Misspelling species name
Uromenus bonneti bonneti Bolívar, 1907	subspecies	1132448	Uromenus bonneti bonneti	Bolivar, 1907	accepted	urn:lsid:faunaeur.org:taxname:403155		unbiased infra rank	As nominal subspecies in OSF
Uromenus bonneti painoi Ramme, 1927	subspecies	1132447	Uromenus bonneti painoi	Ramme, 1927	accepted	urn:lsid:faunaeur.org:taxname:403156		exact			17030929	urn:lsid:globalnames.org:index:b9e5ac51-7e86-5ef9-8430-91ce2b579fd7
Uromenus brevicollis (Fischer, 1853)		1132417	Uromenus brevicollis	(Fischer, 1853)	accepted	urn:lsid:faunaeur.org:taxname:403157		exact
Uromenus dyrrhachiacus (Karny, 1918)	species	1132423	Uromenus dyrrhachiacus	Karny, 1918	accepted	urn:lsid:faunaeur.org:taxname:403136		exact			941771	urn:lsid:globalnames.org:index:9f0e25bc-d142-56e5-8040-4beb6433743b
Uromenus elegans (Fischer, 1853)	species	1132424	Uromenus elegans	(Fischer, 1853)	accepted	urn:lsid:faunaeur.org:taxname:403138		exact
Uromenus maroccanus (Saussure, 1898)	species	1132458	Uromenus maroccanus	Saussure, 1898	accepted	urn:lsid:faunaeur.org:taxname:403158		exact
Uromenus riggioi La Greca, 1964	species	1132466	Uromenus riggioi	La Greca, 1964	accepted	urn:lsid:faunaeur.org:taxname:403159		exact			5765003	urn:lsid:globalnames.org:index:801d56e3-7a34-59fd-8ac3-e4f88b948f7e
Uromenus rugosicollis (Serville, 1838)	species	1132468	Uromenus rugosicollis	(Serville, 1839)	accepted	urn:lsid:faunaeur.org:taxname:403160		exact
Tettix nobrei Bolívar, 1887	synonym species	1102105	Uvarovitettix nodulosus	Bolivar, 1887	is subjective synonym of	urn:lsid:faunaeur.org:taxname:402293	urn:lsid:faunaeur.org:taxname:402292	exact
Tetrix transsylvanica transsylvanica (Bazyluk & Kis, 1960)	subspecies	1218316	Uvarovitettix transsylvanicus	(Bazyluk & Kis, 1960)	accepted	urn:lsid:faunaeur.org:taxname:402294		unbiased infra rank	As nominal subspecies in OSF
Metrioptera (Vichetia) helleri Schmidt, 1998	species	1142269	Vichetia helleri	(Schmidt, 1998)	accepted	urn:lsid:faunaeur.org:taxname:403505		near	Genus name correction
Vichetia oblongicollis (Brunner von Wattenwyl, 1882)	species	1142271	Vichetia oblongicollis	(Brunner von Wattenwyl, 1882)	accepted	urn:lsid:faunaeur.org:taxname:403510		exact
Sphingonotus (Sphingonotus) guanchus (Johnsen, 1985)	species	1103797	Wernerella guancha	Johnsen, 1985	accepted	urn:lsid:faunaeur.org:taxname:402311		near	Genus name correction		808696	urn:lsid:globalnames.org:index:81a7443c-d034-5c76-b3f5-219312b943f7
Sphingonotus (Neosphingonotus) pachecoi (Bolívar, 1908)	species	1103946	Wernerella pachecoi	(Bolivar, 1908)	accepted	urn:lsid:faunaeur.org:taxname:402312		near	Genus name correction		6914283	urn:lsid:globalnames.org:index:419317ee-3dda-5dcc-b6ee-83383c47f6d6
Sphingonotus (Sphingonotus) picteti (Krauss, 1892)	species	1103799	Wernerella picteti	(Krauss, 1892)	accepted	urn:lsid:faunaeur.org:taxname:402314		near	Genus name correction		6914284	urn:lsid:globalnames.org:index:36bb7d66-7033-5c19-8366-2a5921284974
Sphingonotus (Sphingonotus) rugosus (Bland & Gangwere, 1998)	species	1103917	Wernerella rugosa	Bland & Gangwere, 1998	accepted	urn:lsid:faunaeur.org:taxname:402315		near	Genus name correction
Xerohippus azami (Bolívar, 1901)	species	1105685	Xerohippus azami	(Bolivar, 1901)	accepted	urn:lsid:faunaeur.org:taxname:402423		exact
Xerohippus cyprius Uvarov, 1942	species	1105686	Xerohippus cyprius	Uvarov, 1942	accepted	urn:lsid:faunaeur.org:taxname:402424		exact			809736	urn:lsid:globalnames.org:index:6380cfd7-8bd9-5a89-9b8d-b687ce869acc
Xerohippus occidentalis Pascual & Aguirre Segura, 1996	species	1105692	Xerohippus occidentalis	Pascual & Aguirre, 1996	accepted	urn:lsid:faunaeur.org:taxname:402428		exact
Xerohippus sinuosus Uvarov, 1942	species	1105689	Xerohippus sinuosus	Uvarov, 1942	accepted	urn:lsid:faunaeur.org:taxname:402425		exact			809740	urn:lsid:globalnames.org:index:70abcdab-ef03-5815-8743-51e29cbf2b05
Xerohippus solerii (Jannone, 1936)	species	1105690	Xerohippus solerii	(Jannone, 1936)	accepted	urn:lsid:faunaeur.org:taxname:402427		exact
Xya iberica Günther, 1990	species	1100355	Xya iberica	Günther, 1990	accepted	urn:lsid:faunaeur.org:taxname:402301		exact
Xya pfaendleri Harz, 1970	species	1100379	Xya pfaendleri	(Harz, 1970)	accepted	urn:lsid:faunaeur.org:taxname:402302		exact			621795	urn:lsid:globalnames.org:index:e70679e8-a75e-5bac-8c33-2edb4ba0c303
Xya variegata (Latreille, 1809)	species	1100377	Xya variegata	Latreille, 1809	accepted	urn:lsid:faunaeur.org:taxname:402303		exact			6748548	urn:lsid:globalnames.org:index:0234a85c-37eb-5291-b6f1-5a9782a3e7f7
Yersinella beybienkoi La Greca, 1974	species	1142433	Yersinella beybienkoi	La Greca, 1974	accepted	urn:lsid:faunaeur.org:taxname:403657		exact			1264585	urn:lsid:globalnames.org:index:a1b28f00-a1bb-5a0d-90ef-af116e7ab8b4
Yersinella raymondii (Yersin, 1860)	species	1142434	Yersinella raymondii	(Yersin, 1860)	accepted	urn:lsid:faunaeur.org:taxname:403658		exact
Zeuneriana abbreviata (Serville, 1838)	species	1142476	Zeuneriana abbreviata	(Serville, 1839)	accepted	urn:lsid:faunaeur.org:taxname:403516		exact
Zeuneriana amplipennis (Brunner von Wattenwyl, 1882)	species	1142479	Zeuneriana amplipennis	(Brunner von Wattenwyl, 1882)	accepted	urn:lsid:faunaeur.org:taxname:403517		exact
Zeuneriana burriana (Uvarov, 1935)	species	1142480	Zeuneriana burriana	(Uvarov, 1935)	accepted	urn:lsid:faunaeur.org:taxname:403518		exact
Zeuneriana marmorata (Fieber, 1853)	species	1142481	Zeuneriana marmorata	(Fieber, 1853)	accepted	urn:lsid:faunaeur.org:taxname:403519		exact
Eozubovskya banatica (Kis, 1965)	species	1117998	Zubovskya banatica	Kis, 1965	accepted	urn:lsid:faunaeur.org:taxname:402659		near	Genus name correction		937959	urn:lsid:globalnames.org:index:68097d6d-ec14-5305-afe7-fb0291683060

## Sheet:  Embioptera Species File
Scientificname Embioptera Species File	Status in ESF	TaxonNameID ESF	Valid Name Fauna Europaea	Authority in Fauna Europaea	Status in Fauna Europaea	GUID Fauna Europaea	Match Type	Validation comment		Global Names Index ID	Global Names Index (GNI) LSID
Cleomia guareschii Stefani, 1953	species	1171992	Cleomia guareschi	Stefani, 1953	accepted	urn:lsid:faunaeur.org:taxname:337286	phonetic	Authorship correction		5488678	urn:lsid:globalnames.org:index:98868c67-19e3-5eca-8d21-3ac2ff0e5fad
Dactylocerca ferruginea Ross, 2003	species	1171888	Embia amadorae	Ross, 1966	accepted	urn:lsid:faunaeur.org:taxname:337277	exact
Embia amadorae Ross, 1966	species	1172021	Embia amadorae	Ross, 1966	accepted	urn:lsid:faunaeur.org:taxname:337277	exact			5488715	urn:lsid:globalnames.org:index:6f068c2e-f5ad-5b56-bcec-30690fdae4db
Embia cynthiae Fontana, 2002	species	1217766	Embia cynthiae	Fontana, 2002	accepted	urn:lsid:faunaeur.org:taxname:337278	exact			17216354	urn:lsid:globalnames.org:index:f818f5a3-7003-5b42-b453-47143af6caa4
Embia fuentei Navás, 1918	species	1172022	Embia fuentei	Navás, 1918	accepted	urn:lsid:faunaeur.org:taxname:337279	exact
Embia girolamii Fontana, 2001	species	1172030	Embia girolamii	Fontana, 2001	accepted	urn:lsid:faunaeur.org:taxname:337280	exact			17192254	urn:lsid:globalnames.org:index:8ca3c3e6-46fa-5c73-b371-fab59d988878
Embia nuragica Stefani, 1953	species	1172020	Embia nuragica	Stefani, 1953	accepted	urn:lsid:faunaeur.org:taxname:337281	exact			5488784	urn:lsid:globalnames.org:index:2b983840-4540-5ab3-9c5a-0f30dceab008
Embia ramburi Rimsky-Korsakow, 1905	species	1172018	Embia ramburi	Rimski-Korsakow, 1905	accepted	urn:lsid:faunaeur.org:taxname:337282	exact
Embia savignii Westwood, 1837	species	1172038	Embia savignyi	Westwood, 1837	accepted	urn:lsid:faunaeur.org:taxname:337283	phonetic	Authorship correction		5488810	urn:lsid:globalnames.org:index:be340391-c234-5ab7-8cd5-63b1370ce8d9
Embia tyrrhenica Stefani, 1953	species	1172017	Embia tyrrhenica	Stefani, 1953	accepted	urn:lsid:faunaeur.org:taxname:337284	exact			5488831	urn:lsid:globalnames.org:index:9e8dc81e-fdf5-563f-a6aa-63ce4eee7532
Haploembia palaui Stefani, 1955	species	1217768	Haploembia palaui	Stefani, 1955	accepted	urn:lsid:faunaeur.org:taxname:337292	exact			5489009	urn:lsid:globalnames.org:index:177d7645-db8f-5fa0-bd22-c504959d473d
Haploembia solieri (Rambur, 1842)	species	1172289	Haploembia solieri	(Rambur, 1842)	accepted	urn:lsid:faunaeur.org:taxname:337291	exact			5489010	urn:lsid:globalnames.org:index:7cbc7a65-59b7-5f16-af0c-328be8417aa9
Oligotoma nigra Hagen, 1885	species	1172226	Oligotoma nigra	(Hagen, 1866)	accepted	urn:lsid:faunaeur.org:taxname:337288	exact			5489064	urn:lsid:globalnames.org:index:78a96e1d-289a-5f3b-98ba-6657c1de7247
Oligotoma saundersii (Westwood, 1837)	species	1172256	Oligotoma saundersii	(Westwood, 1837)	accepted	urn:lsid:faunaeur.org:taxname:337289	exact			5489069	urn:lsid:globalnames.org:index:bf6f1e7b-d7b5-5c17-9121-b233a6939cd8

## Sheet: Phasmida Species File
Scientificname Phasmida Species File	Status in PSF	TaxonNameID PSF	Valid Name Fauna Europaea	Authority in Fauna Europaea	Status in Fauna Europaea	GUID Fauna Europaea	Match Type	Validation comment		Global Names Index ID	Global Names Index (GNI) LSID
Agrostia bipunctata Redtenbacher, 1906	species	1199642	Acanthoxyla geisovii	(Kaup, 1866)	accepted	urn:lsid:faunaeur.org:taxname:337255	exact			1602213	urn:lsid:globalnames.org:index:441024e2-6941-528a-96d6-4829ba5d0bcf
Acanthoxyla geisovii (Kaup, 1866)	species	1201266	Acanthoxyla geisovii	(Kaup, 1866)	accepted	urn:lsid:faunaeur.org:taxname:337255	exact
Acanthoxyla prasina (Westwood, 1859)	species	1201270					no match	New for UK
Bacteria cubaensis (Haan, 1842)	species	1202178	Acanthoxyla geisovii	(Kaup, 1866)	accepted	urn:lsid:faunaeur.org:taxname:337255	exact
Acanthoxyla inermis Salmon, 1955	species	1201268	Acanthoxyla inermis	Salmon, 1955	accepted	urn:lsid:faunaeur.org:taxname:337256	exact
Alienobostra amplectens (Redtenbacher, 1908)	species	1202149	Acanthoxyla inermis	Salmon, 1955	accepted	urn:lsid:faunaeur.org:taxname:337256	exact
Bacteria cyphus Westwood, 1859	synonym species	1202407	Acanthoxyla inermis	Salmon, 1955	accepted	urn:lsid:faunaeur.org:taxname:337256	exact			1601421	urn:lsid:globalnames.org:index:47e84a37-9eaf-5530-8e37-572547bc1d8c
Bacillus atticus atticus Brunner von Wattenwyl, 1882	subspecies	1200076	Bacillus atticus	Brunner von Wattenwyl, 1882	accepted	urn:lsid:faunaeur.org:taxname:337238	unbiased infra rank	As nominal subspecies in PSF		1941510	urn:lsid:globalnames.org:index:1e53730d-b6ec-539a-9843-c2f75c842e32
Bacillus grandii grandii Nascetti & Bullini, 1981	subspecies	1200085	Bacillus grandii	Nascetti & Bullini, 1982	accepted	urn:lsid:faunaeur.org:taxname:337240	unbiased infra rank	As nominal subspecies in PSF
Bacillus lynceorum Bullini, Nascetti & Bullini, 1984	species	1200101	Bacillus lynceorum	Bullini, Nascetti & Bianchi Bullini, 1984	accepted	urn:lsid:faunaeur.org:taxname:337241	exact
Bacillus rossius rossius (Rossi, 1790)	subspecies	1200089	Bacillus rossius	(Rossius, 1790)	accepted	urn:lsid:faunaeur.org:taxname:337242	unbiased infra rank	As nominal subspecies in PSF
Bacillus rossius tripolitanus (Haan, 1842)	subspecies	1200098	Bacillus tripolitanus	(De Haan, 1842)	accepted	urn:lsid:faunaeur.org:taxname:337243	near	As subspecies in PSF
Bacillus whitei Nascetti & Bullini, 1981	species	1200102	Bacillus whitei	Nascetti & Bullini, 1982	accepted	urn:lsid:faunaeur.org:taxname:337244	exact
Carausius morosus (Sinéty, 1901)	species	1200568	Carausius morosus	(De Sinéty, 1901)	accepted	urn:lsid:faunaeur.org:taxname:454485	exact
Clitarchus hookeri (White, 1846)	species	1201286	Clitarchus hookeri	(White, 1846)	accepted	urn:lsid:faunaeur.org:taxname:337258	exact
Clonaria libanica (Uvarov, 1924)	species	1203675					no match	New for Turkey
Clonopsis gallica (Charpentier, 1825)	species	1200105	Clonopsis gallica	(Charpentier, 1825)	accepted	urn:lsid:faunaeur.org:taxname:337246	exact
Leptynia annaepaulae Scali, Milani & Passamonti, 2012	species	1218097	Leptynia annaepaulae	Scali, Milani & Passamonti, 2012	accepted	urn:lsid:faunaeur.org:taxname:454511	exact
Leptynia attenuata attenuata Pantel, 1890	subspecies	1218098	Leptynia attenuata	Pantel, 1890	accepted	urn:lsid:faunaeur.org:taxname:337248	unbiased infra rank	As nominal subspecies in PSF
Leptynia caprai Scali, 1996	species	1203563	Leptynia caprai	Scali, 1996	accepted	urn:lsid:faunaeur.org:taxname:337249	exact			1604152	urn:lsid:globalnames.org:index:b2cf4925-2ddf-5fb4-9183-8f91b31491fb
Leptynia montana Scali, 1996	species	1203564	Leptynia montana	Scali, 1996	accepted	urn:lsid:faunaeur.org:taxname:337251	exact			1604139	urn:lsid:globalnames.org:index:26253111-fe37-58a3-96e6-9dcf485c9ef9
Pijnackeria barbarae Scali, Milani & Passamonti, 2013	species	1216727					no match	New for Spain
Pijnackeria hispanica (Bolívar, 1878)	species	1203770	Pijnackeria hispanica	(Bolivar, 1878)	accepted	urn:lsid:faunaeur.org:taxname:337250	exact
Pijnackeria lelongi Scali, Milani & Passamonti, 2013	species	1216728					no match	New for Spain
Pijnackeria lucianae Scali, Milani & Passamonti, 2013	species	1216726					no match	New for Spain
Pijnackeria masettii Scali, Milani & Passamonti, 2013	species	1216731					no match	New for France & Spain
Pijnackeria originis Scali, Milani & Passamonti, 2013	species	1216730					no match	New for Spain
Pijnackeria recondita Valero & Ortiz, 2015	species	1224628					no match	New for Spain
Sceptrophasma bituberculatum (Redtenbacher, 1889)	species	1203584	Ramulus bituberculata	(Redtenbacher, 1889)	accepted	urn:lsid:faunaeur.org:taxname:337253	near	Correct genus name

## Sheet: Dermaptera Species File
Scientificname Dermaptera Species File	Status in DSF	TaxonNameID DSF	Valid Name Fauna Europaea	Authority in Fauna Europaea	Status in Fauna Europaea	GUID Fauna Europaea	GUID Fauna Europaea valid name	Match Type	Validation comment		Global Names Index ID	Global Names Index (GNI) LSID
Aborolabis cerrobarjai Steinmann, 1979	species	1181655	Aborolabis cerrobarjai	Steinmann, 1979	accepted	urn:lsid:faunaeur.org:taxname:347866		exact			19193035	urn:lsid:globalnames.org:index:de0bded8-dadf-5858-acdc-6aba344db697
Aborolabis mauritanica (Lucas, 1849)	species	1180856	Aborolabis mauritanica	(Lucas, 1846)	accepted	urn:lsid:faunaeur.org:taxname:347867		exact
Aborolabis mordax Steinmann, 1978	species	1180195	Aborolabis mordax	Steinmann, 1978	accepted	urn:lsid:faunaeur.org:taxname:347868		exact			19163333	urn:lsid:globalnames.org:index:d23f8ba1-bc00-57ea-b92e-f59bc2fdc5b8
Anechura bipunctata (Fabricius, 1781)	species	1179902	Anechura bipunctata	(Fabricius, 1781)	accepted	urn:lsid:faunaeur.org:taxname:347973		exact
Chelidura anthracina Kolenati, 1846	synonym species	1179395	Anechura bipunctata	Kolenati, 1846	is subjective synonym of	urn:lsid:faunaeur.org:taxname:347975	urn:lsid:faunaeur.org:taxname:347973	exact
Forficula biguttata Fabricius, 1781	synonym species	1179903	Anechura bipunctata	Fabricius, 1794	is subjective synonym of	urn:lsid:faunaeur.org:taxname:347974	urn:lsid:faunaeur.org:taxname:347973	exact
Forficula fabricii Fieber, 1853	synonym species	1179977	Anechura bipunctata	Fieber, 1854	is subjective synonym of	urn:lsid:faunaeur.org:taxname:347976	urn:lsid:faunaeur.org:taxname:347973	exact
Anechura lewisi (Burr, 1904)	species	1181192	Anechura lewisi	(Burr, 1904)	accepted	urn:lsid:faunaeur.org:taxname:347979		exact
Anisolabis alata Johnsen, 1974	species	1180380	Anisolabis alata	(Johnsen, 1974)	accepted	urn:lsid:faunaeur.org:taxname:347856		exact			6369698	urn:lsid:globalnames.org:index:26acab26-5deb-5beb-a88f-4236f0160366
Labidura advena Meinert, 1868	synonym species	1179387	Anisolabis maritima	Meinert, 1863	is subjective synonym of	urn:lsid:faunaeur.org:taxname:347859	urn:lsid:faunaeur.org:taxname:347857	exact
Labidurodes singularis Shiraki, 1905	synonym species	1180173	Anisolabis maritima	Shiraki, 1905	is subjective synonym of	urn:lsid:faunaeur.org:taxname:347861	urn:lsid:faunaeur.org:taxname:347857	exact
Anisolabis addita Burr, 1913	synonym species	1181876	Anisolabis maritima	Burr, 1913	is subjective synonym of	urn:lsid:faunaeur.org:taxname:347862	urn:lsid:faunaeur.org:taxname:347857	exact
Anisolabis quadrata Liu, 1946	synonym species	1182016	Anisolabis maritima	Liu, 1946	is subjective synonym of	urn:lsid:faunaeur.org:taxname:347863	urn:lsid:faunaeur.org:taxname:347857	exact
Anisolabis pectoralis (Eschscholz, 1822)	species	1179632	Anisolabis pectoralis	(Eschscholtz, 1822)	accepted	urn:lsid:faunaeur.org:taxname:347864		exact
Apterygida media (Hagenbach, 1822)	species	1182115	Apterygida media	(Hagenbach, 1822)	accepted	urn:lsid:faunaeur.org:taxname:347933		exact
Forficula freyi Dohrn, 1859	synonym species	1179398	Apterygida media	Dohrn, 1859	is subjective synonym of	urn:lsid:faunaeur.org:taxname:347937	urn:lsid:faunaeur.org:taxname:347933	exact
Forficula curta Fischer von Waldheim, 1846	synonym species	1179981	Apterygida media	Fischer, 1846	is subjective synonym of	urn:lsid:faunaeur.org:taxname:347936	urn:lsid:faunaeur.org:taxname:347933	exact
Chelidura acanthopygia (Géné, 1832)	species	1179985	Chelidura acanthopygia	(Gene, 1832)	accepted	urn:lsid:faunaeur.org:taxname:347950		exact
Forficula xanthopygia Schmidt, 1866	synonym species	1182103	Chelidura acanthopygia	Schmidt, 1866	is subjective synonym of	urn:lsid:faunaeur.org:taxname:347951	urn:lsid:faunaeur.org:taxname:347950	exact
Chelidura apfelbecki Werner, 1907	species	1180814	Chelidura apfelbecki	Werner, 1907	accepted	urn:lsid:faunaeur.org:taxname:347952		exact			6812408	urn:lsid:globalnames.org:index:c97e6105-e664-57b1-a4e3-bb18334b2b95
Chelidura reiseri Werner, 1907	synonym species	1180815	Chelidura apfelbecki	Werner, 1907	is subjective synonym of	urn:lsid:faunaeur.org:taxname:347953	urn:lsid:faunaeur.org:taxname:347952	exact			6812408	urn:lsid:globalnames.org:index:c97e6105-e664-57b1-a4e3-bb18334b2b95
Chelidura aptera (Megerle, 1825)	species	1182105	Chelidura aptera	(Megerle, 1825)	accepted	urn:lsid:faunaeur.org:taxname:347954		exact
Forficula paupercula Géné, 1832	synonym species	1179983	Chelidura aptera	Gene, 1832	is subjective synonym of	urn:lsid:faunaeur.org:taxname:347959	urn:lsid:faunaeur.org:taxname:347954	exact
Forficula montana Géné, 1832	synonym species	1179984	Chelidura aptera	Gene, 1832	is subjective synonym of	urn:lsid:faunaeur.org:taxname:347958	urn:lsid:faunaeur.org:taxname:347954	exact
Forficula alpina Bonelli, 1832	synonym species	1182149	Chelidura aptera	Borelli, 1832	is subjective synonym of	urn:lsid:faunaeur.org:taxname:347957	urn:lsid:faunaeur.org:taxname:347954	exact
Chelidura bolivari Dubrony, 1878	species	1180115	Chelidura bolivari	Dubrony, 1878	accepted	urn:lsid:faunaeur.org:taxname:347960		exact
			Chelidura caprai	(Taglianti, 1993)	accepted	urn:lsid:faunaeur.org:taxname:347961		no match	Gap
Chelidura chelmosensis (Maran, 1965)	species	1179602	Chelidura chelmosensis	(Maran, 1965)	accepted	urn:lsid:faunaeur.org:taxname:347963		exact
Chelidura euxina Bey-Bienko, 1936	synonym species	1180951	Chelidura euxina	(Semenov, 1907)	accepted	urn:lsid:faunaeur.org:taxname:347964		exact
Chelidura euxina (Semenov, 1907)	species	1182141	Chelidura euxina	(Semenov, 1907)	accepted	urn:lsid:faunaeur.org:taxname:347964		exact
			Chelidura guentheri	(Galvagni, 1994)	accepted	urn:lsid:faunaeur.org:taxname:347965		no match	Gap
Chelidura mutica Krauss, 1886	species	1180459	Chelidura mutica	Krauss, 1886	accepted	urn:lsid:faunaeur.org:taxname:347966		exact
			Chelidura poggii	(Capra, 1982)	accepted	urn:lsid:faunaeur.org:taxname:347967		no match	Gap
Chelidura pyrenaica (Bonelli, 1832)	species	1182150	Chelidura pyrenaica	(Bonelli, 1832)	accepted	urn:lsid:faunaeur.org:taxname:347968		exact
Chelidura specifica Steinmann, 1989	species	1181736	Chelidura specifica	Steinmann, 1989	accepted	urn:lsid:faunaeur.org:taxname:347970		exact			16915352	urn:lsid:globalnames.org:index:0bb360a5-e818-599a-abb9-59995e8bdb59
			Chelidura thaleri	(Harz, 1980)	accepted	urn:lsid:faunaeur.org:taxname:347971		no match	Gap
Chelidura transsilvanica Ebner, 1932	species	1180206	Chelidura transsilvanica	(Ebner, 1932)	accepted	urn:lsid:faunaeur.org:taxname:347972		exact
Euborellia annulipes (Lucas, 1847)	species	1179759	Euborellia annulipes	(Dohrn, 1864)	accepted	urn:lsid:faunaeur.org:taxname:347843		exact
Anisolabis antennata Kirby, 1891	synonym species	1180746	Euborellia annulipes	Kirby, 1891	is subjective synonym of	urn:lsid:faunaeur.org:taxname:347846	urn:lsid:faunaeur.org:taxname:347843	exact
Anisolabis bormansi Scudder, 1893	synonym species	1179530	Euborellia annulipes	Scudder, 1893	is subjective synonym of	urn:lsid:faunaeur.org:taxname:347847	urn:lsid:faunaeur.org:taxname:347843	exact
Anisolabis fallax Bey-Bienko, 1959	synonym species	1180542	Euborellia annulipes	Shiraki, 1906	is subjective synonym of	urn:lsid:faunaeur.org:taxname:347848	urn:lsid:faunaeur.org:taxname:347843	exact
Anisolabis tripolitana Werner, 1908	synonym species	1180690	Euborellia annulipes	Werner, 1908	is subjective synonym of	urn:lsid:faunaeur.org:taxname:347850	urn:lsid:faunaeur.org:taxname:347843	exact
Euborellia fulviceps Borelli, 1921	species	1180016	Euborellia hispanica	Steinmann, 1981	accepted	urn:lsid:faunaeur.org:taxname:347853		exact			16715591	urn:lsid:globalnames.org:index:27f2f6f6-b13d-5443-a96c-e76eb3f3a5bc
Euborellia moesta (Géné, 1837)	species	1180117	Euborellia moesta	(Gene, 1839)	accepted	urn:lsid:faunaeur.org:taxname:347854		exact
Eulithinus analis (Rambur, 1838)	species	1179377	Eulithinus analis	(Rambur, 1838)	accepted	urn:lsid:faunaeur.org:taxname:347982		exact
Eulithinus montanus (Steinmann, 1981)	species	1180455	Eulithinus montanus	(Steinmann, 1981)	accepted	urn:lsid:faunaeur.org:taxname:347983		exact
Eulithinus hispanicus Steinmann, 1984	synonym species	1180009	Eulithinus montanus	Steinmann, 1984	is subjective synonym of	urn:lsid:faunaeur.org:taxname:347984	urn:lsid:faunaeur.org:taxname:347983	exact
Forficula abrutiana Borelli, 1916	species	1179704	Forficula abrutiana	Borelli, 1916	accepted	urn:lsid:faunaeur.org:taxname:347893		exact			5765141	urn:lsid:globalnames.org:index:c7101a31-c391-57a6-bd04-587216861c33
Forficula aetolica Brunner von Wattenwyl, 1882	species	1180303	Forficula aetolica	Brunner, 1882	accepted	urn:lsid:faunaeur.org:taxname:347894		exact
Forficula apennina Costa, 1881	species	1179598	Forficula apennina	Costa, 1881	accepted	urn:lsid:faunaeur.org:taxname:347895		exact
Forficula aptera Schmidt, 1866	synonym species	1182104	Forficula auricularia	Linnaeus, 1758	accepted	urn:lsid:faunaeur.org:taxname:347896		exact			13206972	urn:lsid:globalnames.org:index:8a4d2fdd-f99d-5bec-a6c7-eecb67ae29af
Forficula parallela Fabricius, 1775	synonym species	1179895	Forficula auricularia	Fabricius, 1775	is subjective synonym of	urn:lsid:faunaeur.org:taxname:347899	urn:lsid:faunaeur.org:taxname:347896	exact
Forficula forcipata Stephens, 1835	synonym species	1180113	Forficula auricularia	Stephens, 1835	is subjective synonym of	urn:lsid:faunaeur.org:taxname:347905	urn:lsid:faunaeur.org:taxname:347896	exact
Forficula caucasica Bey-Bienko, 1926	synonym species	1180475	Forficula auricularia	Kolenati, 1846	is subjective synonym of	urn:lsid:faunaeur.org:taxname:347906	urn:lsid:faunaeur.org:taxname:347896	exact
Forficula infumata Megerle, 1825	synonym species	1182106	Forficula auricularia	Megerla, 1825	is subjective synonym of	urn:lsid:faunaeur.org:taxname:347903	urn:lsid:faunaeur.org:taxname:347896	exact
Forficula borealis Leach, 1835	synonym species	1182117	Forficula auricularia	Leach, 1835	is subjective synonym of	urn:lsid:faunaeur.org:taxname:347904	urn:lsid:faunaeur.org:taxname:347896	exact
Forficula neglecta Marsham, 1802	synonym species	1182118	Forficula auricularia	Marsham, 1802	is subjective synonym of	urn:lsid:faunaeur.org:taxname:347902	urn:lsid:faunaeur.org:taxname:347896	exact
Forficula media Marsham, 1802	synonym species	1182119	Forficula auricularia	Marsham, 1802	is subjective synonym of	urn:lsid:faunaeur.org:taxname:347901	urn:lsid:faunaeur.org:taxname:347896	exact
Forficula parallela Westwood, 1837	synonym species	1179505	Forficula auricularia	Fabricius, 1775	is subjective synonym of	urn:lsid:faunaeur.org:taxname:347899	urn:lsid:faunaeur.org:taxname:347896	exact
Forficula decipiens Géné, 1832	species	1179986	Forficula decipiens	Gene, 1832	accepted	urn:lsid:faunaeur.org:taxname:347907		exact			6921614	urn:lsid:globalnames.org:index:87153fba-a141-5ef1-970a-ec64b60f34f7
Forficula brevis Rambur, 1838	synonym species	1179376	Forficula decipiens	Rambur, 1838	is subjective synonym of	urn:lsid:faunaeur.org:taxname:347909	urn:lsid:faunaeur.org:taxname:347907	exact
Forficula laminigera Costa, 1881	synonym species	1179596	Forficula decipiens	Costa, 1881	is subjective synonym of	urn:lsid:faunaeur.org:taxname:347910	urn:lsid:faunaeur.org:taxname:347907	exact
Forficula iberica Steinmann, 1981	species	1180453	Forficula iberica	Steinmann, 1981	accepted	urn:lsid:faunaeur.org:taxname:347911		exact			16715593	urn:lsid:globalnames.org:index:b16da4a4-610b-53ea-95de-6b7277d08135
Forficula laeviforceps Chopard, 1937	species	1179410	Forficula laeviforceps	Chopard, 1938	accepted	urn:lsid:faunaeur.org:taxname:347912		exact			6723293	urn:lsid:globalnames.org:index:382b67e9-b1a5-58ea-a9b4-e7009e2d8134
Forficula lesnei Finot, 1887	species	1179399	Forficula lesnei	Finot, 1887	accepted	urn:lsid:faunaeur.org:taxname:347913		exact			6915772	urn:lsid:globalnames.org:index:767e3e6c-9e89-5ed9-82d1-2d4dc5b4b7e8
Forficula lucasi Dohrn, 1865	species	1181482	Forficula lucasi	Dohrn, 1865	accepted	urn:lsid:faunaeur.org:taxname:347914		exact
Forficula barroisi Bolivar, 1893	synonym species	1179426	Forficula lucasi	Bolivar, 1893	is subjective synonym of	urn:lsid:faunaeur.org:taxname:347916	urn:lsid:faunaeur.org:taxname:347914	exact
Forficula escherichi Krauss, 1895	synonym species	1179927	Forficula lucasi	Dohrn, 1865	is subjective synonym of	urn:lsid:faunaeur.org:taxname:347915	urn:lsid:faunaeur.org:taxname:347914	exact
Forficula lurida Fischer, 1853	species	1180813	Forficula lurida	Fischer, 1853	accepted	urn:lsid:faunaeur.org:taxname:347917		exact
Forficula orientalis Burr, 1900	synonym species	1179853	Forficula lurida	Burr, 1900	is subjective synonym of	urn:lsid:faunaeur.org:taxname:347918	urn:lsid:faunaeur.org:taxname:347917	exact
Forficula riffensis Burr, 1909	species	1179695	Forficula riffensis	Burr, 1909	accepted	urn:lsid:faunaeur.org:taxname:347919		exact
Forficula ruficollis Fabricius, 1798	species	1179339	Forficula ruficollis	Fabricius, 1798	accepted	urn:lsid:faunaeur.org:taxname:347920		exact
Forficula baetica Rambur, 1838	synonym species	1179375	Forficula ruficollis	Rambur, 1838	is subjective synonym of	urn:lsid:faunaeur.org:taxname:347921	urn:lsid:faunaeur.org:taxname:347920	exact
Forficula scudderi de Bormans, 1880	species	1180526	Forficula scudderi	Bormans, 1880	accepted	urn:lsid:faunaeur.org:taxname:347922		exact
Forficula silana Costa, 1881	species	1179597	Forficula silana	Costa, 1881	accepted	urn:lsid:faunaeur.org:taxname:347924		exact
Forficula targionii Brunner von Wattenwyl, 1882	synonym species	1180302	Forficula silana	Brunner, 1882	is subjective synonym of	urn:lsid:faunaeur.org:taxname:347925	urn:lsid:faunaeur.org:taxname:347924	exact
Forficula smyrnensis Audinet-Serville, 1838	species	1179939	Forficula smyrnensis	Serville, 1839	accepted	urn:lsid:faunaeur.org:taxname:347926		exact
Forficula tomis (Kolenati, 1846)	species	1179396	Forficula tomis	(Kolenati, 1846)	accepted	urn:lsid:faunaeur.org:taxname:347928		exact
Forficula hellmanni Kittary, 1849	synonym species	1179987	Forficula tomis	Kittary, 1849	is subjective synonym of	urn:lsid:faunaeur.org:taxname:347929	urn:lsid:faunaeur.org:taxname:347928	exact
Forficula mesmini Azam, 1906	synonym species	1180025	Forficula tomis	Azam, 1906	is subjective synonym of	urn:lsid:faunaeur.org:taxname:347932	urn:lsid:faunaeur.org:taxname:347928	exact
Forficula elongata Eversmann, 1859	synonym species	1180382	Forficula tomis	Eversman, 1859	is subjective synonym of	urn:lsid:faunaeur.org:taxname:347930	urn:lsid:faunaeur.org:taxname:347928	exact
Forficula pomerantzevi Semenov, 1903	synonym species	1182142	Forficula tomis	Semenov, 1903	is subjective synonym of	urn:lsid:faunaeur.org:taxname:347931	urn:lsid:faunaeur.org:taxname:347928	exact
			Gonolabis maxima	(Brullé, 1838)	accepted	urn:lsid:faunaeur.org:taxname:347839		no match	objective synonym of Canarilabis maxima (Brulle, 1838) ?
Guanchia bandamaensis Martin, 1978	species	1179604	Guanchia bandamaensis	Martin, 1978	accepted	urn:lsid:faunaeur.org:taxname:347871		exact
Guanchia brevitarsis (Chopard, 1942)	species	1179411	Guanchia brevitarsis	(Chopard, 1942)	accepted	urn:lsid:faunaeur.org:taxname:347872		exact
Guanchia brignolii (Taglianti, 1974)	species	1179501	Guanchia brignolii	(Taglianti, 1974)	accepted	urn:lsid:faunaeur.org:taxname:347873		exact
Guanchia cabrerae (Bolivar, 1893)	species	1179425	Guanchia cabrerae	(Bolivar, 1893)	accepted	urn:lsid:faunaeur.org:taxname:347874		exact
Guanchia canariensis (Burr, 1905)	species	1181866	Guanchia canariensis	(Burr, 1905)	accepted	urn:lsid:faunaeur.org:taxname:347875		exact
Guanchia circinata (Finot, 1893)	species	1179400	Guanchia circinata	(Finot, 1893)	accepted	urn:lsid:faunaeur.org:taxname:347876		exact
Guanchia fernandezi Martin, 1978	species	1179605	Guanchia fernandezi	Martin, 1978	accepted	urn:lsid:faunaeur.org:taxname:347877		exact
Guanchia gomerensis Martin, 1978	species	1179606	Guanchia gomerensis	Martin, 1978	accepted	urn:lsid:faunaeur.org:taxname:347878		exact
Guanchia guancharia (Heller, 1907)	species	1180292	Guanchia guancharia	(Heller, 1907)	accepted	urn:lsid:faunaeur.org:taxname:347879		exact
Guanchia hincksi (Burr, 1947)	species	1181377	Guanchia hincksi	(Burr, 1947)	accepted	urn:lsid:faunaeur.org:taxname:347880		exact
Guanchia kaznakovi (Semenov, 1908)	species	1179996	Guanchia kaznakovi	(Semenov, 1903)	accepted	urn:lsid:faunaeur.org:taxname:347881		exact
Guanchia obtusangula (Krauss, 1904)	species	1180381	Guanchia obtusangula	(Krauss, 1904)	accepted	urn:lsid:faunaeur.org:taxname:347882		exact
			Guanchia palmensis	Baez, 1986	accepted	urn:lsid:faunaeur.org:taxname:347883		no match	Gap
Guanchia pubescens (Géné, 1837)	species	1180119	Guanchia pubescens	(Gene, 1837)	accepted	urn:lsid:faunaeur.org:taxname:347884		exact
Forficula setulosa Fieber, 1853	synonym species	1179976	Guanchia pubescens	Fieber, 1853	is subjective synonym of	urn:lsid:faunaeur.org:taxname:347885	urn:lsid:faunaeur.org:taxname:347884	exact
Forficula yersini Brisout de Barneville, 1856	synonym species	1181958	Guanchia pubescens	Barneville, 1856	is subjective synonym of	urn:lsid:faunaeur.org:taxname:347886	urn:lsid:faunaeur.org:taxname:347884	exact
Guanchia schmitzi (Borelli, 1906)	species	1179803	Guanchia schmitzi	(Borelli, 1906)	accepted	urn:lsid:faunaeur.org:taxname:347888		exact
Guanchia storai Chopard, 1942	species	1179412	Guanchia storai	Chopard, 1942	accepted	urn:lsid:faunaeur.org:taxname:347889		exact			17550718	urn:lsid:globalnames.org:index:42d1a2c3-c169-5a71-bfcf-169bcbab847f
Guanchia tenerifensis Martin, 1978	species	1179603	Guanchia tenerifensis	Martin, 1978	accepted	urn:lsid:faunaeur.org:taxname:347890		exact
Guanchia transversa Brindle, 1968	species	1180287	Guanchia transversa	Brindle, 1968	accepted	urn:lsid:faunaeur.org:taxname:347891		exact
Guanchia uxoris (Heller, 1907)	species	1180291	Guanchia uxoris	(Heller, 1907)	accepted	urn:lsid:faunaeur.org:taxname:347892		exact
Isolabella graeca Verhoeff, 1902	species	1181906	Isolabella graeca	Verhoeff, 1901	accepted	urn:lsid:faunaeur.org:taxname:348064		exact			7040814	urn:lsid:globalnames.org:index:563e6778-4a68-5ab9-86ae-c033d45cdc78
Isolaboides kosswigi (Hincks, 1947)	species	1181527	Isolaboides kosswigi	(Burr, 1947)	accepted	urn:lsid:faunaeur.org:taxname:348067		exact			7090718	urn:lsid:globalnames.org:index:909591cd-3fcd-5210-afc0-7b17512207bb
Labia minor (Linnaeus, 1758)	species	1179593	Labia minor	(Linnaeus, 1758)	accepted	urn:lsid:faunaeur.org:taxname:348060		exact
Labia minor Rehn & Hebard, 1914	synonym species	1179758	Labia minor	(Linnaeus, 1758)	accepted	urn:lsid:faunaeur.org:taxname:348060		exact
Labidura pugnax Kirby, 1891	synonym species	1180772	Labidura riparia	(Pallas, 1773)	accepted	urn:lsid:faunaeur.org:taxname:347996		exact
Forficula pallipes Dufour, 1820	synonym species	1182130	Labidura riparia	Fabricius, 1775	is subjective synonym of	urn:lsid:faunaeur.org:taxname:347998	urn:lsid:faunaeur.org:taxname:347996	exact
Labidura riparia (Pallas, 1773)	species	1179760	Labidura riparia	Dohrn, 1863	is subjective synonym of	urn:lsid:faunaeur.org:taxname:348021	urn:lsid:faunaeur.org:taxname:347996	exact
Labidura distincta Rodzianko, 1897	synonym species	1179336	Labidura riparia	Rodzianko, 1897	is subjective synonym of	urn:lsid:faunaeur.org:taxname:348026	urn:lsid:faunaeur.org:taxname:347996	exact
Forficula amurensis Motschulsky, 1859	synonym species	1179378	Labidura riparia	Motschulsky, 1858	is subjective synonym of	urn:lsid:faunaeur.org:taxname:348019	urn:lsid:faunaeur.org:taxname:347996	exact
Forficula bilineata Herbst, 1786	synonym species	1179388	Labidura riparia	Herbst, 1786	is subjective synonym of	urn:lsid:faunaeur.org:taxname:348000	urn:lsid:faunaeur.org:taxname:347996	exact
Forficula marginella Costa, 1839	synonym species	1179397	Labidura riparia	Costa, 1839	is subjective synonym of	urn:lsid:faunaeur.org:taxname:348015	urn:lsid:faunaeur.org:taxname:347996	exact
Labidura auditor Scudder, 1876	synonym species	1179510	Labidura riparia	Scudder, 1878	is subjective synonym of	urn:lsid:faunaeur.org:taxname:348022	urn:lsid:faunaeur.org:taxname:347996	exact
Labidura dubronyi Borg, 1904	synonym species	1179741	Labidura riparia	Borg, 1904	is subjective synonym of	urn:lsid:faunaeur.org:taxname:348030	urn:lsid:faunaeur.org:taxname:347996	exact
Forficula pallipes Fabricius, 1775	synonym species	1179891	Labidura riparia	Fabricius, 1775	is subjective synonym of	urn:lsid:faunaeur.org:taxname:347998	urn:lsid:faunaeur.org:taxname:347996	exact
Forficula flavipes Fabricius, 1793	synonym species	1179897	Labidura riparia	Fabricius, 1793	is subjective synonym of	urn:lsid:faunaeur.org:taxname:348005	urn:lsid:faunaeur.org:taxname:347996	exact
Forficula erythrocephala Fabricius, 1793	synonym species	1179898	Labidura riparia	Fabricius, 1793	is subjective synonym of	urn:lsid:faunaeur.org:taxname:348004	urn:lsid:faunaeur.org:taxname:347996	exact
Forficula gigantea Fabricius, 1787	synonym species	1179905	Labidura riparia	Fabricius, 1793	is subjective synonym of	urn:lsid:faunaeur.org:taxname:348006	urn:lsid:faunaeur.org:taxname:347996	exact
Forficesila terminalis Audinet-Serville, 1838	synonym species	1179930	Labidura riparia	Audinet-Serville, 1839	is subjective synonym of	urn:lsid:faunaeur.org:taxname:348014	urn:lsid:faunaeur.org:taxname:347996	exact
Labidura confusa Capra, 1929	synonym species	1180114	Labidura riparia	Capra, 1929	is subjective synonym of	urn:lsid:faunaeur.org:taxname:348034	urn:lsid:faunaeur.org:taxname:347996	exact
Labidura granulosa Kirby, 1891	synonym species	1180774	Labidura riparia	Kirby, 1891	is subjective synonym of	urn:lsid:faunaeur.org:taxname:348024	urn:lsid:faunaeur.org:taxname:347996	exact
Labidura clarki Kirby, 1891	synonym species	1180776	Labidura riparia	Kirby, 1891	is subjective synonym of	urn:lsid:faunaeur.org:taxname:348023	urn:lsid:faunaeur.org:taxname:347996	exact
Labidura truncata Kirby, 1903	synonym species	1180781	Labidura riparia	Kirby, 1903	is subjective synonym of	urn:lsid:faunaeur.org:taxname:348029	urn:lsid:faunaeur.org:taxname:347996	exact
Labidura mongolica Rehn, 1905	synonym species	1180861	Labidura riparia	Rehn, 1905	is subjective synonym of	urn:lsid:faunaeur.org:taxname:348033	urn:lsid:faunaeur.org:taxname:347996	exact
Labidura bengalensis Dohrn, 1863	synonym species	1181446	Labidura riparia	Dohrn, 1863	is subjective synonym of	urn:lsid:faunaeur.org:taxname:348020	urn:lsid:faunaeur.org:taxname:347996	exact
Forficula rufescens Palisot de Beauvois, 1805	synonym species	1181949	Labidura riparia	Palisot, 1805	is subjective synonym of	urn:lsid:faunaeur.org:taxname:348007	urn:lsid:faunaeur.org:taxname:347996	exact
Forficula bivittata Klug, 1838	synonym species	1182009	Labidura riparia	Klug, 1838	is subjective synonym of	urn:lsid:faunaeur.org:taxname:348012	urn:lsid:faunaeur.org:taxname:347996	exact
Forficesila suturalis Burmeister, 1838	synonym species	1182035	Labidura riparia	Burmeister, 1838	is subjective synonym of	urn:lsid:faunaeur.org:taxname:348011	urn:lsid:faunaeur.org:taxname:347996	exact
Forficula bidens Olivier, 1791	synonym species	1182088	Labidura riparia	Olivier, 1791	is subjective synonym of	urn:lsid:faunaeur.org:taxname:348002	urn:lsid:faunaeur.org:taxname:347996	exact
Forficula crenata Olivier, 1791	synonym species	1182089	Labidura riparia	Olivier, 1791	is subjective synonym of	urn:lsid:faunaeur.org:taxname:348003	urn:lsid:faunaeur.org:taxname:347996	exact
Forficesila affinis Guerin-Méneville, 1836	synonym species	1182123	Labidura riparia	Guérin-Méneville, 1836	is subjective synonym of	urn:lsid:faunaeur.org:taxname:348009	urn:lsid:faunaeur.org:taxname:347996	exact
Forficula bicolor Motschulsky, 1846	synonym species	1182124	Labidura riparia	Motschulsky, 1846	is subjective synonym of	urn:lsid:faunaeur.org:taxname:348017	urn:lsid:faunaeur.org:taxname:347996	exact
Forficula fischeri Motschulsky, 1846	synonym species	1182125	Labidura riparia	Motschulsky, 1846	is subjective synonym of	urn:lsid:faunaeur.org:taxname:348018	urn:lsid:faunaeur.org:taxname:347996	exact
Labidura japonica (Haan, 1842)	species	1179926	Labidura riparia	Borg, 1904	is subjective synonym of	urn:lsid:faunaeur.org:taxname:348031	urn:lsid:faunaeur.org:taxname:347996	exact
Labidura orientalis Steinmann, 1979	species	1218462	Labidura riparia	Kirby, 1891	is subjective synonym of	urn:lsid:faunaeur.org:taxname:348025	urn:lsid:faunaeur.org:taxname:347996	exact
Tomopygia sinensis Burr, 1904	species	1222681	Labidura riparia	Burr, 1904	is subjective synonym of	urn:lsid:faunaeur.org:taxname:348032	urn:lsid:faunaeur.org:taxname:347996	exact
Marava arachidis Yersin, 1860	species	1179777	Marava arachidis	(Yersin, 1860)	accepted	urn:lsid:faunaeur.org:taxname:348042		exact
Labia grandis Dubrony, 1879	synonym species	1179877	Marava arachidis	Dubrony, 1879	is subjective synonym of	urn:lsid:faunaeur.org:taxname:348048	urn:lsid:faunaeur.org:taxname:348042	exact
Forficula (Apterygida) gravidula Gerstaecker, 1873	synonym species	1179907	Marava arachidis	Gerstaecker, 1873	is subjective synonym of	urn:lsid:faunaeur.org:taxname:348046	urn:lsid:faunaeur.org:taxname:348042	exact
Forficula nigripennis Motschulsky, 1863	synonym species	1180432	Marava arachidis	Motschulsky, 1863	is subjective synonym of	urn:lsid:faunaeur.org:taxname:348043	urn:lsid:faunaeur.org:taxname:348042	exact
Prolabia ascensionis Hebard, 1917	synonym species	1180492	Marava arachidis	Hebard, 1917	is subjective synonym of	urn:lsid:faunaeur.org:taxname:348049	urn:lsid:faunaeur.org:taxname:348042	exact
Nala lividipes (Dufour, 1820)	species	1179890	Nala lividipes	(Dufour, 1828)	accepted	urn:lsid:faunaeur.org:taxname:347987		exact			12183865	urn:lsid:globalnames.org:index:e08780b6-f142-5510-9982-07f0f2a4a9a9
Forficesila meridionalis Audinet-Serville, 1838	synonym species	1179932	Nala lividipes	Audinet-Serville, 1839	is subjective synonym of	urn:lsid:faunaeur.org:taxname:347989	urn:lsid:faunaeur.org:taxname:347987	exact
Forficesila castanea Audinet-Serville, 1838	synonym species	1179933	Nala lividipes	Audinet-Serville, 1839	is subjective synonym of	urn:lsid:faunaeur.org:taxname:347988	urn:lsid:faunaeur.org:taxname:347987	exact
Labidura australica Mjöberg, 1913	synonym species	1180427	Nala lividipes	Mjoberg, 1913	is subjective synonym of	urn:lsid:faunaeur.org:taxname:347994	urn:lsid:faunaeur.org:taxname:347987	exact
Echinosoma obscurum Kirby, 1900	synonym species	1182030	Nala lividipes	Kirby, 1900	is subjective synonym of	urn:lsid:faunaeur.org:taxname:347992	urn:lsid:faunaeur.org:taxname:347987	exact
Forficesila vicina Lucas, 1846	synonym species	1182128	Nala lividipes	Lucas, 1846	is subjective synonym of	urn:lsid:faunaeur.org:taxname:347990	urn:lsid:faunaeur.org:taxname:347987	exact
Labidura icterica Audinet-Serville, 1838	synonym species	1179931	Nala lividipes	Kirby, 1900	is subjective synonym of	urn:lsid:faunaeur.org:taxname:347993	urn:lsid:faunaeur.org:taxname:347987	exact
Paralabella curvicauda (Motschulsky, 1863)	species	1180430	Paralabella curvicauda	(Motschulsky, 1863)	accepted	urn:lsid:faunaeur.org:taxname:348052		exact
Platylabia camerunensis Borg, 1904	synonym species	1179739	Paralabella curvicauda	Borg, 1904	is subjective synonym of	urn:lsid:faunaeur.org:taxname:348059	urn:lsid:faunaeur.org:taxname:348052	exact
Forficesila dilaticauda Motschulsky, 1863	synonym species	1180431	Paralabella curvicauda	Motschulsky, 1863	is subjective synonym of	urn:lsid:faunaeur.org:taxname:348053	urn:lsid:faunaeur.org:taxname:348052	exact
Labia rechingeri Holdhaus, 1908	synonym species	1180574	Paralabella curvicauda	Holdhaus, 1903	is subjective synonym of	urn:lsid:faunaeur.org:taxname:348058	urn:lsid:faunaeur.org:taxname:348052	exact
Platylabia guineensis Dohrn, 1867	synonym species	1181492	Paralabella curvicauda	Dohrn, 1867	is subjective synonym of	urn:lsid:faunaeur.org:taxname:348055	urn:lsid:faunaeur.org:taxname:348052	exact
Platylabia dimidiata Dohrn, 1867	synonym species	1181493	Paralabella curvicauda	Dohrn, 1867	is subjective synonym of	urn:lsid:faunaeur.org:taxname:348054	urn:lsid:faunaeur.org:taxname:348052	exact
Labia flavicollis de Bormans, 1903	synonym species	1181997	Paralabella curvicauda	Bormans, 1903	is subjective synonym of	urn:lsid:faunaeur.org:taxname:348057	urn:lsid:faunaeur.org:taxname:348052	exact
Labia flavicollis Burr, 1903	synonym species	1180653	Paralabella curvicauda	Bormans, 1903	is subjective synonym of	urn:lsid:faunaeur.org:taxname:348057	urn:lsid:faunaeur.org:taxname:348052	exact
Parisolabis elegans (Hebard, 1917)	species	1180496	Parisolabis elegans	(Hebard, 1917)	accepted	urn:lsid:faunaeur.org:taxname:347836		exact
Perirrhytus edentulus (Wollaston, 1858)	species	1179355	Perirrhytus edentulus	(Wollaston, 1858)	accepted	urn:lsid:faunaeur.org:taxname:347946		exact
Perirrhytus lundbladi Hincks, 1938	species	1180407	Perirrhytus lundbladi	Hincks, 1938	accepted	urn:lsid:faunaeur.org:taxname:347947		exact			6723295	urn:lsid:globalnames.org:index:04e285bd-31d6-537c-bb71-98809fc7538d
Perirrhytus madeirensis (Borelli, 1908)	species	1180159	Perirrhytus madeirensis	(Borelli, 1908)	accepted	urn:lsid:faunaeur.org:taxname:347948		exact
			Perirrhytus pseudomadeirensis	Lange, 1991	accepted	urn:lsid:faunaeur.org:taxname:347949		no match	Gap		16990165	urn:lsid:globalnames.org:index:9310baf2-590d-574d-b9be-1f6aaf39a84f
Pseudochelidura minor Steinmann, 1979	species	1180126	Pseudochelidura minor	Steinmann, 1979	accepted	urn:lsid:faunaeur.org:taxname:347939		exact			6956971	urn:lsid:globalnames.org:index:37658a52-eaff-579e-a618-c22d701dcec0
Pseudochelidura montuosa Steinmann, 1981	species	1180454	Pseudochelidura montuosa	Steinmann, 1981	accepted	urn:lsid:faunaeur.org:taxname:347941		exact			16715594	urn:lsid:globalnames.org:index:b466e12c-0179-548e-b35c-5c910cbba464
Pseudochelidura orsinii (Géné, 1832)	species	1179638	Pseudochelidura orsinii	(Gene, 1833)	accepted	urn:lsid:faunaeur.org:taxname:347942		exact
Pseudochelidura sinuata (Lafresnaye, 1828)	species	1182113	Pseudochelidura sinuata	(Lafresnaye, 1828)	accepted	urn:lsid:faunaeur.org:taxname:347943		exact
Chelidura vittigera Fischer, 1846	synonym species	1182021	Pseudochelidura sinuata	Fischer, 1846	is subjective synonym of	urn:lsid:faunaeur.org:taxname:347944	urn:lsid:faunaeur.org:taxname:347943	exact
